# Supplementary material
Source: PubMed Central journal article supplement (PMC4515175)
Supplement: NIHMS708061-supplement-supplemental_material.pdf [file NIHMS708061-supplement-supplemental_material.pdf]

## Supplementary Information

### Cytotoxic Indolocarbazoles from *Actinomadura mellioura* ATCC 39691

Khaled A. Shaaban,<sup>†,‡</sup> Sherif I. Elshahawi,<sup>†,‡</sup> Xiachang Wang,<sup>†,‡</sup> Jamie Horn,<sup>‡</sup> Madan K. Kharel,<sup>§</sup>  
Markos Leggas,<sup>†,‡</sup> Jon S. Thorson<sup>\*,†,‡</sup>

<sup>†</sup>Center for Pharmaceutical Research and Innovation, College of Pharmacy, University of Kentucky, 789 South Limestone Street, Lexington, Kentucky 40536, United States

<sup>‡</sup>Department of Pharmaceutical Sciences, College of Pharmacy, University of Kentucky, Lexington, Kentucky 40536, United

<sup>§</sup>School of Pharmacy, University of Maryland Eastern Shore, Princess Anne, Maryland 21853, United States

\*To whom correspondence should be addressed. Email: jsthorson@uky.edu

| <b>Table of Contents:</b>                                                                                                                                                       | <b>Page</b> |
|---------------------------------------------------------------------------------------------------------------------------------------------------------------------------------|-------------|
| <b>Figure S1:</b> UV (MeOH) spectra of AT2433-A1 ( <b>6</b> ), A3, A4, A5 and B3 ( <b>1-4</b> )                                                                                 | S4          |
| <b>Figure S2:</b> TOCSY (—) correlations in AT2433-A1 ( <b>6</b> ), A3, A4, A5, B3 ( <b>1-4</b> ), BMY-41219 ( <b>5</b> ) and harman (1-methyl- $\beta$ -carboline, <b>12</b> ) | S4          |
| <b>Figure S3:</b> <i>Actinomadura mellioura</i> ATCC 39691 culture broth after inoculation and cultivation on A-medium at 28 °C, and 200 rpm for 6 days                         | S5          |
| <b>Figure S4:</b> HPLC of AT2433-A3 ( <b>1</b> )                                                                                                                                | S6          |
| <b>Figure S5:</b> HPLC/UV/MS analyses of the purified AT2433-A3 ( <b>1</b> )                                                                                                    | S7          |
| <b>Figure S6:</b> (+)-HRESI-MS spectrum of AT2433-A3 ( <b>1</b> )                                                                                                               | S8          |
| <b>Figure S7:</b> (–)-HRESI-MS spectrum of AT2433-A3 ( <b>1</b> )                                                                                                               | S9          |
| <b>Figure S8:</b> <sup>1</sup> H NMR spectrum (CD <sub>3</sub> OD, 500 MHz) of AT2433-A3 ( <b>1</b> )                                                                           | S10         |
| <b>Figure S9:</b> <sup>13</sup> C NMR spectrum (CD <sub>3</sub> OD, 100 MHz) of AT2433-A3 ( <b>1</b> )                                                                          | S11         |
| <b>Figure S10:</b> <sup>1</sup> H- <sup>1</sup> H COSY spectrum (CD <sub>3</sub> OD, 500 MHz) of AT2433-A3 ( <b>1</b> )                                                         | S12         |
| <b>Figure S11:</b> HSQC spectrum (CD <sub>3</sub> OD, 500 MHz) of AT2433-A3 ( <b>1</b> )                                                                                        | S13         |
| <b>Figure S12:</b> HMBC spectrum (CD <sub>3</sub> OD, 500 MHz) of AT2433-A3 ( <b>1</b> )                                                                                        | S14         |
| <b>Figure S13:</b> TOCSY spectrum (CD <sub>3</sub> OD, 500 MHz) of AT2433-A3 ( <b>1</b> )                                                                                       | S15         |
| <b>Figure S14:</b> NOESY spectrum (CD <sub>3</sub> OD, 500 MHz) of AT2433-A3 ( <b>1</b> )                                                                                       | S16         |
| <b>Figure S15:</b> HPLC of AT2433-A4 ( <b>2</b> )                                                                                                                               | S17         |
| <b>Figure S16:</b> (–)-HRESI-MS spectrum of AT2433-A4 ( <b>2</b> )                                                                                                              | S18         |
| <b>Figure S17:</b> (+)-HRESI-MS spectrum of AT2433-A4 ( <b>2</b> )                                                                                                              | S19         |

|                                                                                                       |     |
|-------------------------------------------------------------------------------------------------------|-----|
| <b>Figure S18:</b> $^1\text{H}$ NMR spectrum (DMSO- $d_6$ , 500 MHz) of AT2433-A4 (2)                 | S20 |
| <b>Figure S19:</b> $^{13}\text{C}$ NMR spectrum (DMSO- $d_6$ , 100 MHz) of AT2433-A4 (2)              | S21 |
| <b>Figure S20:</b> $^1\text{H}$ - $^1\text{H}$ COSY spectrum (DMSO- $d_6$ , 500 MHz) of AT2433-A4 (2) | S22 |
| <b>Figure S21:</b> HSQC spectrum (DMSO- $d_6$ , 500 MHz) of AT2433-A4 (2)                             | S23 |
| <b>Figure S22:</b> HMBC spectrum (DMSO- $d_6$ , 500 MHz) of AT2433-A4 (2)                             | S24 |
| <b>Figure S23:</b> TOCSY spectrum (DMSO- $d_6$ , 500 MHz) of AT2433-A4 (2)                            | S25 |
| <b>Figure S24:</b> NOESY spectrum (DMSO- $d_6$ , 500 MHz) of AT2433-A4 (2)                            | S26 |
| <b>Figure S25:</b> HPLC of AT2433-A5 (3)                                                              | S27 |
| <b>Figure S26:</b> (-)-HRESI-MS spectrum of AT2433-A5 (3)                                             | S28 |
| <b>Figure S27:</b> $^1\text{H}$ NMR spectrum (DMSO- $d_6$ , 500 MHz) of AT2433-A5 (3)                 | S29 |
| <b>Figure S28:</b> $^{13}\text{C}$ NMR spectrum (DMSO- $d_6$ , 100 MHz) of AT2433-A5 (3)              | S30 |
| <b>Figure S29:</b> $^1\text{H}$ - $^1\text{H}$ COSY spectrum (CD $_3$ OD, 500 MHz) of AT2433-A5 (3)   | S31 |
| <b>Figure S30:</b> Enlarged HSQC spectrum (DMSO- $d_6$ , 500 MHz) of AT2433-A5 (3)                    | S32 |
| <b>Figure S31:</b> Enlarged HMBC spectrum (DMSO- $d_6$ , 500 MHz) of AT2433-A5 (3)                    | S33 |
| <b>Figure S32:</b> Enlarged TOCSY spectrum (DMSO- $d_6$ , 500 MHz) of AT2433-A5 (3)                   | S34 |
| <b>Figure S33:</b> HPLC of AT2433-B3 (4)                                                              | S35 |
| <b>Figure S34:</b> (+) and (-)-APCI-MS spectra of AT2433-B3 (4)                                       | S36 |
| <b>Figure S35:</b> (-)-HRESI-MS spectrum of AT2433-B3 (4)                                             | S37 |
| <b>Figure S36:</b> (+)-HRESI-MS spectrum of AT2433-B3 (4)                                             | S38 |
| <b>Figure S37:</b> $^1\text{H}$ NMR spectrum (CD $_3$ OD, 500 MHz) of AT2433-B3 (4)                   | S39 |
| <b>Figure S38:</b> $^{13}\text{C}$ NMR spectrum (CD $_3$ OD, 100 MHz) of AT2433-B3 (4)                | S40 |
| <b>Figure S39:</b> $^1\text{H}$ - $^1\text{H}$ COSY spectrum (CD $_3$ OD, 500 MHz) of AT2433-B3 (4)   | S41 |
| <b>Figure S40:</b> HSQC spectrum (CD $_3$ OD, 500 MHz) of AT2433-B3 (4)                               | S42 |
| <b>Figure S41:</b> HMBC spectrum (CD $_3$ OD, 500 MHz) of AT2433-B3 (4)                               | S43 |
| <b>Figure S42:</b> TOCSY spectrum (CD $_3$ OD, 500 MHz) of AT2433-B3 (4)                              | S44 |
| <b>Figure S43:</b> NOESY spectrum (CD $_3$ OD, 500 MHz) of AT2433-B3 (4)                              | S45 |
| <b>Figure S44:</b> HPLC/UV/MS analyses of the purified BMY-41219 (5)                                  | S46 |
| <b>Figure S45:</b> (-)-HRESI-MS spectrum of BMY-41219 (5)                                             | S47 |
| <b>Figure S46:</b> (+)-HRESI-MS spectrum of BMY-41219 (5)                                             | S48 |
| <b>Figure S47:</b> $^1\text{H}$ NMR spectrum (CD $_3$ OD, 500 MHz) of BMY-41219 (5)                   | S49 |
| <b>Figure S48:</b> $^{13}\text{C}$ NMR spectrum (CD $_3$ OD, 100 MHz) of BMY-41219 (5)                | S50 |
| <b>Figure S49:</b> $^1\text{H}$ - $^1\text{H}$ COSY spectrum (CD $_3$ OD, 500 MHz) of BMY-41219 (5)   | S51 |
| <b>Figure S50:</b> HSQC spectrum (CD $_3$ OD, 100 MHz) of BMY-41219 (5)                               | S52 |
| <b>Figure S51:</b> HMBC spectrum (CD $_3$ OD, 100 MHz) of BMY-41219 (5)                               | S53 |
| <b>Figure S52:</b> TOCSY spectrum (CD $_3$ OD, 100 MHz) of BMY-41219 (5)                              | S54 |
| <b>Figure S53:</b> NOESY spectrum (CD $_3$ OD, 100 MHz) of BMY-41219 (5)                              | S55 |
| <b>Figure S54:</b> HPLC/UV/MS analyses of AT2433-A1 (6)                                               | S56 |

|                                                                                                                                                                            |     |
|----------------------------------------------------------------------------------------------------------------------------------------------------------------------------|-----|
| <b>Figure S55:</b> <sup>1</sup> H NMR spectrum (CD <sub>3</sub> OD, 500 MHz) of AT2433-A1 ( <b>6</b> )                                                                     | S57 |
| <b>Figure S56:</b> <sup>13</sup> C NMR spectrum (CD <sub>3</sub> OD, 100 MHz) of AT2433-A1 ( <b>6</b> )                                                                    | S58 |
| <b>Figure S57:</b> <sup>1</sup> H- <sup>1</sup> H COSY spectrum (CD <sub>3</sub> OD, 500 MHz) of AT2433-A1 ( <b>6</b> )                                                    | S59 |
| <b>Figure S58:</b> HSQC spectrum (CD <sub>3</sub> OD, 500 MHz) of AT2433-A1 ( <b>6</b> )                                                                                   | S60 |
| <b>Figure S59:</b> HMBC spectrum (CD <sub>3</sub> OD, 500 MHz) of AT2433-A1 ( <b>6</b> )                                                                                   | S61 |
| <b>Figure S60:</b> TOCSY spectrum (CD <sub>3</sub> OD, 500 MHz) of AT2433-A1 ( <b>6</b> )                                                                                  | S62 |
| <b>Figure S61:</b> NOESY spectrum (CD <sub>3</sub> OD, 500 MHz) of AT2433-A1 ( <b>6</b> )                                                                                  | S63 |
| <b>Figure S62:</b> HPLC of AT2433-B1 ( <b>7</b> )                                                                                                                          | S64 |
| <b>Figure S63:</b> HPLC/UV/MS analyses of AT2433-B1 ( <b>7</b> )                                                                                                           | S65 |
| <b>Figure S64:</b> <sup>1</sup> H NMR spectrum (DMSO- <i>d</i> <sub>6</sub> , 400 MHz) of AT2433-B1 ( <b>7</b> )                                                           | S66 |
| <b>Figure S65:</b> <sup>13</sup> C NMR spectrum (DMSO- <i>d</i> <sub>6</sub> , 100 MHz) of AT2433-B1 ( <b>7</b> )                                                          | S67 |
| <b>Figure S66:</b> <sup>13</sup> C NMR spectrum (CD <sub>3</sub> OD, 100 MHz) of AT2433-B1 ( <b>7</b> )                                                                    | S68 |
| <b>Figure S67:</b> HPLC of harman “1-methyl-β-carboline” ( <b>12</b> )                                                                                                     | S69 |
| <b>Figure S68:</b> (+) and (-)-APCI-MS spectra of harman “1-methyl-β-carboline” ( <b>12</b> )                                                                              | S70 |
| <b>Figure S69:</b> (+)-HRESI-MS spectrum of harman “1-methyl-β-carboline” ( <b>12</b> )                                                                                    | S71 |
| <b>Figure S70:</b> <sup>1</sup> H NMR spectrum (DMSO- <i>d</i> <sub>6</sub> , 500 MHz) of harman “1-methyl-β-carboline” ( <b>12</b> )                                      | S72 |
| <b>Figure S71:</b> <sup>13</sup> C NMR spectrum (DMSO- <i>d</i> <sub>6</sub> , 125 MHz) of harman “1-methyl-β-carboline” ( <b>12</b> )                                     | S73 |
| <b>Figure S72:</b> <sup>1</sup> H- <sup>1</sup> H COSY spectrum (DMSO- <i>d</i> <sub>6</sub> , 500 MHz) of harman “1-methyl-β-carboline” ( <b>12</b> )                     | S74 |
| <b>Figure S73:</b> HSQC spectrum (DMSO- <i>d</i> <sub>6</sub> , 500 MHz) of harman “1-methyl-β-carboline” ( <b>12</b> )                                                    | S75 |
| <b>Figure S74:</b> HMBC spectrum (DMSO- <i>d</i> <sub>6</sub> , 500 MHz) of harman “1-methyl-β-carboline” ( <b>12</b> )                                                    | S76 |
| <b>Figure S75:</b> TOCSY spectrum (DMSO- <i>d</i> <sub>6</sub> , 500 MHz) of harman “1-methyl-β-carboline” ( <b>12</b> )                                                   | S77 |
| <b>Figure S76:</b> Isolation scheme of <i>Actinomadura melliaura</i> ATCC39691 metabolites                                                                                 | S78 |
| <b>Figure S77:</b> Chemical structure, <sup>1</sup> H- <sup>1</sup> H-COSY and selected HMBC correlations in harman ( <b>12</b> )                                          | S79 |
| <b>Figure S78:</b> Chemical structures of lumichrome ( <b>13</b> ), riboflavin ( <b>14</b> ) and 5'-methyl-thioadenosine ( <b>15</b> )                                     | S79 |
| <b>Table S1.</b> Cytotoxic activities of compounds <b>1-7</b> at 10 μM (Values are the average of three independent replicates)                                            | S80 |
| <b>Figure S79.</b> Dose–response curve of AT2433-A3 ( <b>1</b> ) and AT2433-A1 ( <b>6</b> ) in PC3 (Prostate), A549 (lung) and U118 (brain) human cancer cell lines at 72h | S80 |
| <b>Figure S80.</b> Selected <sup>1</sup> H- <sup>1</sup> H-COSY, HMBC and NOESY correlations in BMY-41219 ( <b>5</b> )                                                     | S81 |
| <b>Figure S81.</b> Selected <sup>1</sup> H- <sup>1</sup> H-COSY, HMBC and NOESY correlations in AT2433-A1 ( <b>6</b> )                                                     | S81 |
| <b>Table S2.</b> <sup>13</sup> C (100 MHz) and <sup>1</sup> H NMR data of compounds <b>5-7</b>                                                                             | S82 |
| Physico-chemical properties of compounds <b>5-7</b> and harman ( <b>12</b> )                                                                                               | S83 |

---

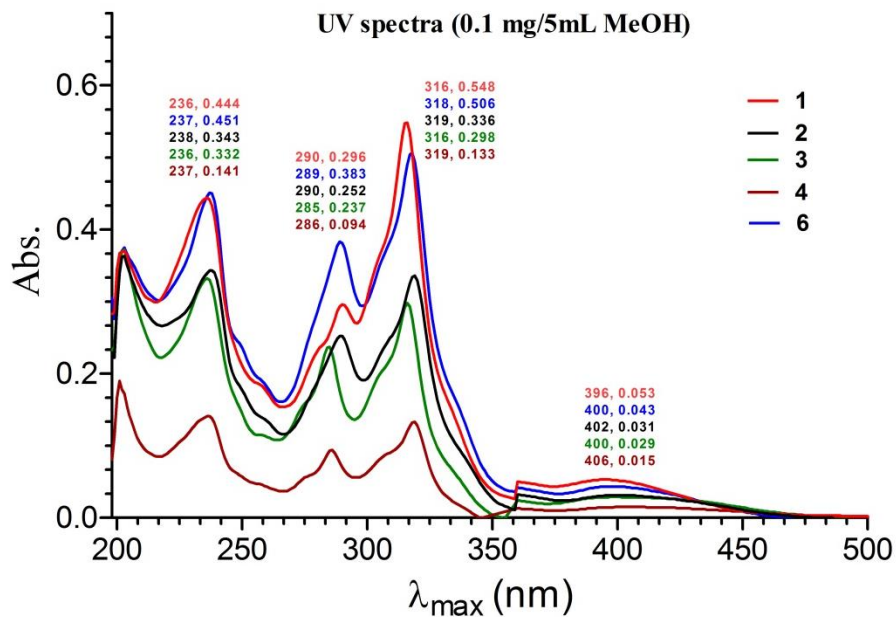

**Figure S1.** UV (MeOH) spectra of AT2433-A1 (**6**), A3, A4, A5 and B3 (**1-4**).

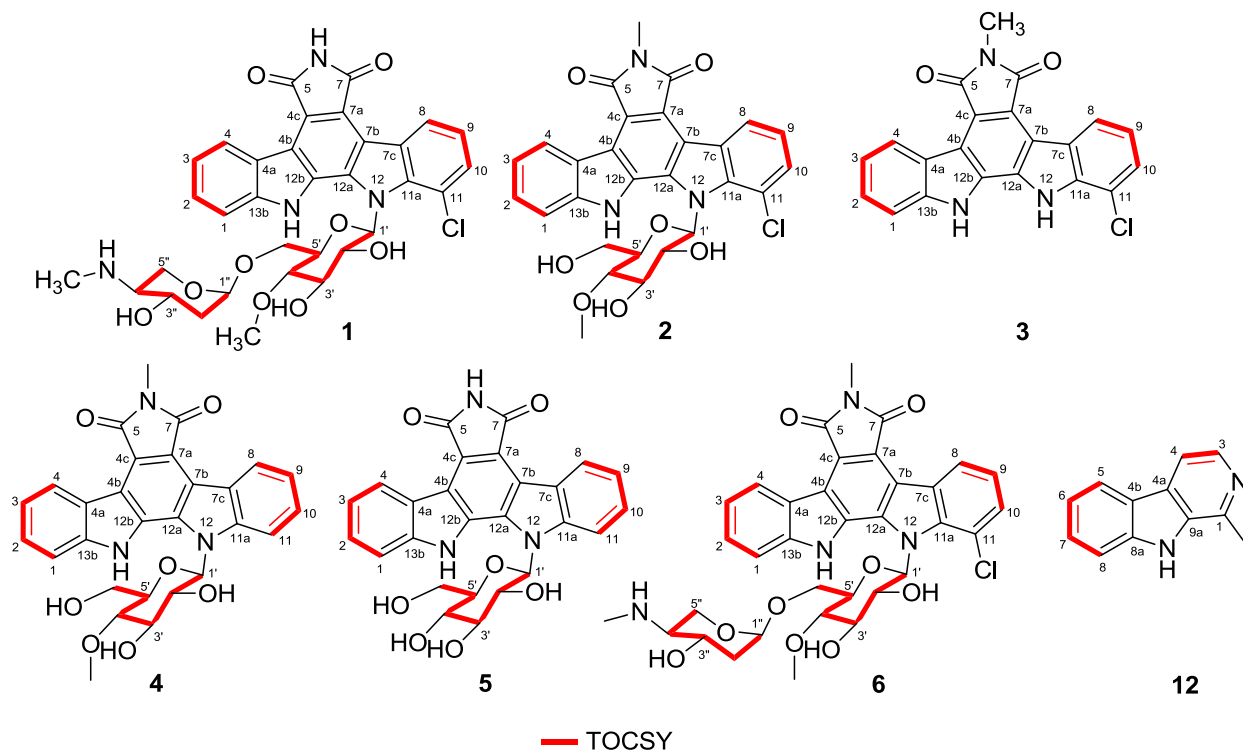

**Figure S2.** TOCSY (—) correlations in AT2433-A1 (**6**), A3, A4, A5, B3 (**1-4**), BMY-41219 (**5**) and harman (1-methyl- $\beta$ -carboline, **12**).

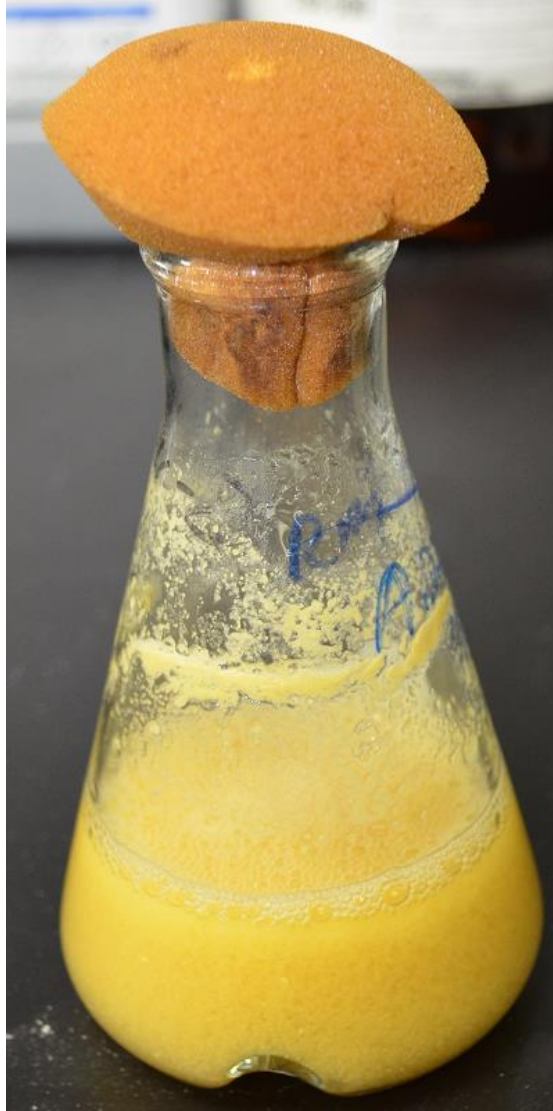

**Figure S3.** *Actinomadura mellioura* ATCC 39691 culture broth after inoculation and cultivation on A-medium at 28 °C, and 200 rpm for 6 days

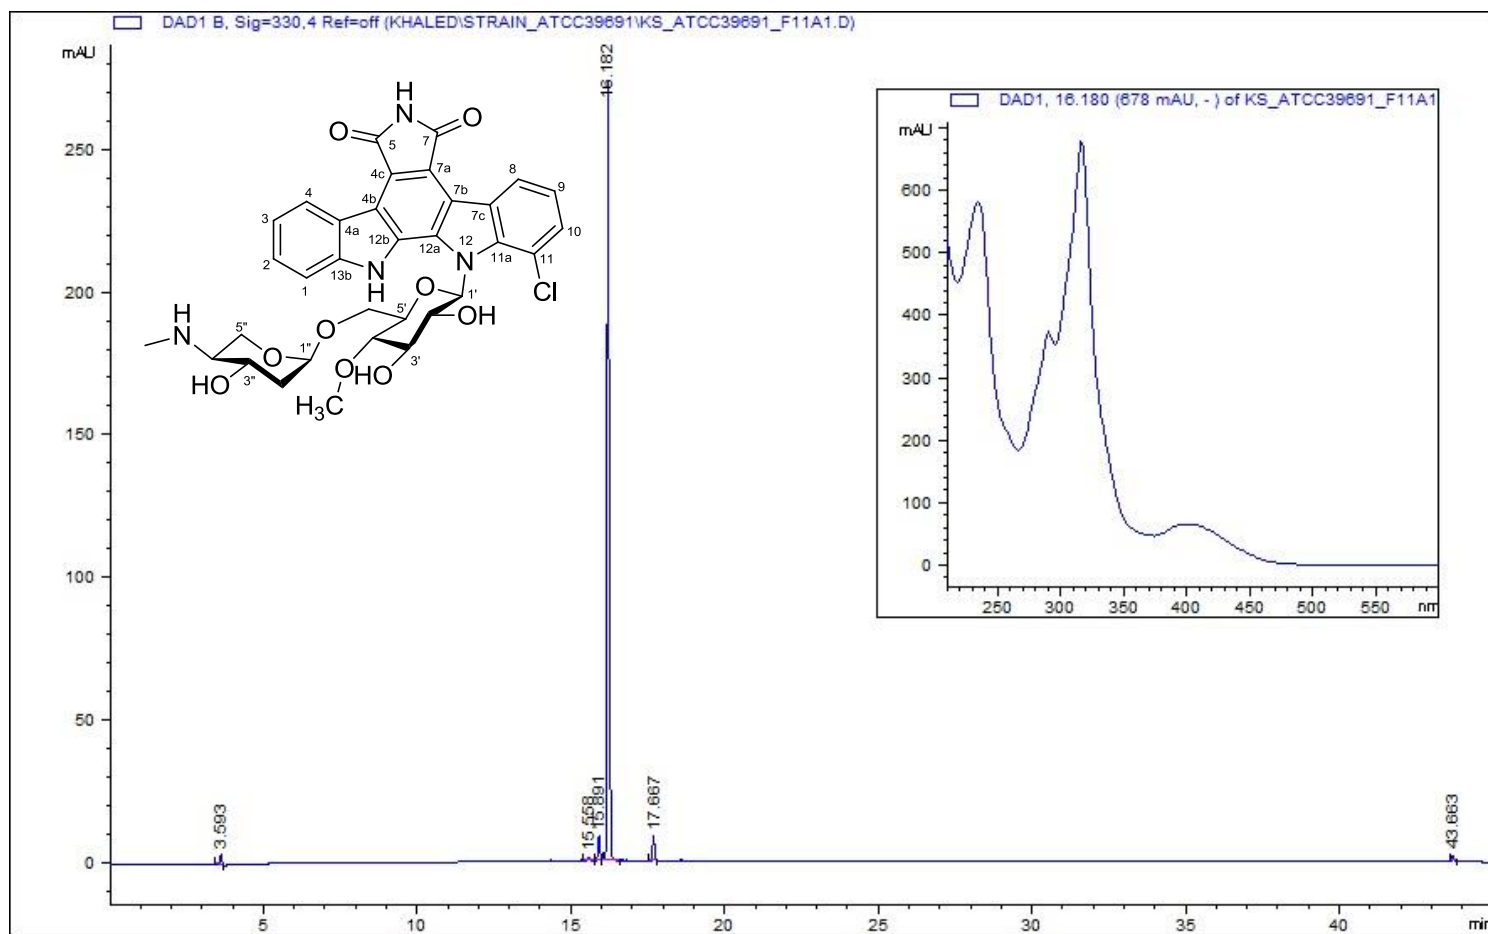

**Figure S4.** HPLC of AT2433-A3 (**1**). HPLC-conditions: Detection wavelength 254 nm; **solvent A:** H<sub>2</sub>O/0.1% TFA; **solvent B:** CH<sub>3</sub>CN; flow rate: 1.0 mL min<sup>-1</sup>; 0-35 min, 5%-100% B; 35-40 min, 100% B; 40-41 min, 100%-5% B; 41-45 min, 5% B). UV-vis inset of full wavelength 190-600 nm.

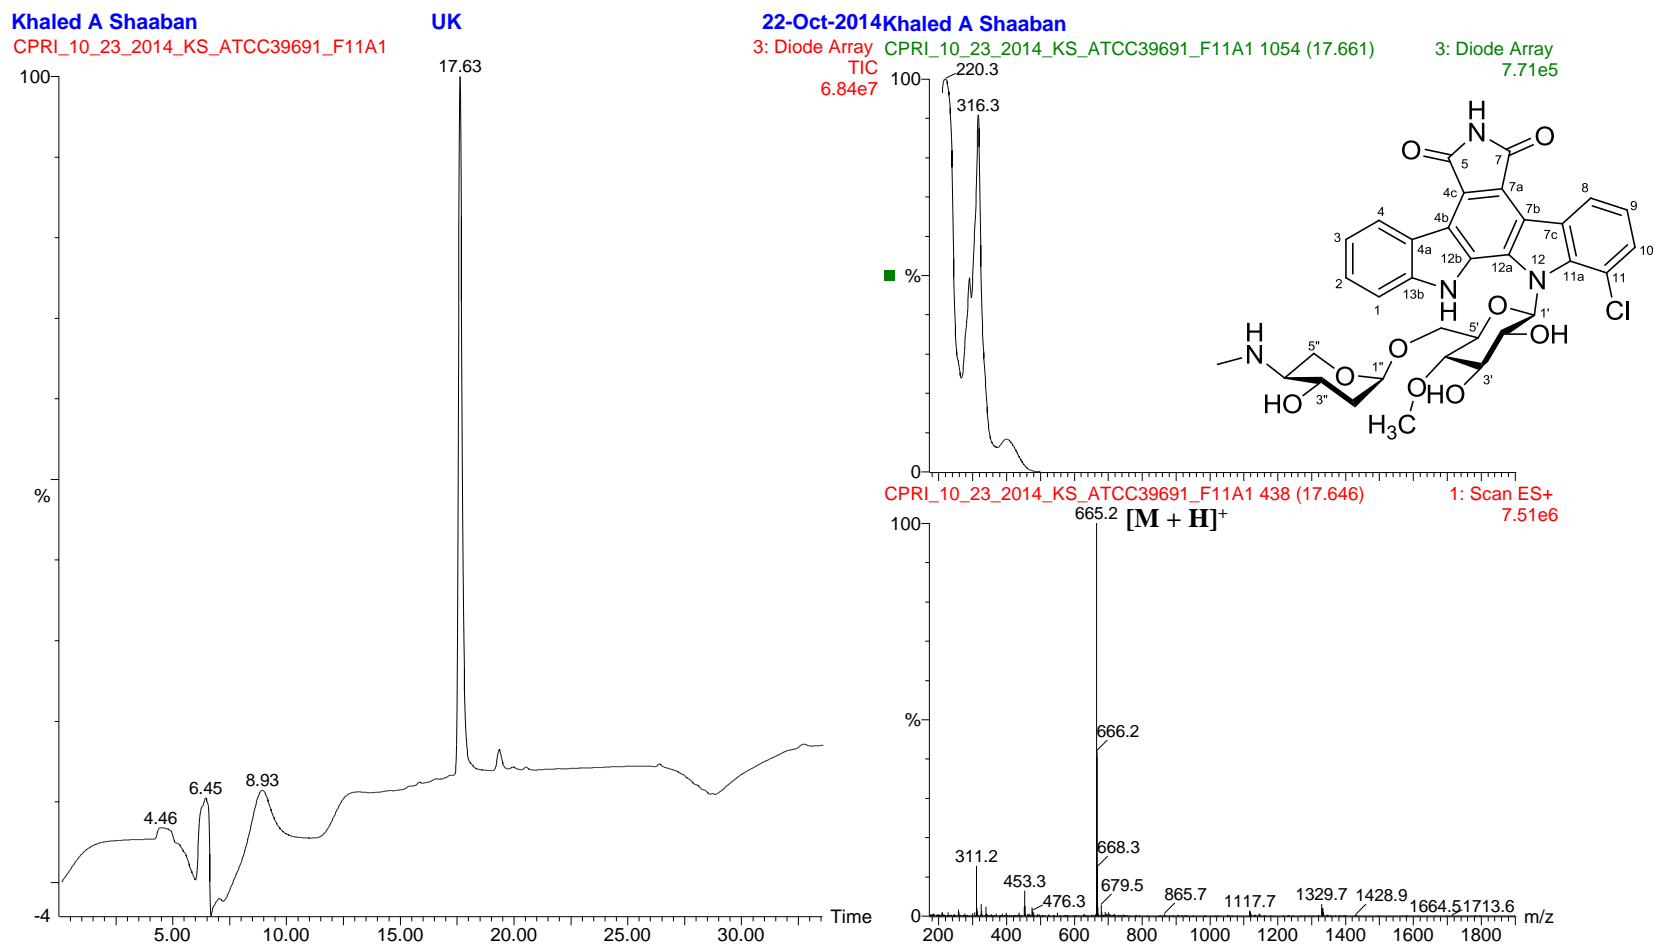

**Figure S5.** HPLC/UV/MS analyses of the purified AT2433-A3 (1). Detection wavelength: 210-500; **solvent A:** H<sub>2</sub>O/0.1% Formic acid, **solvent B:** CH<sub>3</sub>CN/0.1% Formic acid; flow rate: 0.5 mL min<sup>-1</sup>; 0-4 min, 10% B; 4-22 min, 10-100% B; 22-27 min, 100% B; 27-29 min, 100%-10% B; 29-35 min, 10 % B.

14-0527 #64-67 RT: 1.68-1.76 AV: 4 NL: 1.79E8  
T: FTMS + p ESI Full ms [300.00-1000.00]

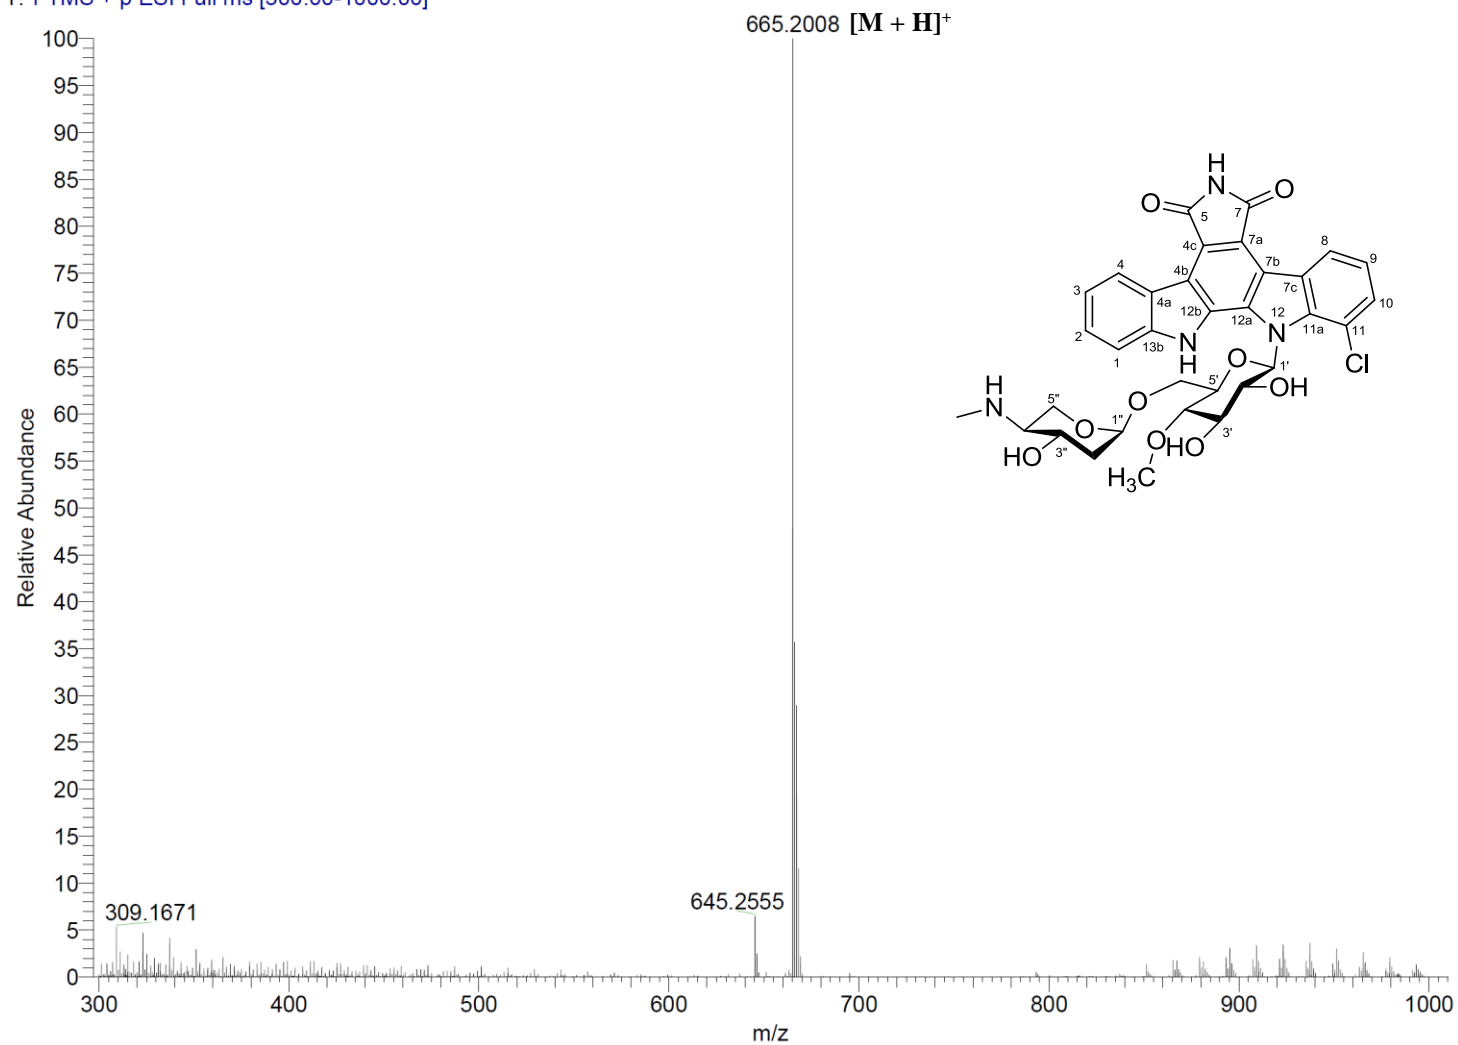

**Figure S6.** (+)-HRESI-MS spectrum of AT2433-A3 (**1**)



14-0527 #50-57 RT: 1.31-1.50 AV: 8 NL: 4.72E5  
T: FTMS - p ESI Full ms [300.00-1000.00]

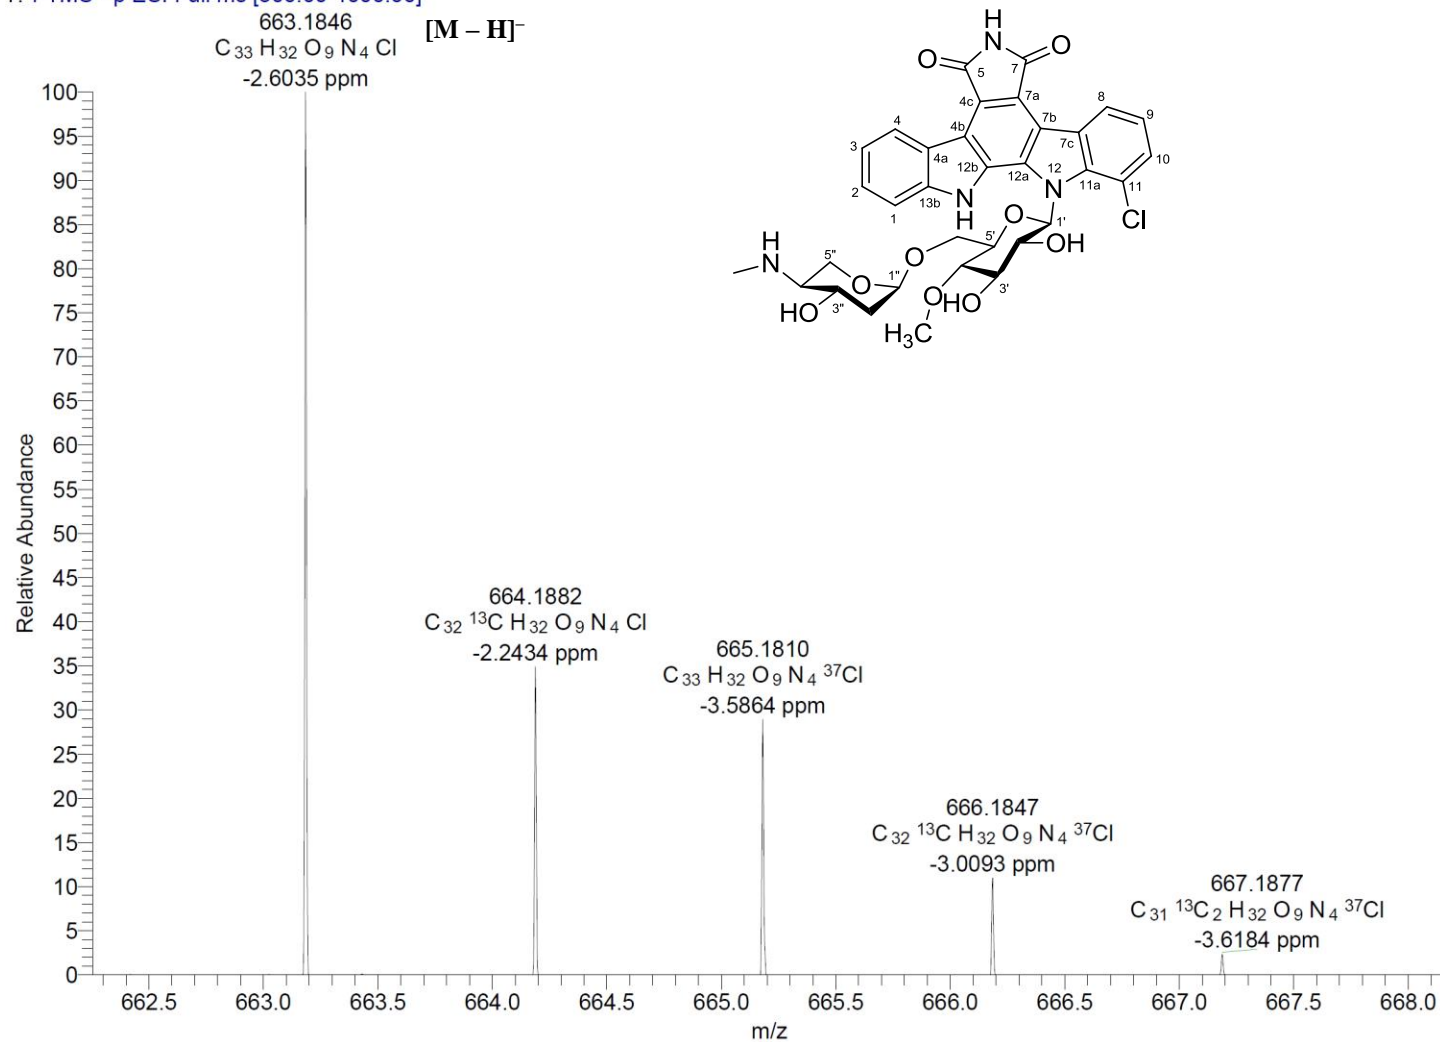

Figure S7. (-)-HRESI-MS spectrum of AT2433-A3 (1)

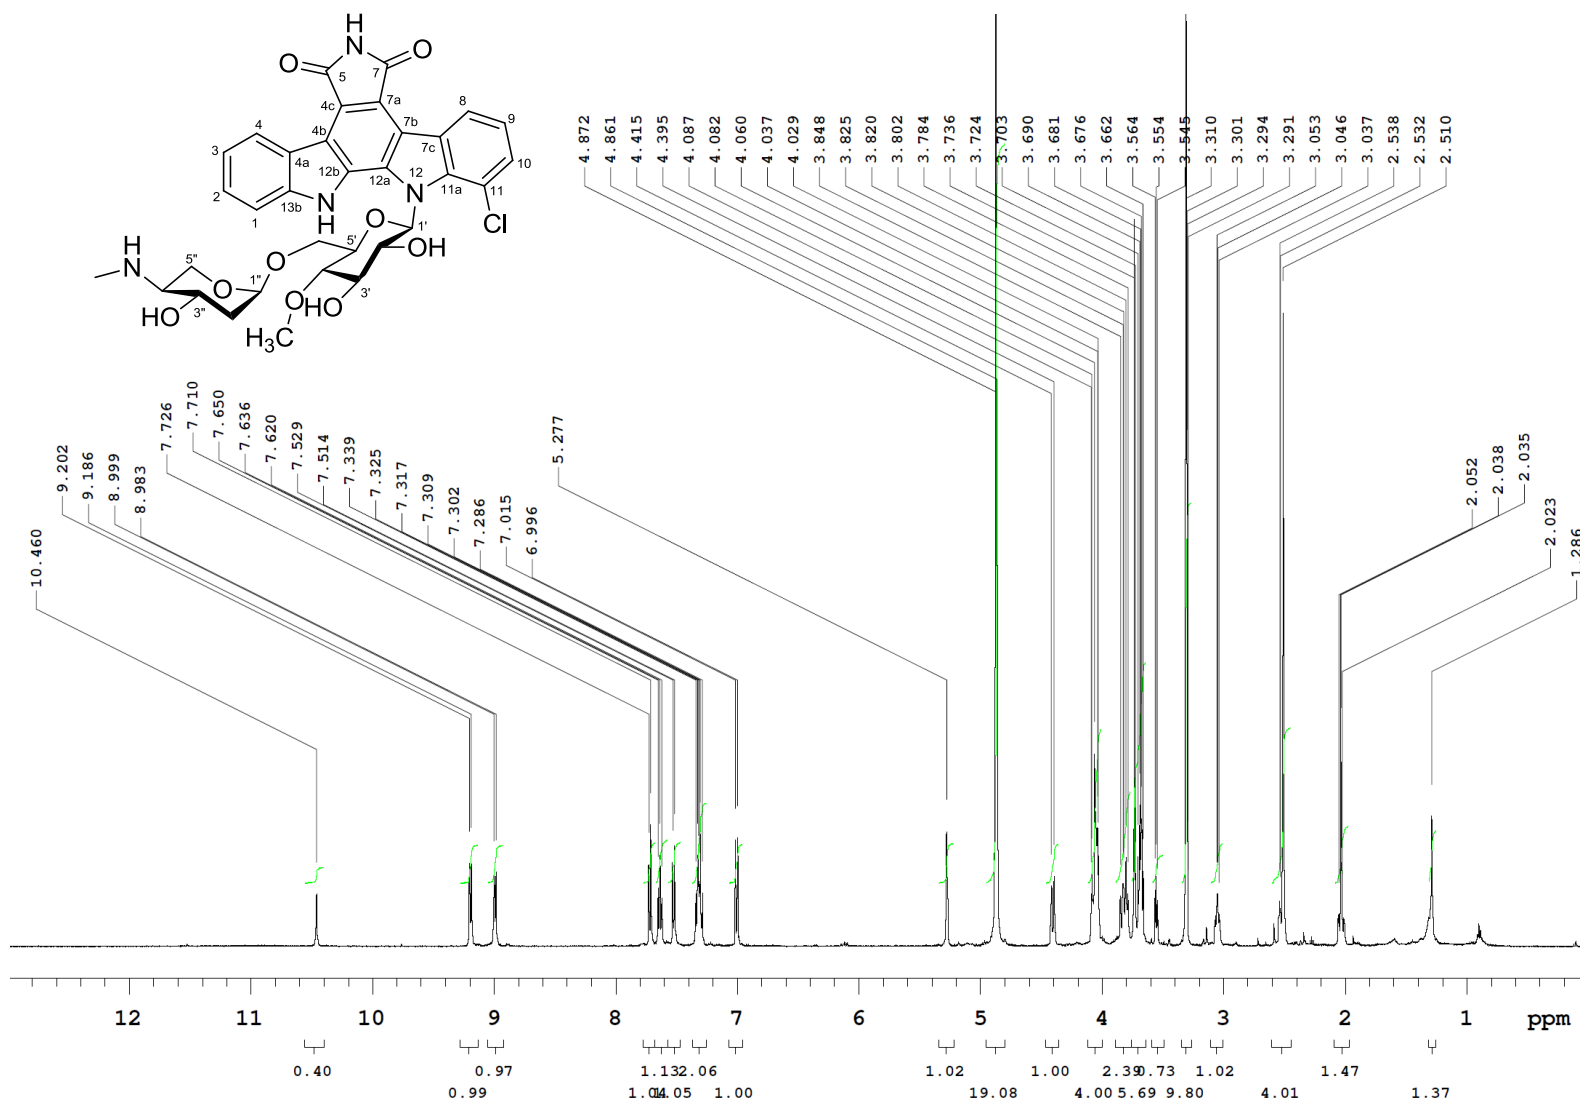

**Figure S8.** <sup>1</sup>H NMR spectrum (CD<sub>3</sub>OD, 500 MHz) of AT2433-A3 (**1**)

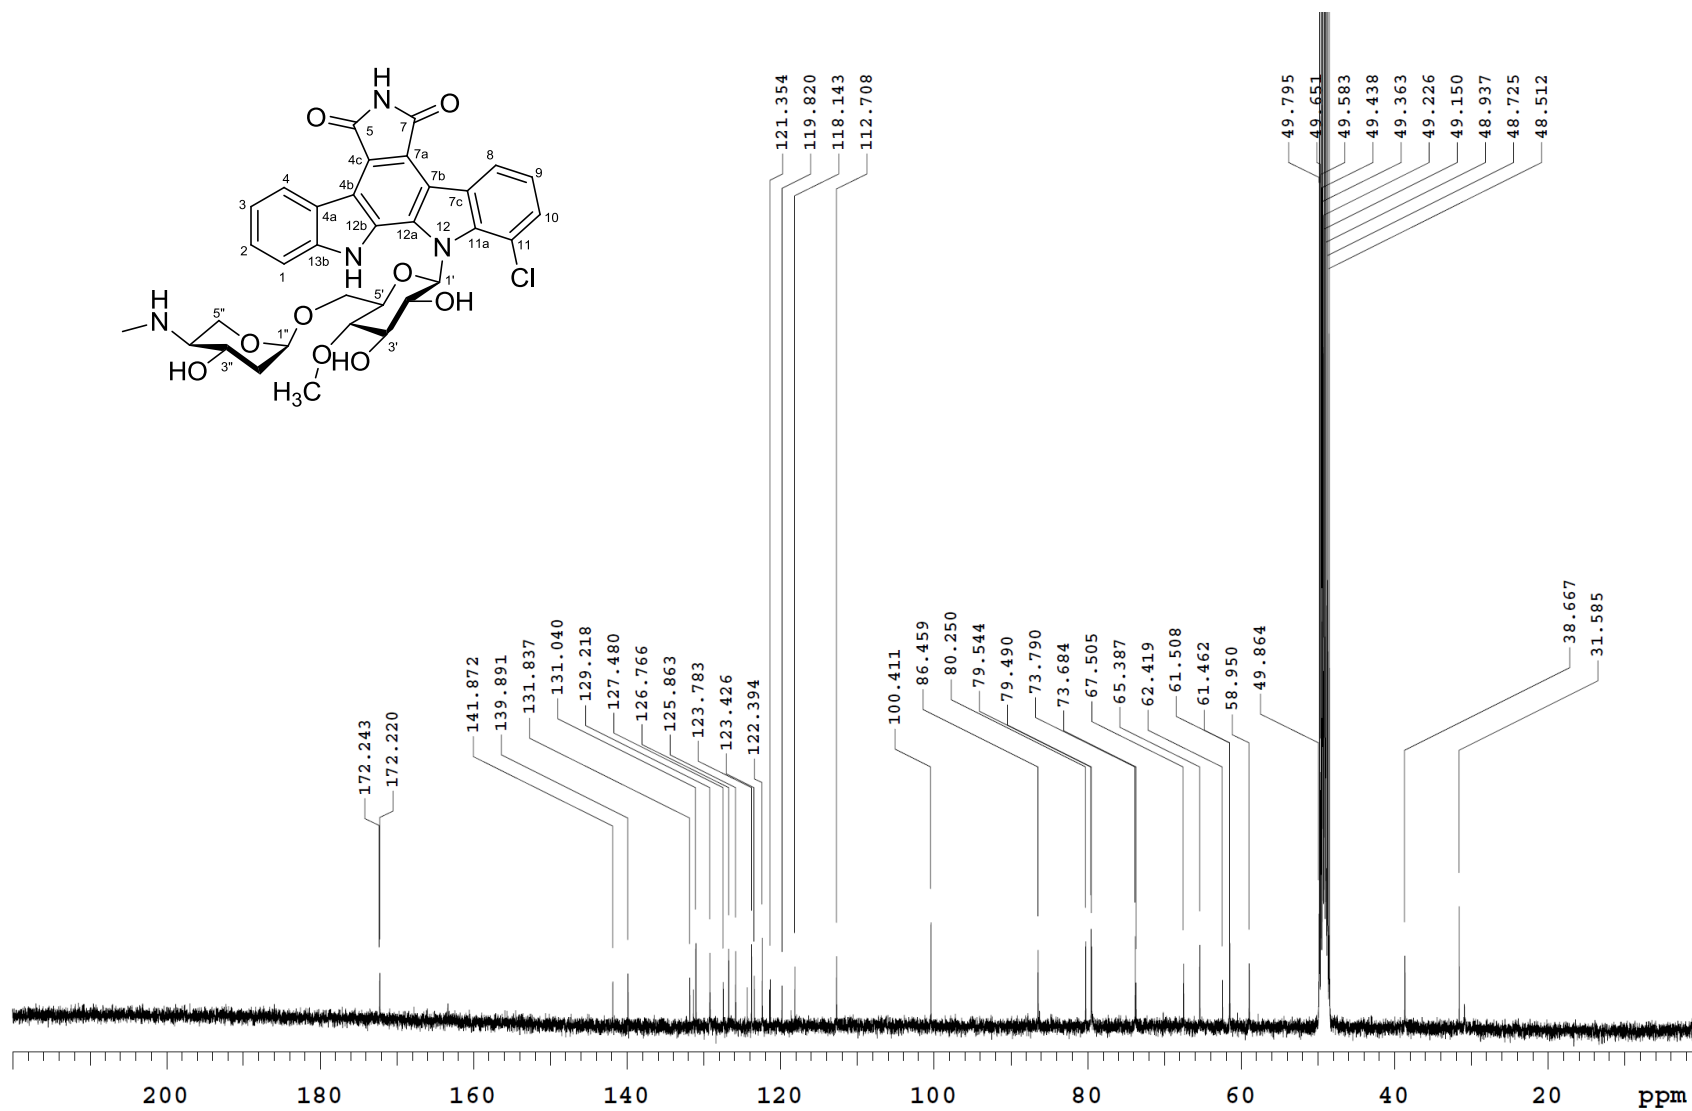

**Figure S9.** <sup>13</sup>C NMR spectrum (CD<sub>3</sub>OD, 100 MHz) of AT2433-A3 (**1**)

500 MHz, CD3OD, 80 min  
Khaled A. Shaaban

Sample: Khaled\_A\_Shaaban  
File: xp

Pulse Sequence: gCOSY

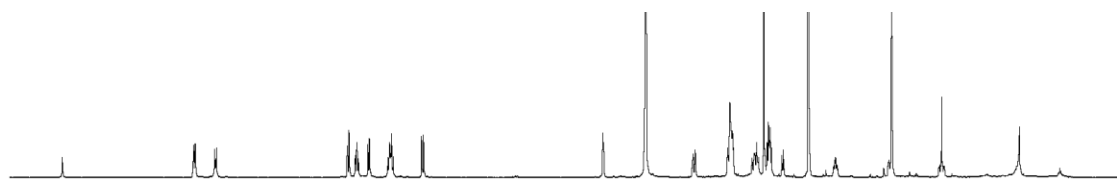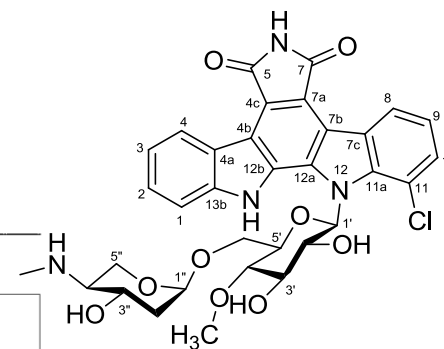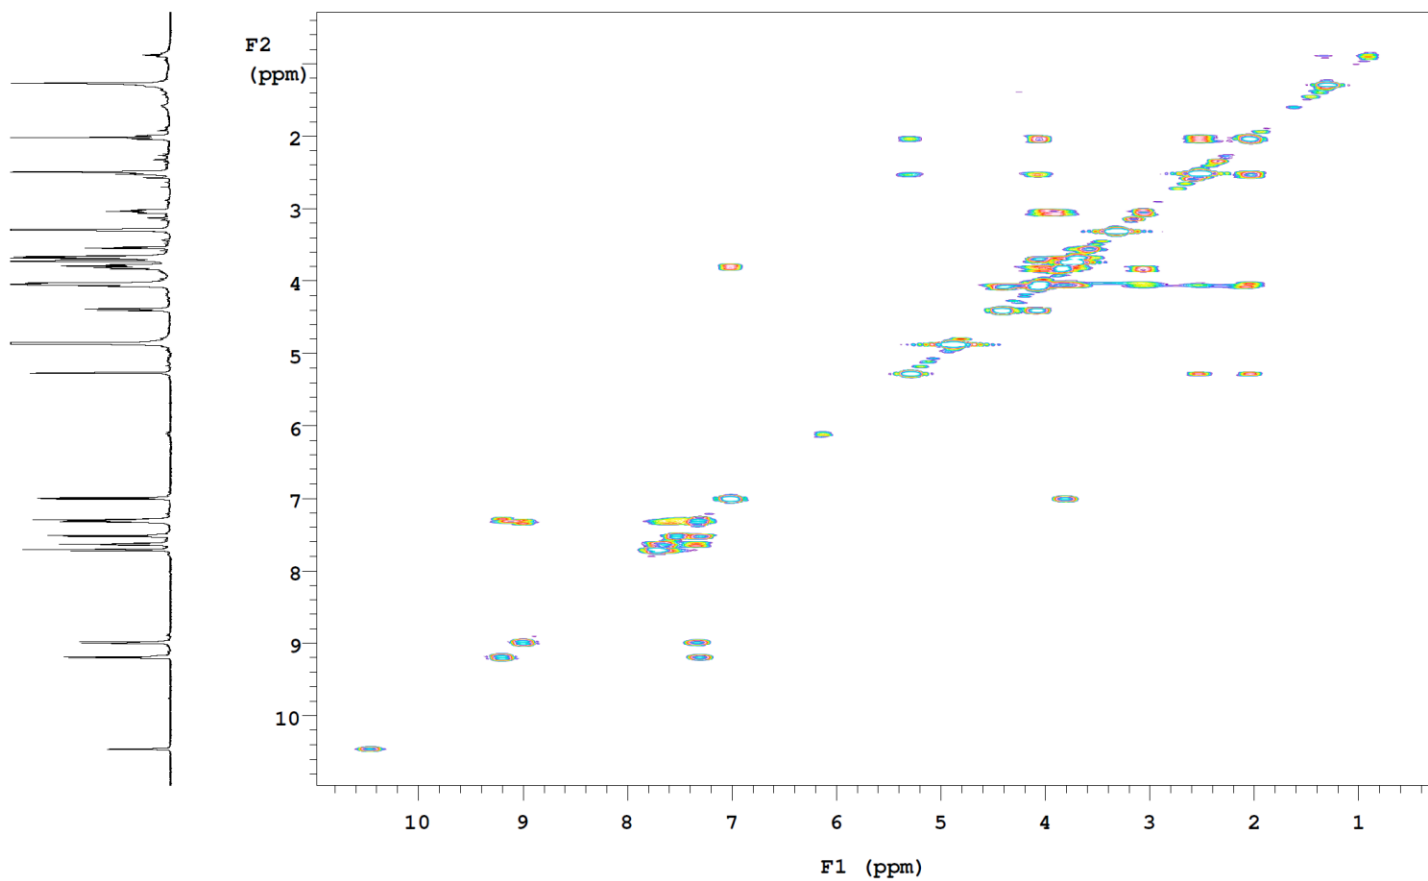

**Figure S10.**  $^1\text{H}$ - $^1\text{H}$  COSY spectrum (CD<sub>3</sub>OD, 500 MHz) of AT2433-A3 (**1**)

500 MHz, CD<sub>3</sub>OD, 4 hrs  
Khaled A. Shaaban

Sample: Khaled\_A\_Shaaban  
File: xp

Pulse Sequence: gHSQC

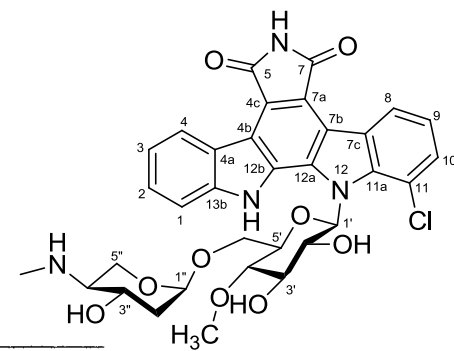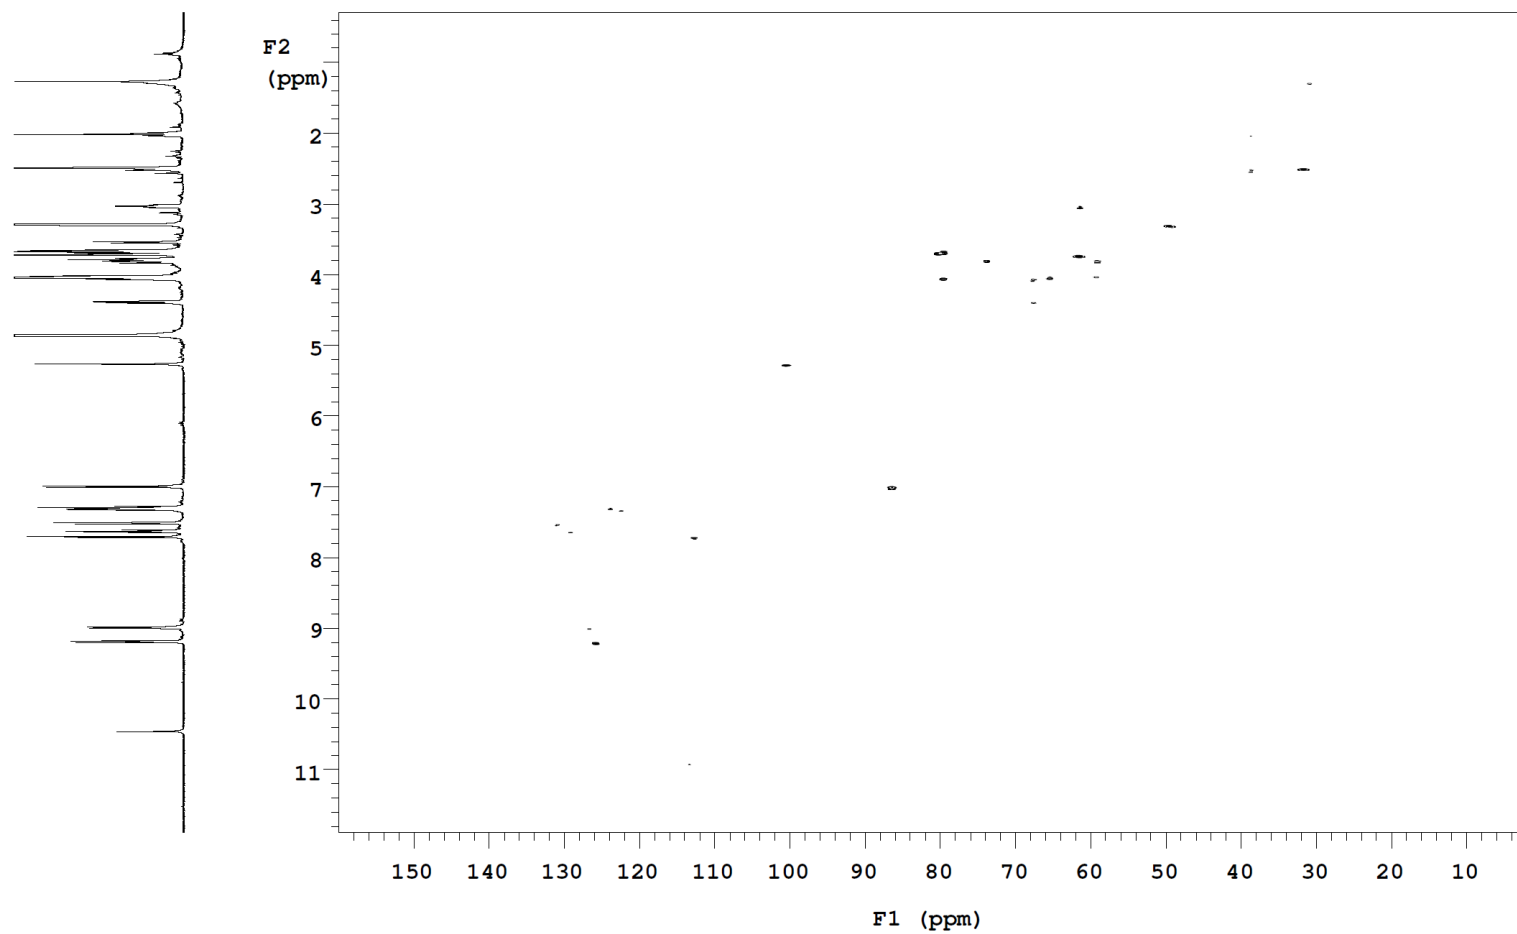

**Figure S11.** HSQC spectrum (CD<sub>3</sub>OD, 500 MHz) of AT2433-A3 (**1**)

500 MHz, CD3OD, 45 hrs  
Khaled A. Shaaban

Sample: Khaled\_A\_Shaaban  
File: xp

Pulse Sequence: gHMBC

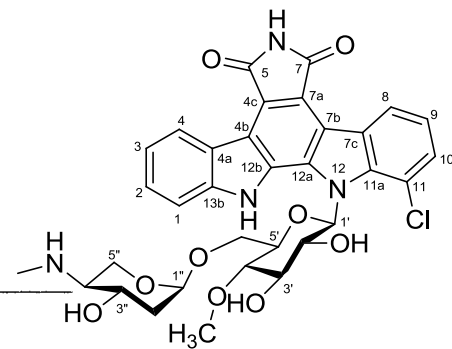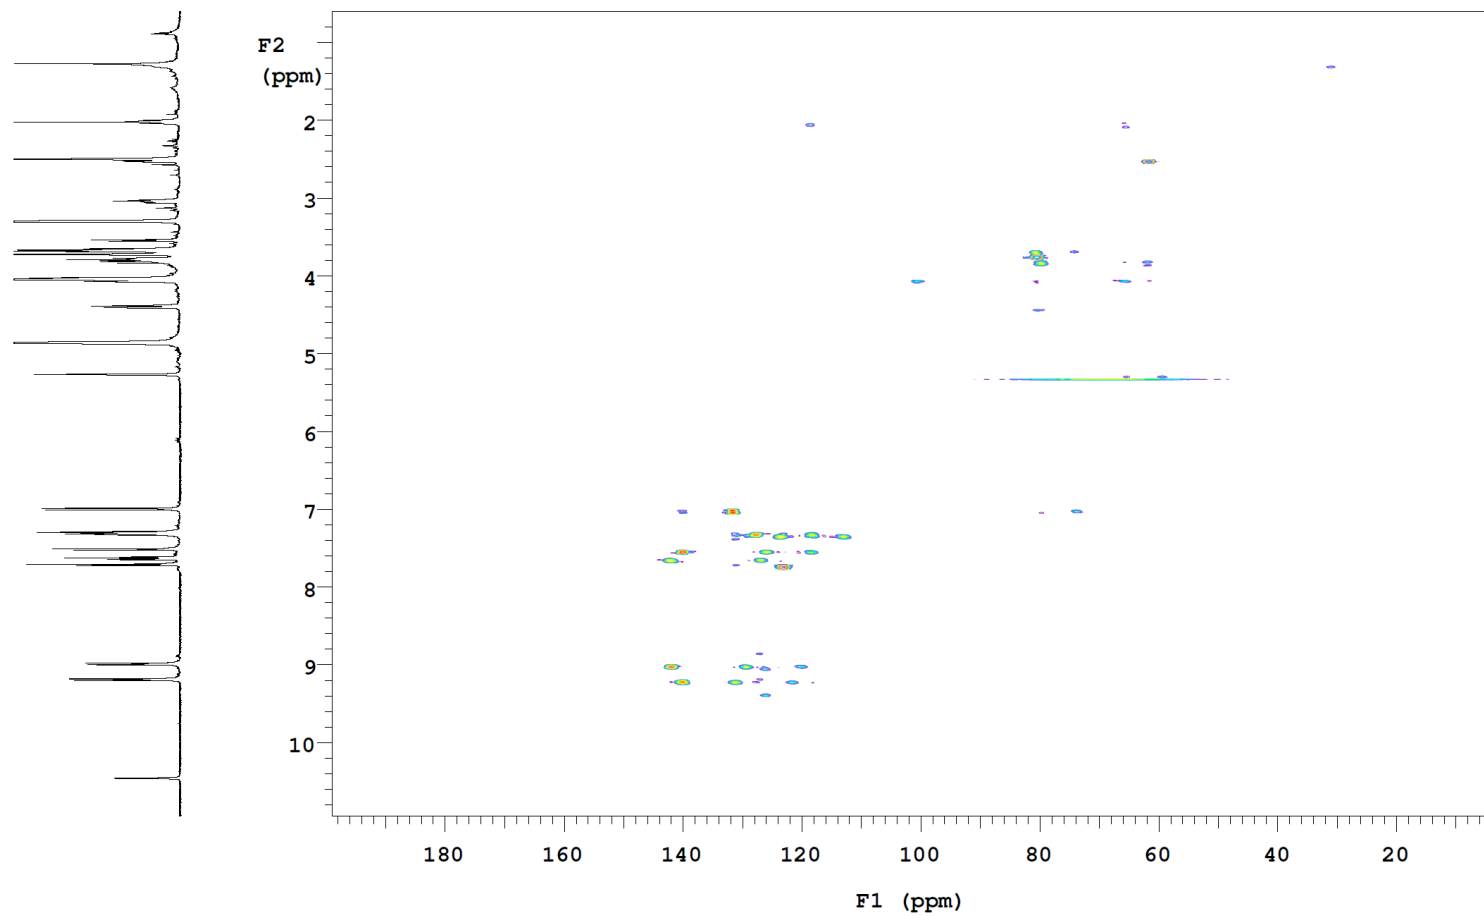

**Figure S12.** HMBC spectrum (CD<sub>3</sub>OD, 500 MHz) of AT2433-A3 (**1**)

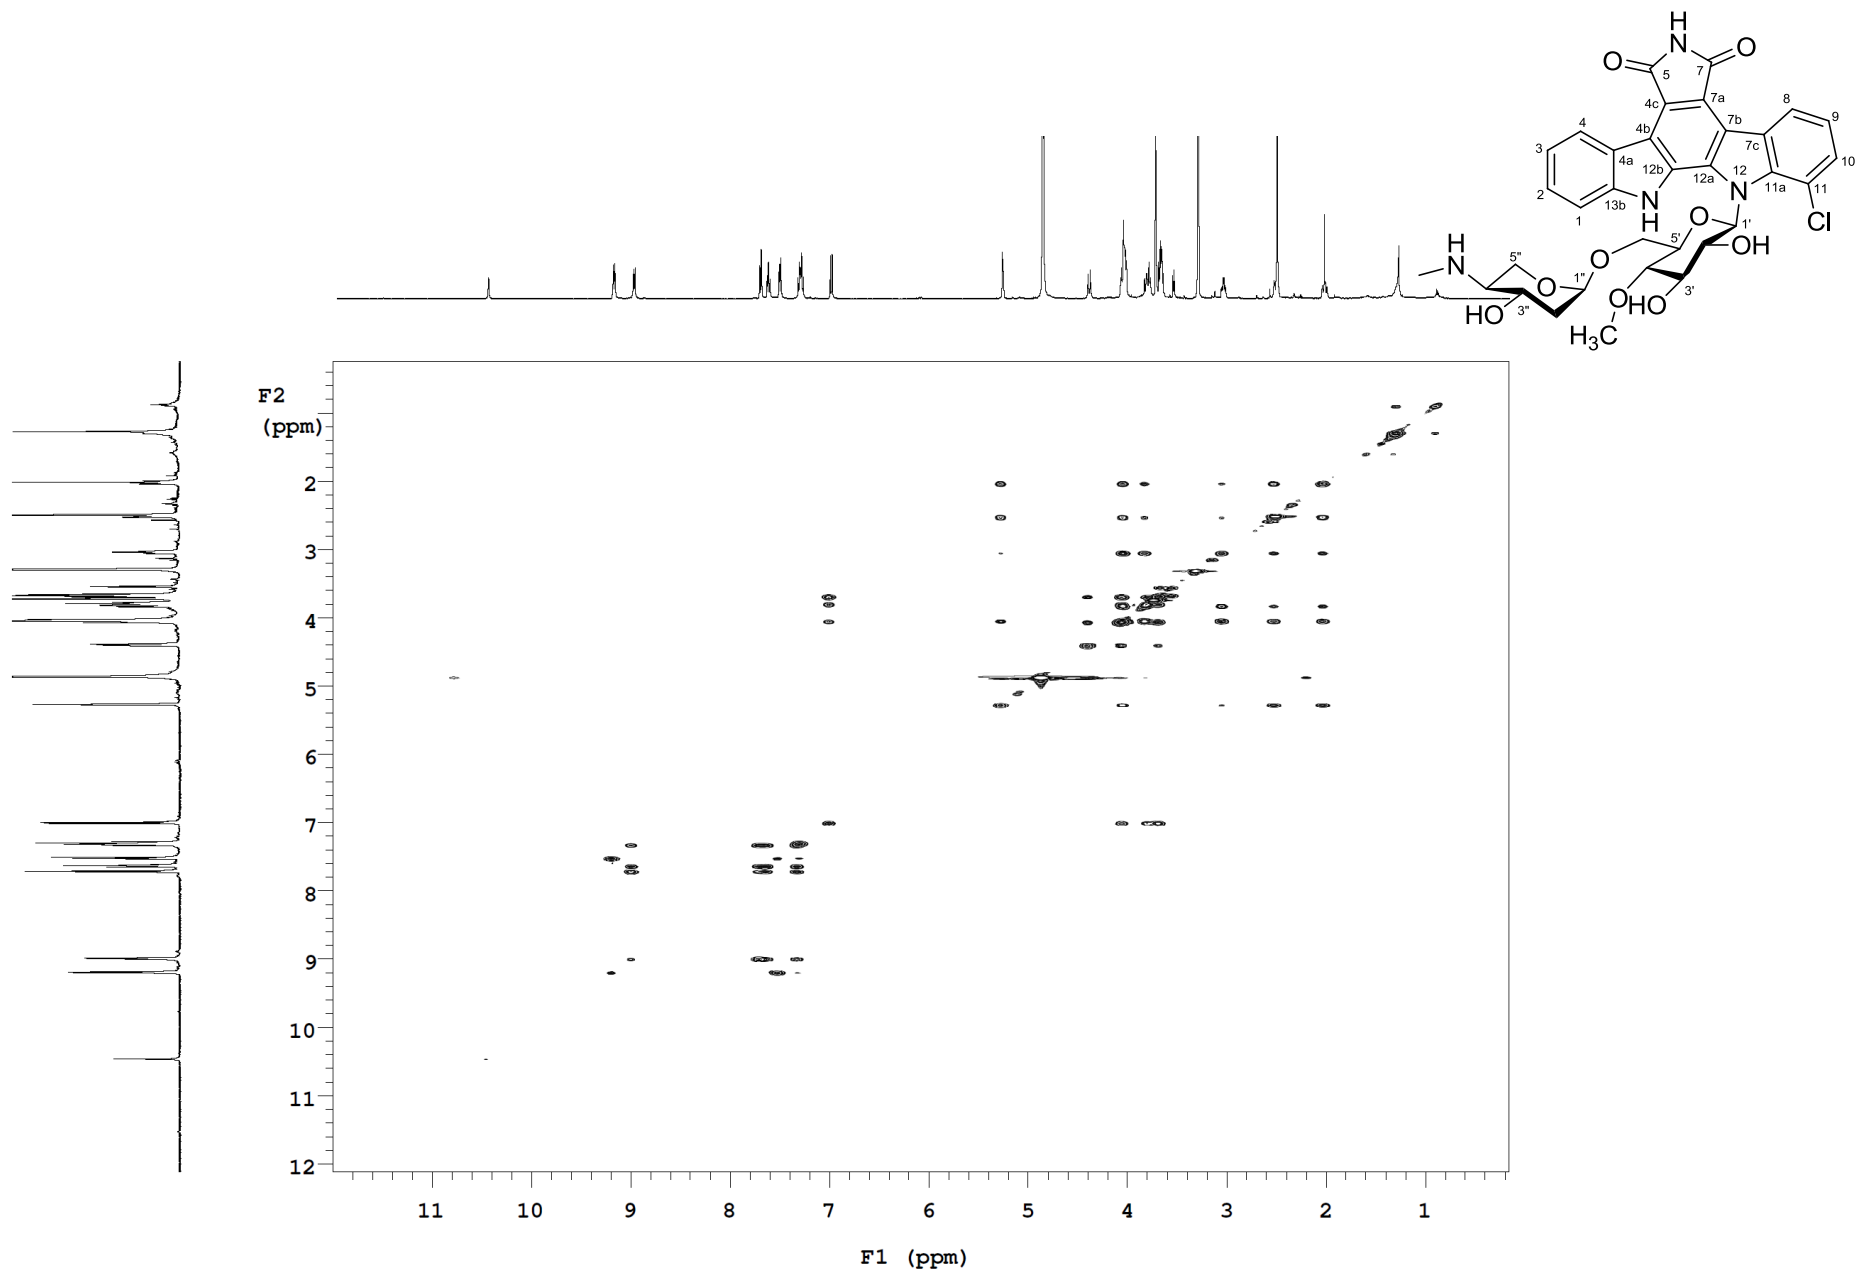

**Figure S13.** TOCSY spectrum (CD<sub>3</sub>OD, 500 MHz) of AT2433-A3 (**1**)

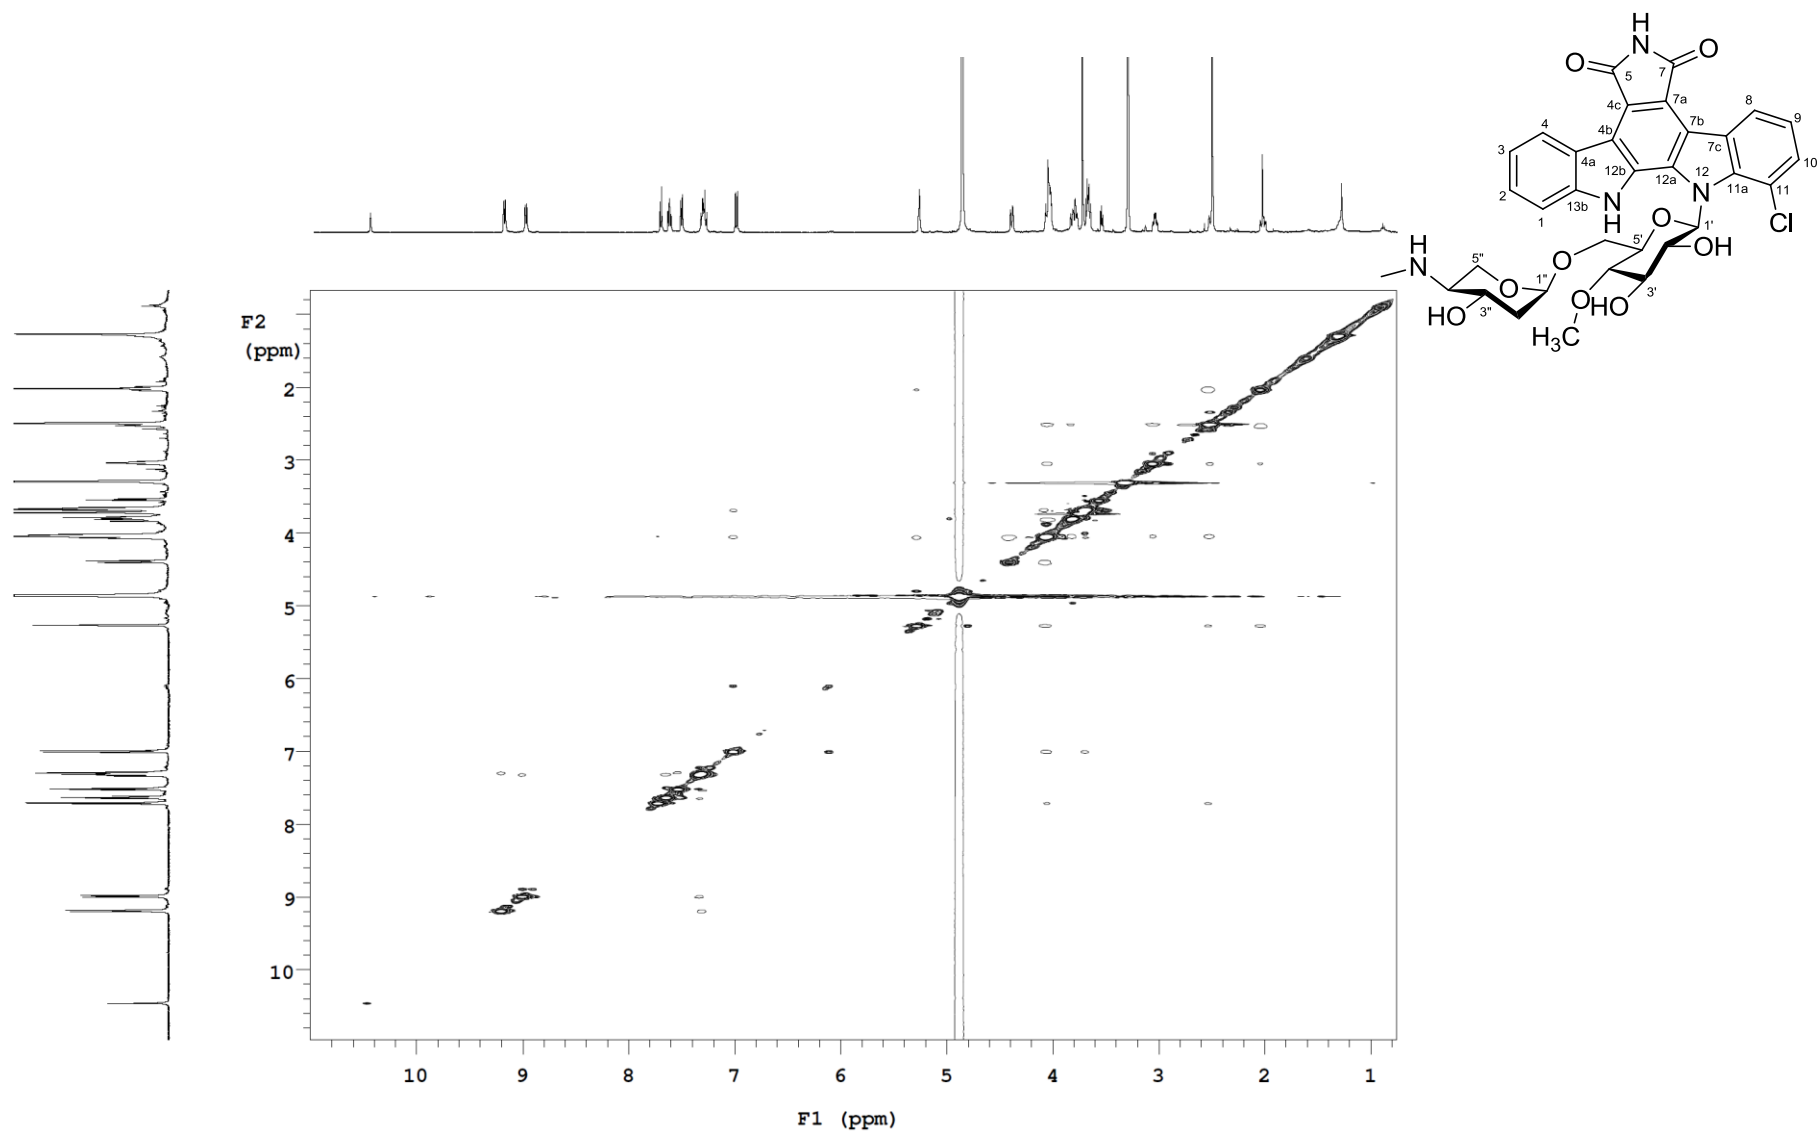

**Figure S14.** NOESY spectrum (CD<sub>3</sub>OD, 500 MHz) of AT2433-A3 (**1**)



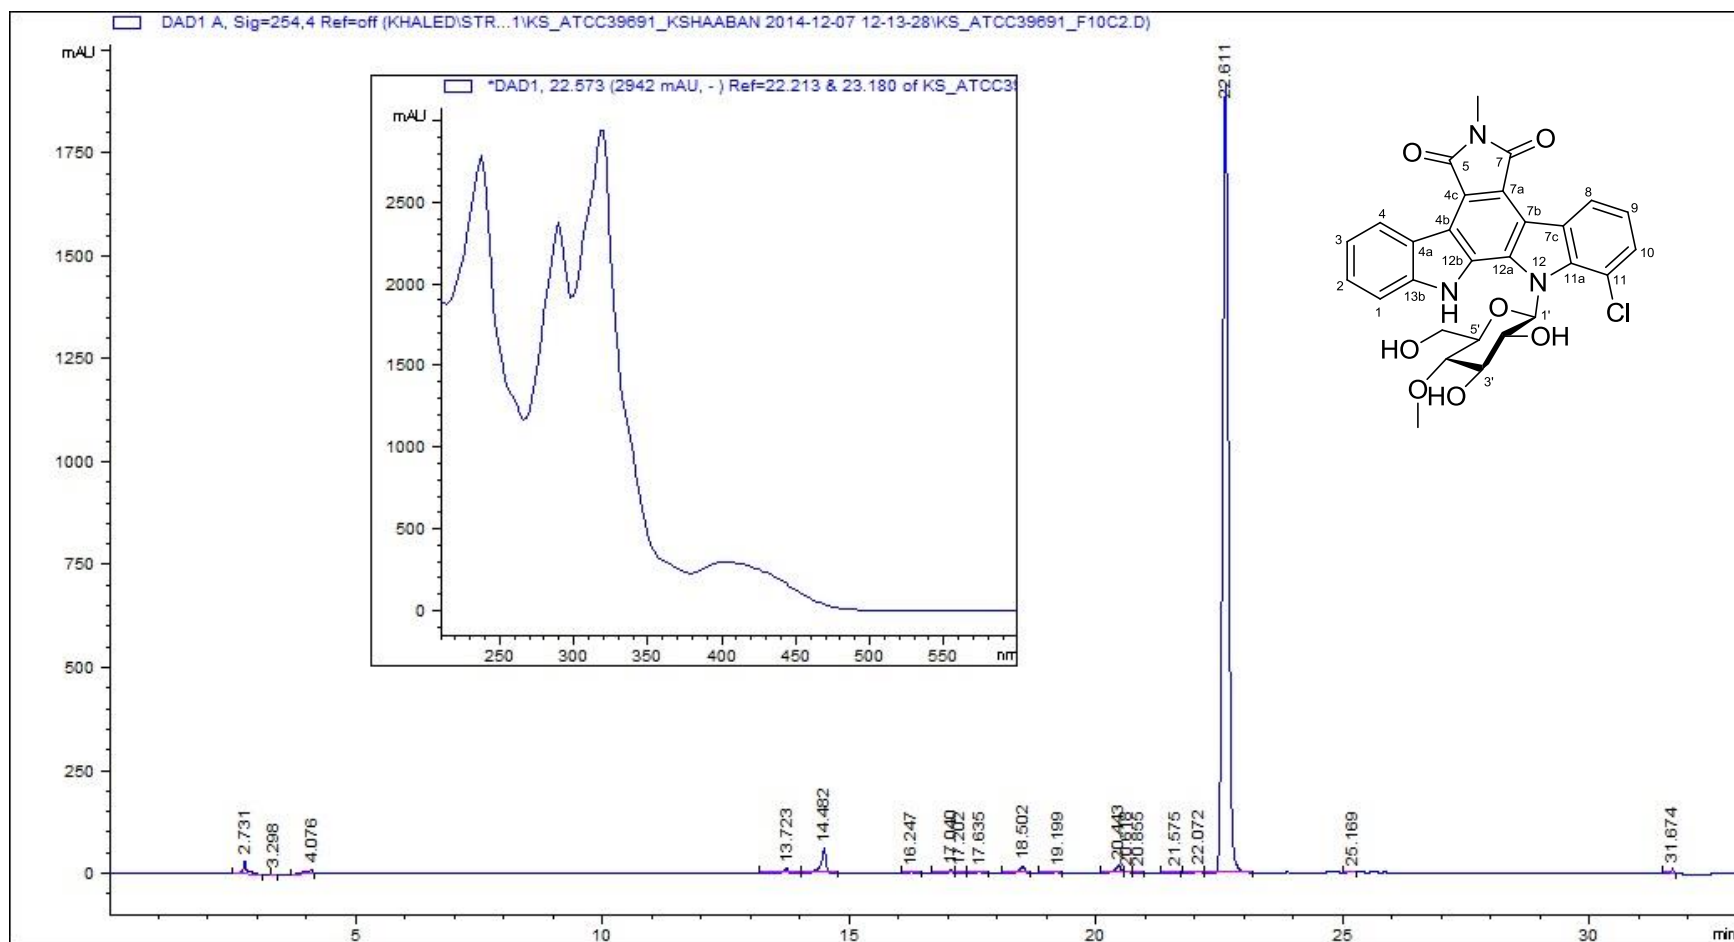

**Figure S15.** HPLC of AT2433-A4 (2). HPLC-conditions: Detection wavelength 254 nm; **solvent A:** H<sub>2</sub>O/0.1% TFA; **solvent B:** CH<sub>3</sub>CN; flow rate: 0.5 mL min<sup>-1</sup>; 0-4 min, 10% B; 4-22 min, 10-100% B; 22-27 min, 100% B; 27-29 min, 100%-10% B; 29-35 min, 10 % B. UV-vis inset of full wavelength 190-600 nm.

14-0575 #19-38 RT: 0.50-0.99 AV: 20 NL: 3.06E6  
T: FTMS - p ESI Full ms [200.00-1000.00]

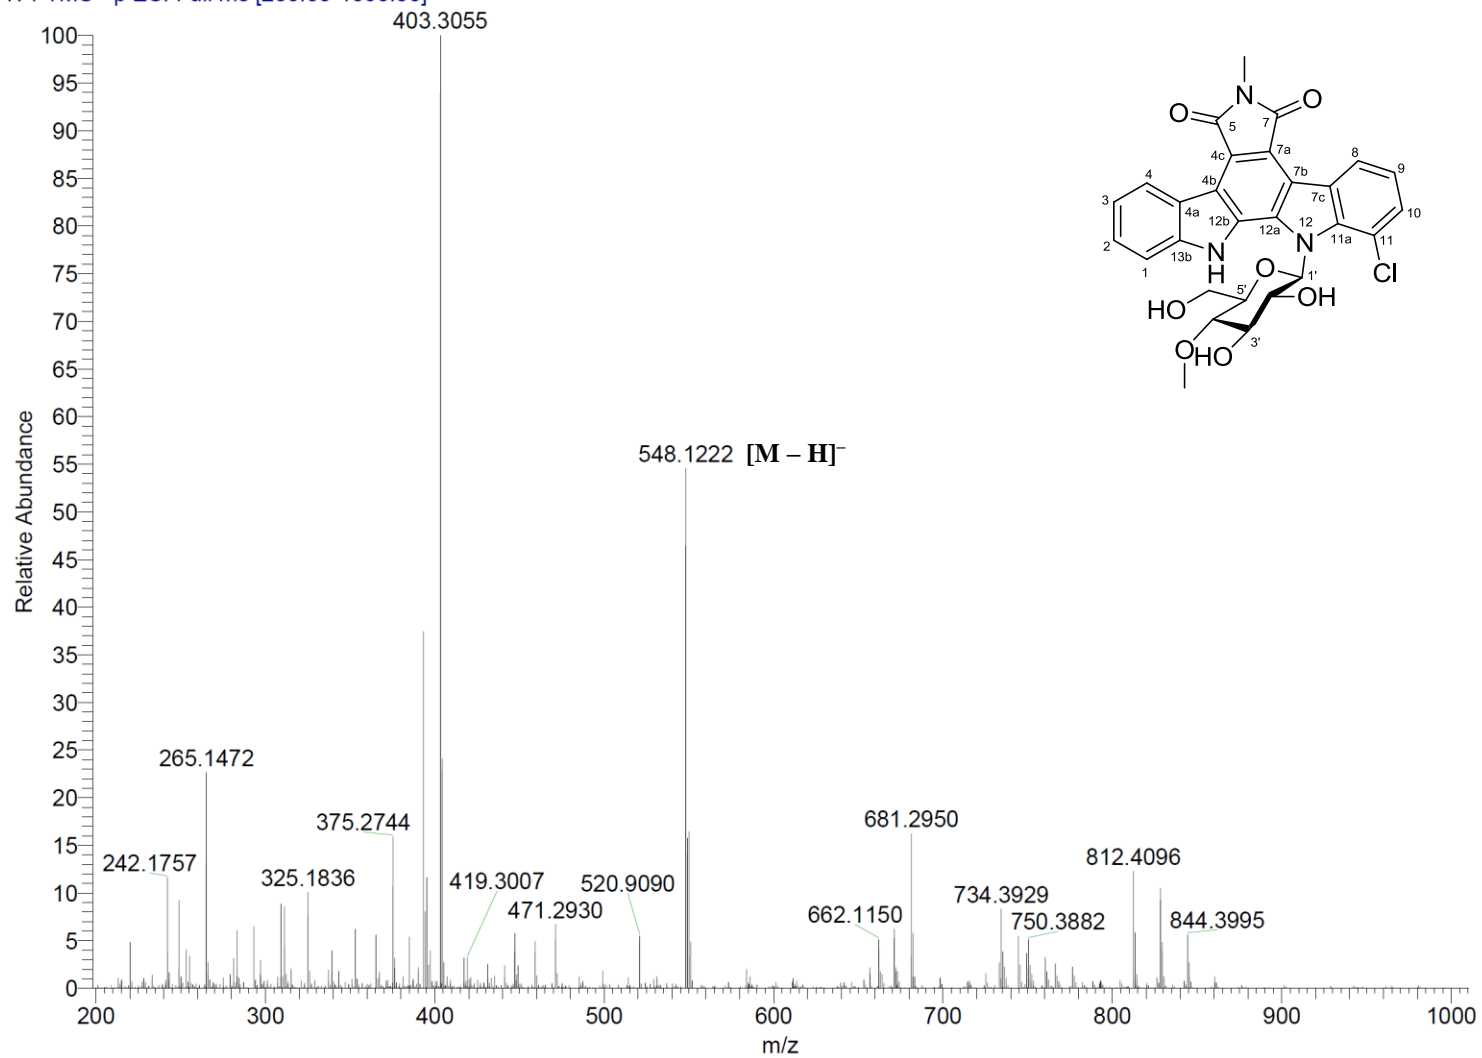

**Figure S16:** (-)-HRESI-MS spectrum of AT2433-A4 (**2**)

14-0575 #116-125 RT: 3.08-3.28 AV: 8 NL: 3.57E5  
T: FTMS + p ESI Full lock ms [200.00-1000.00]

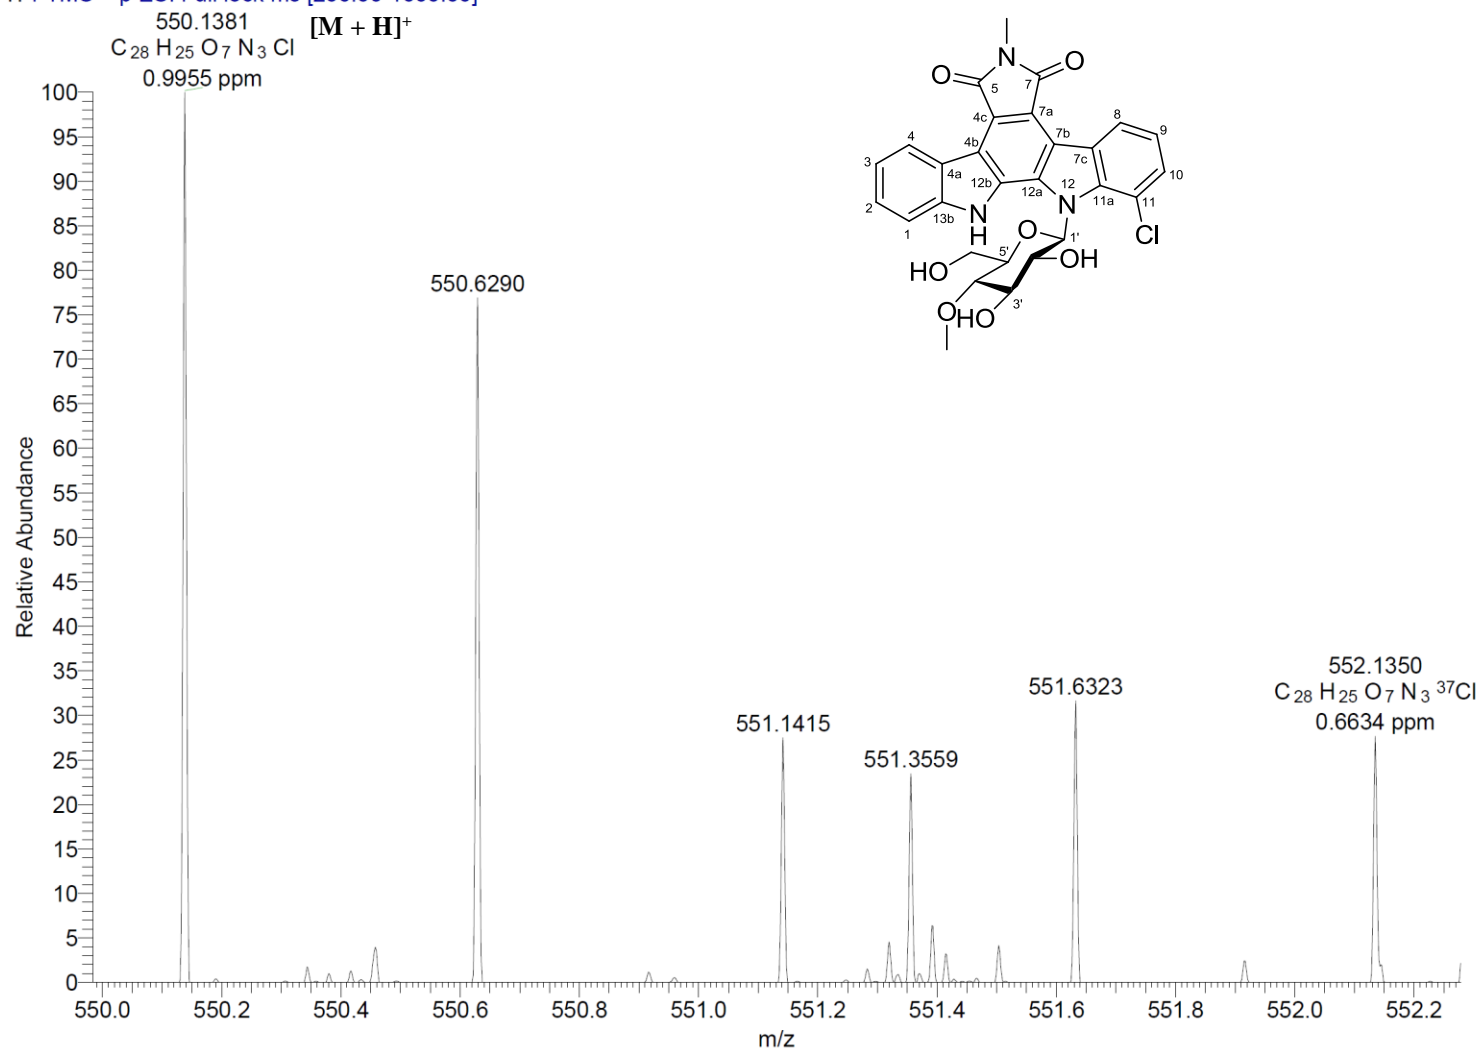

**Figure S17:** (+)-HRESI-MS spectrum of AT2433-A4 (2)

500 MHz, DMSO-d<sub>6</sub>, nt=256  
Khaled A. Shaaban

Sample: khaled\_A\_Shaaban  
File: xp

Pulse Sequence: s2pul

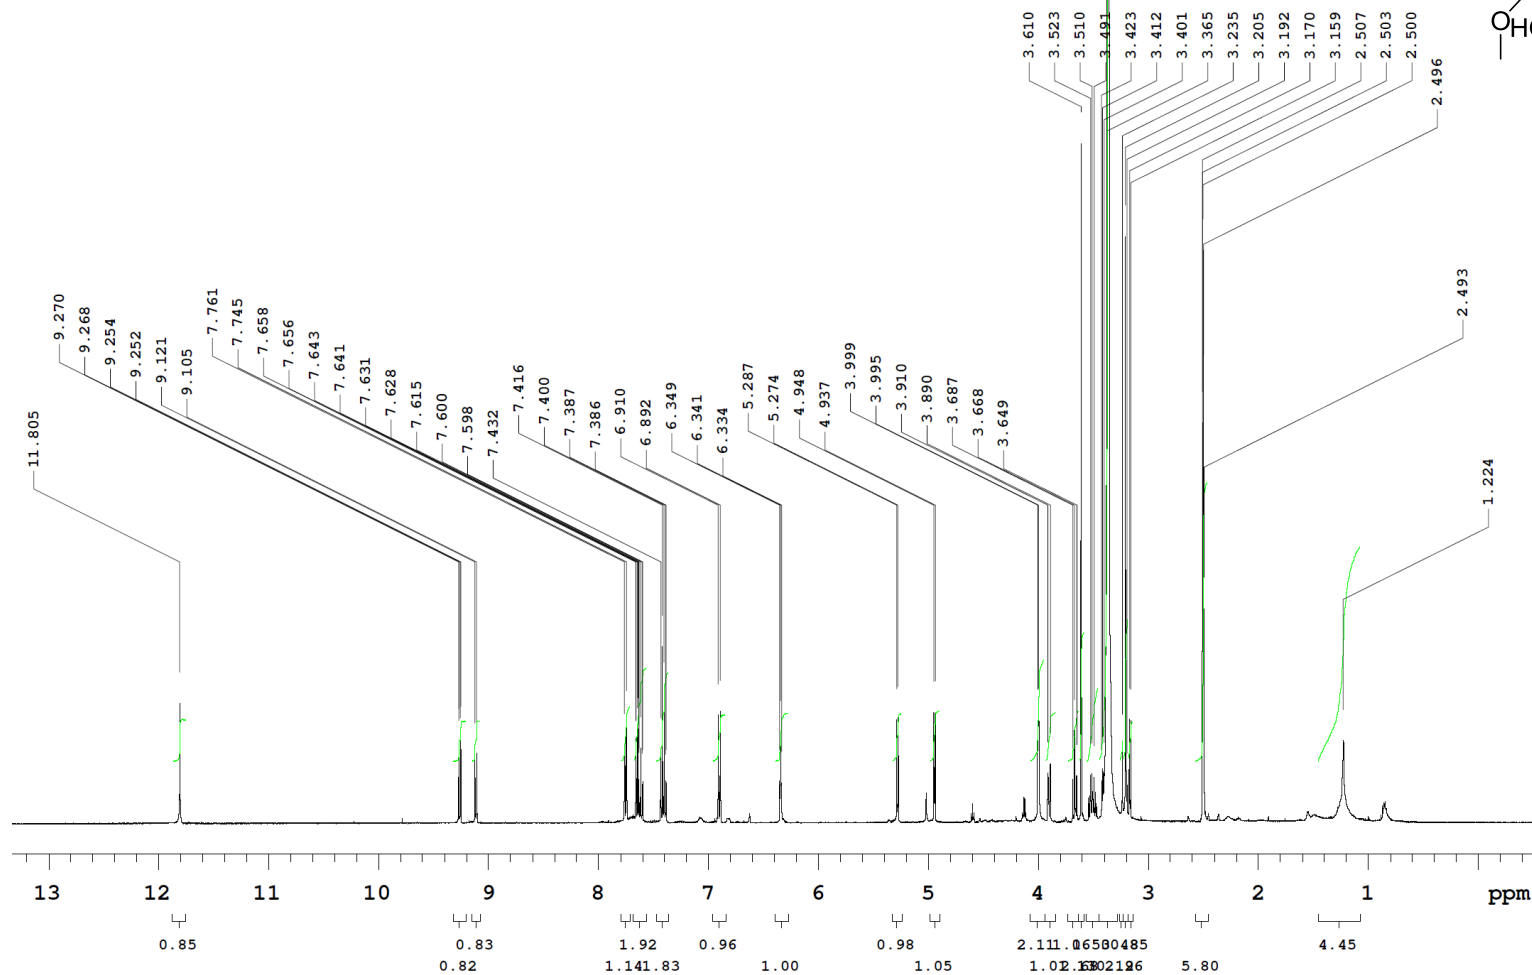

Figure S18: <sup>1</sup>H NMR spectrum (DMSO-d<sub>6</sub>, 500 MHz) of AT2433-A4 (2)

Khaled A. Shaaban, F10C2

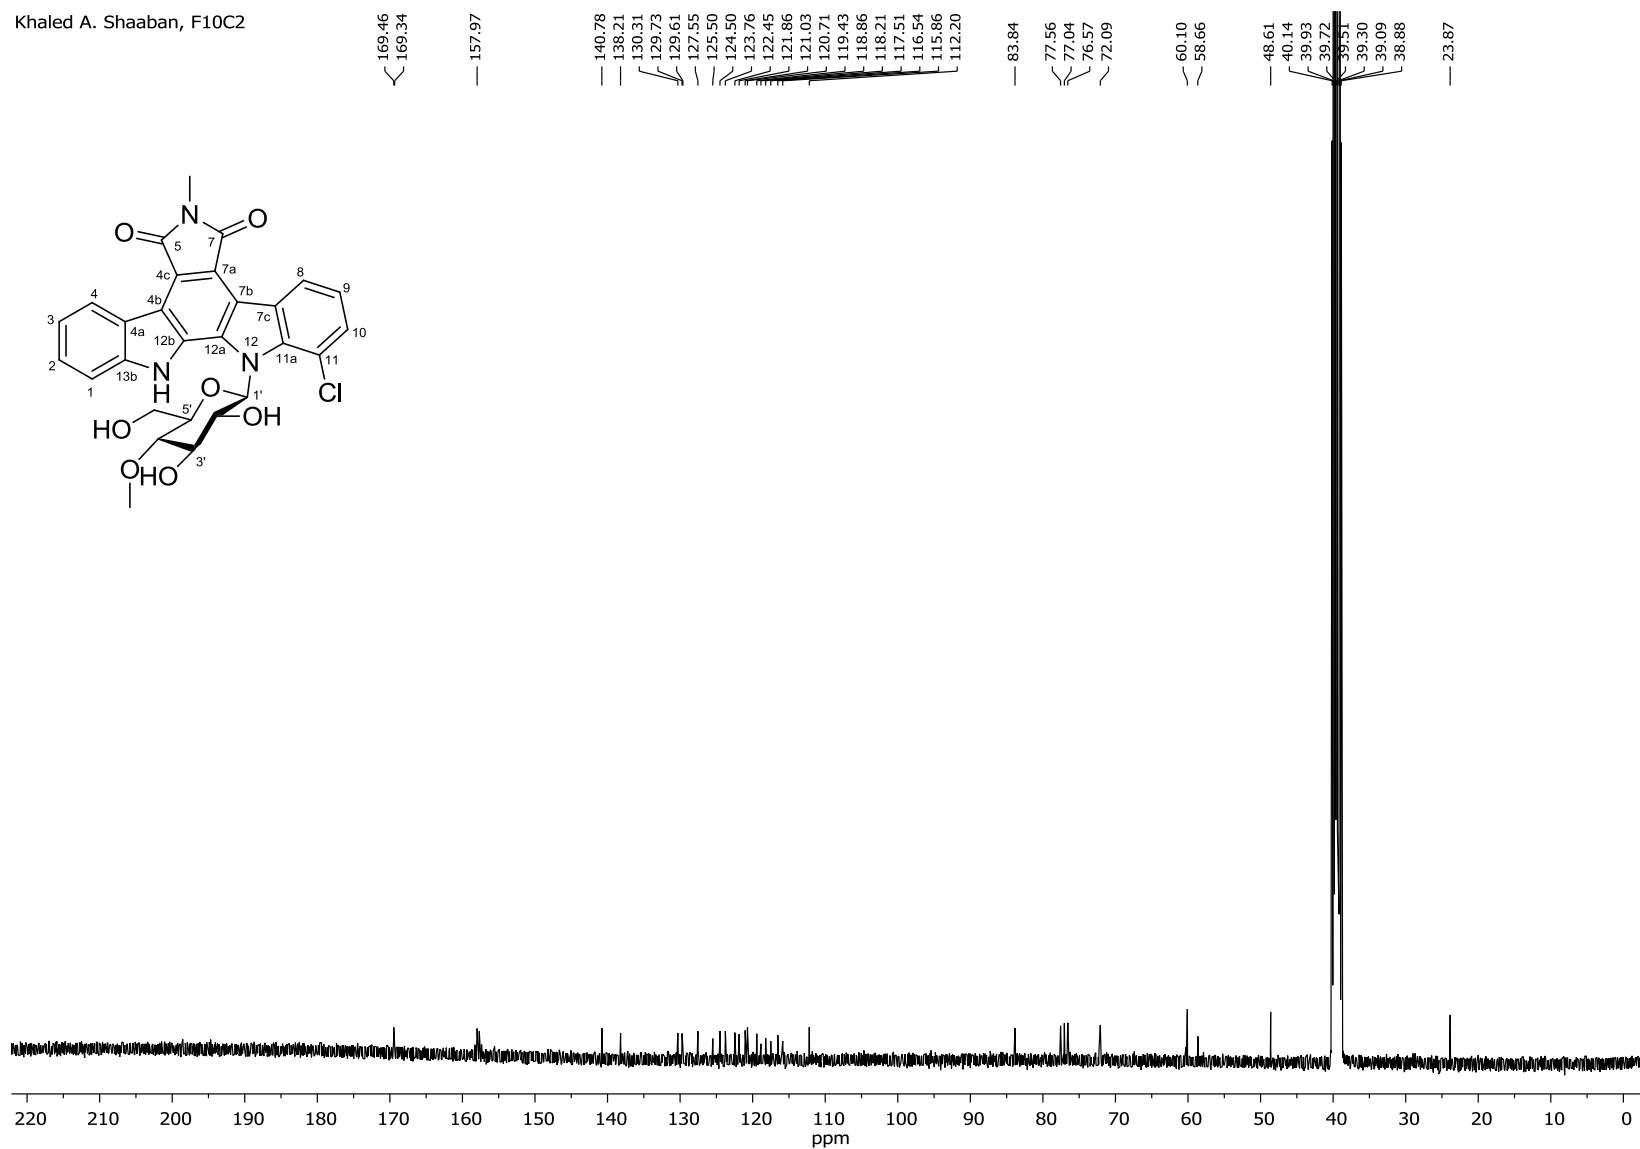

**Figure S19:**  $^{13}\text{C}$  NMR spectrum (DMSO- $d_6$ , 100 MHz) of AT2433-A4 (2)

500 MHz, DMSO-d<sub>6</sub>, 80 min  
Khaled A. Shaaban

Sample: khaled\_A\_Shaaban  
File: xp

Pulse Sequence: gCOSY

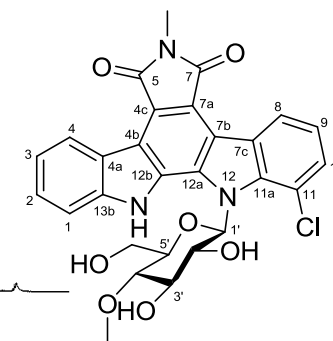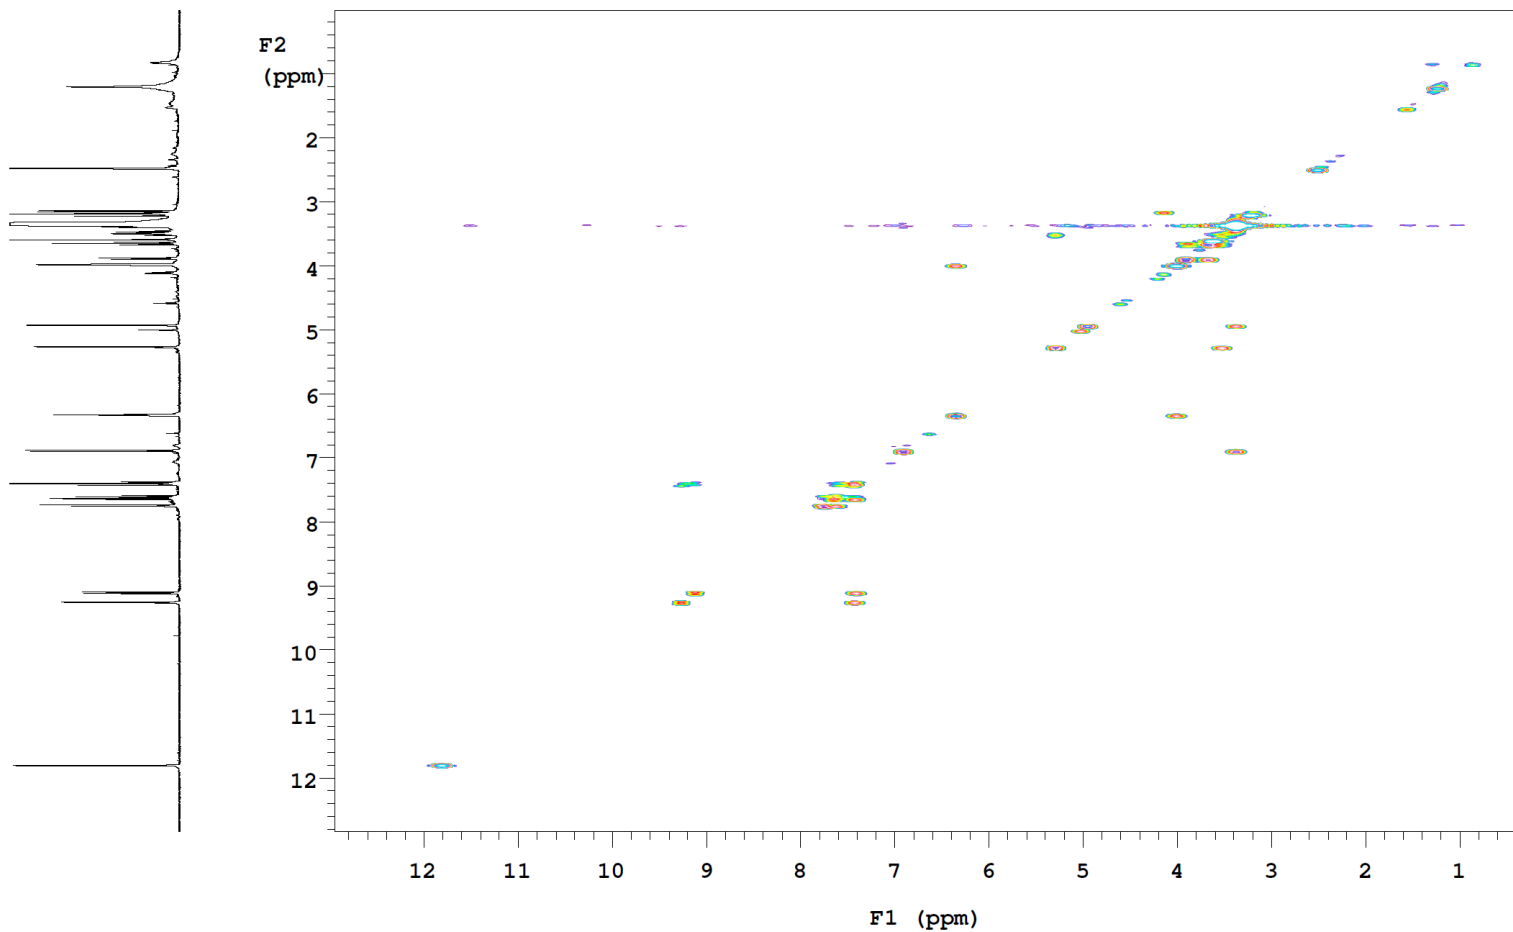

**Figure S20:**  $^1\text{H}$ - $^1\text{H}$  COSY spectrum (DMSO- $d_6$ , 500 MHz) of AT2433-A4 (2)

500 MHz, DMSO-d<sub>6</sub>, 5 hrs  
Khaled A. Shaaban

Sample: khaled\_A\_Shaaban  
File: xp

Pulse Sequence: gHSQC

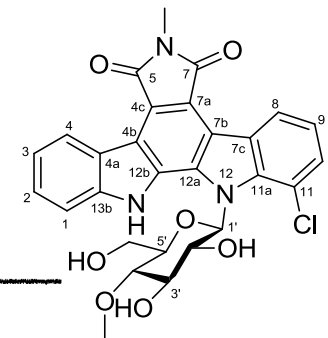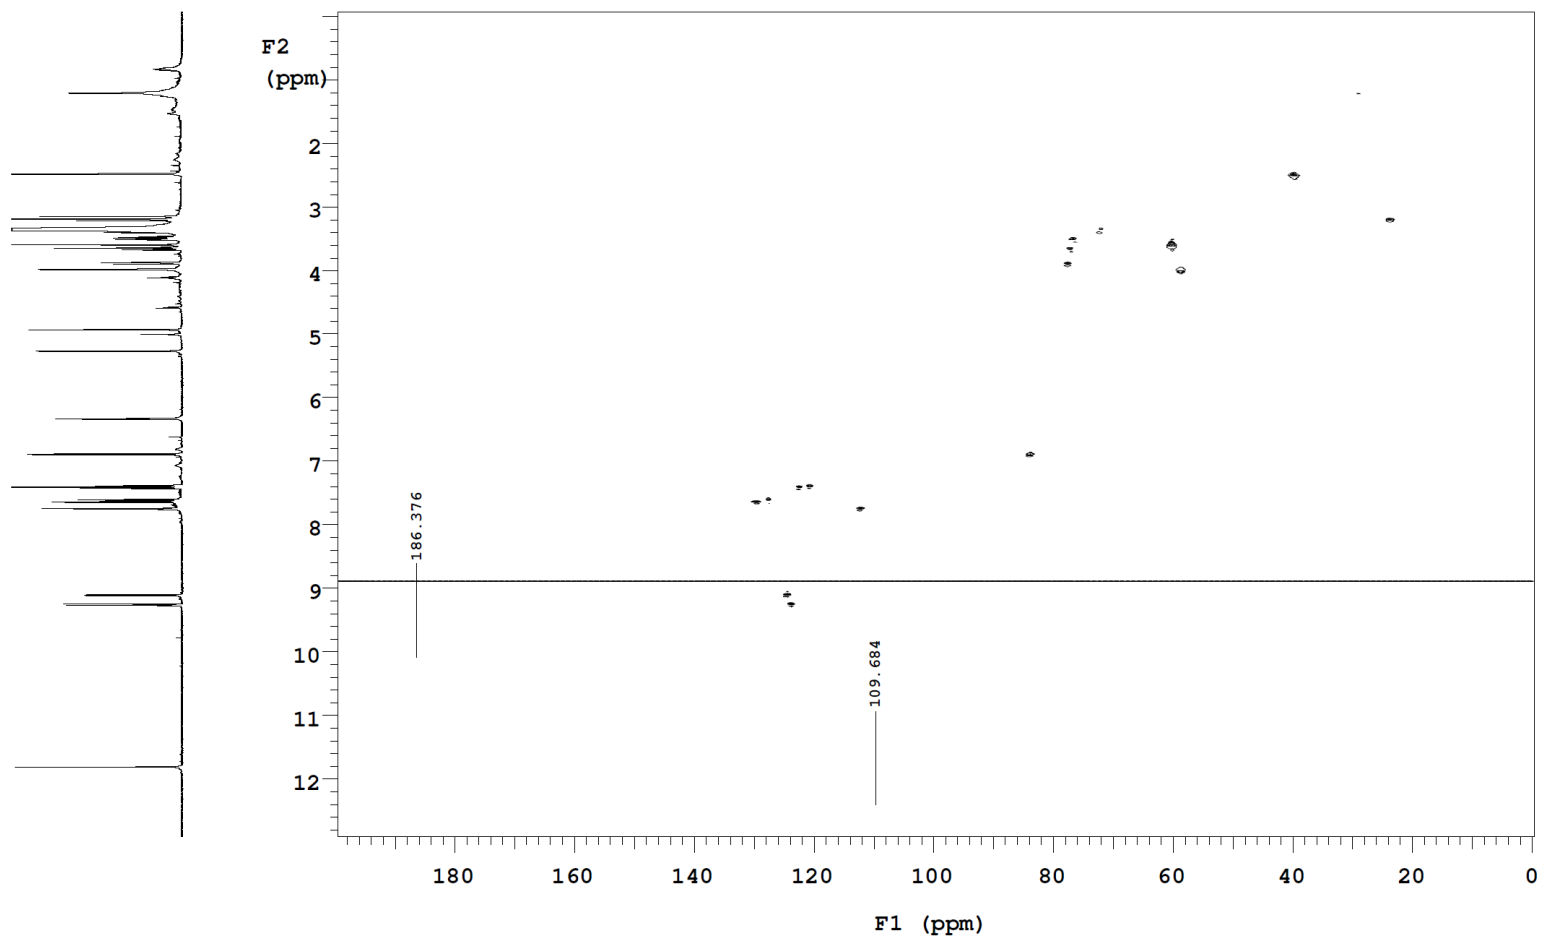

Figure S21: HSQC spectrum (DMSO-*d*<sub>6</sub>, 500 MHz) of AT2433-A4 (2)

500 MHz, DMSO-d<sub>6</sub>, 24 hrs  
Khaled A. Shaaban

Sample: khaled\_A\_Shaaban  
File: xp

Pulse Sequence: gHMBC

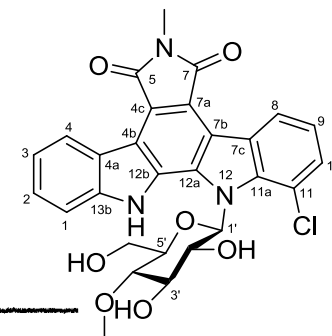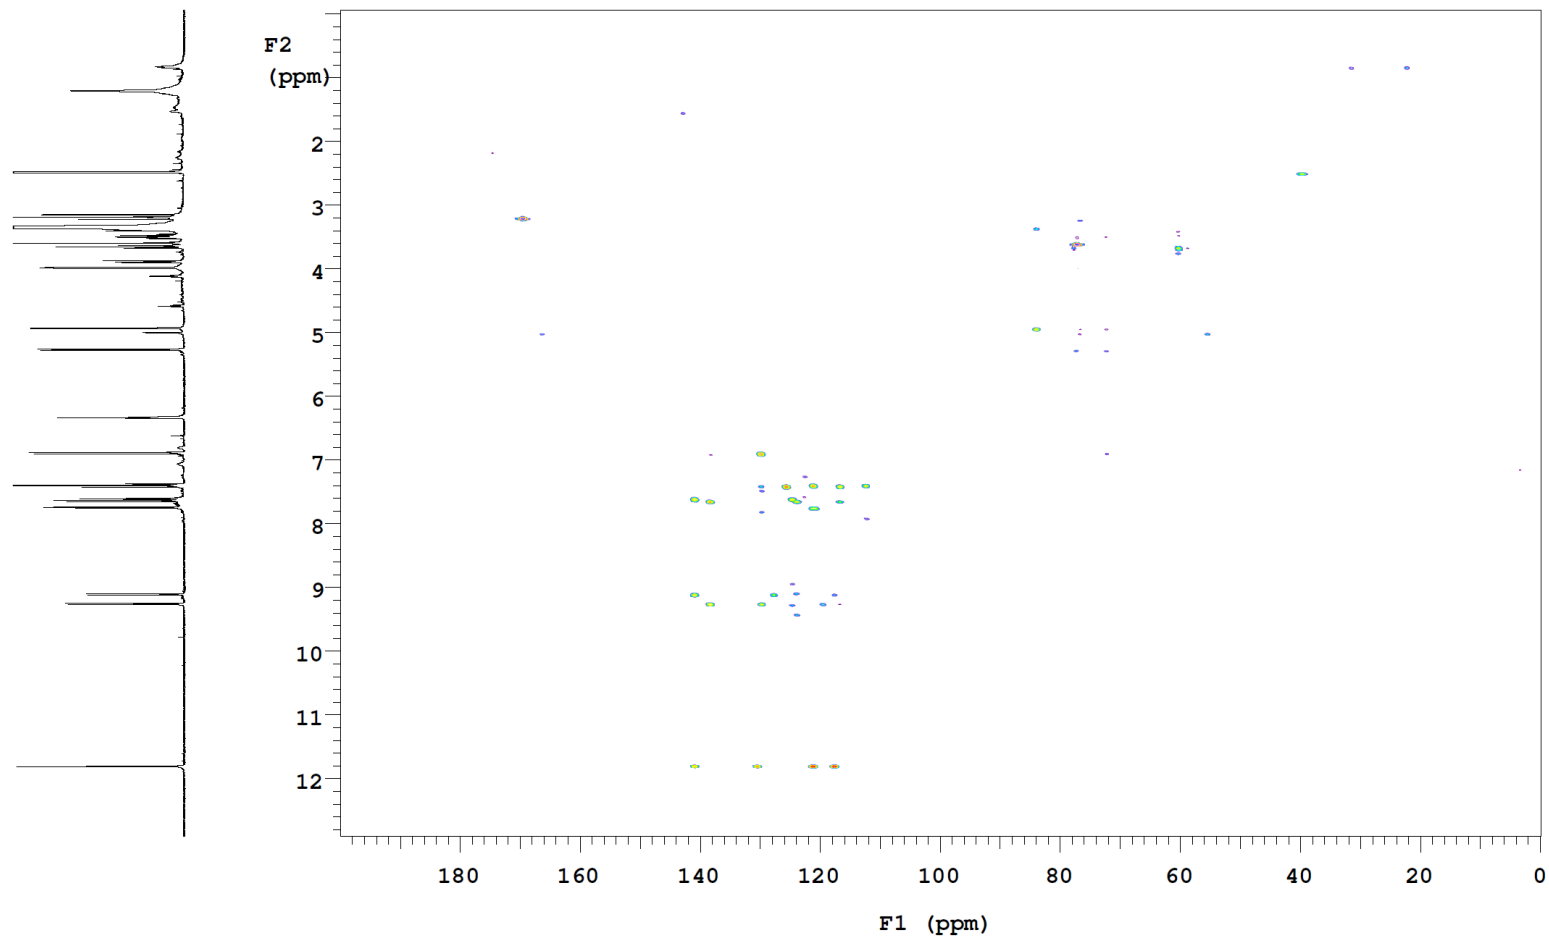

Figure S22: HMBC spectrum (DMSO-d<sub>6</sub>, 500 MHz) of AT2433-A4 (2)



500 MHz, DMSO-d<sub>6</sub>, 5 hrs  
Khaled A. Shaaban

Sample: khaled\_A\_Shaaban  
File: xp

Pulse Sequence: TOCSY

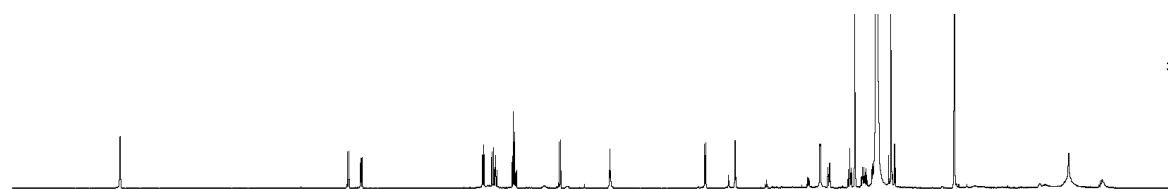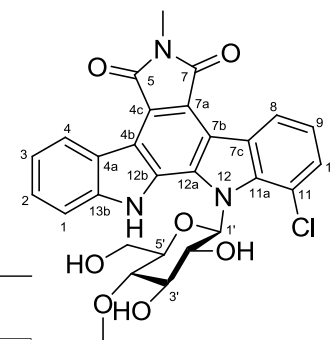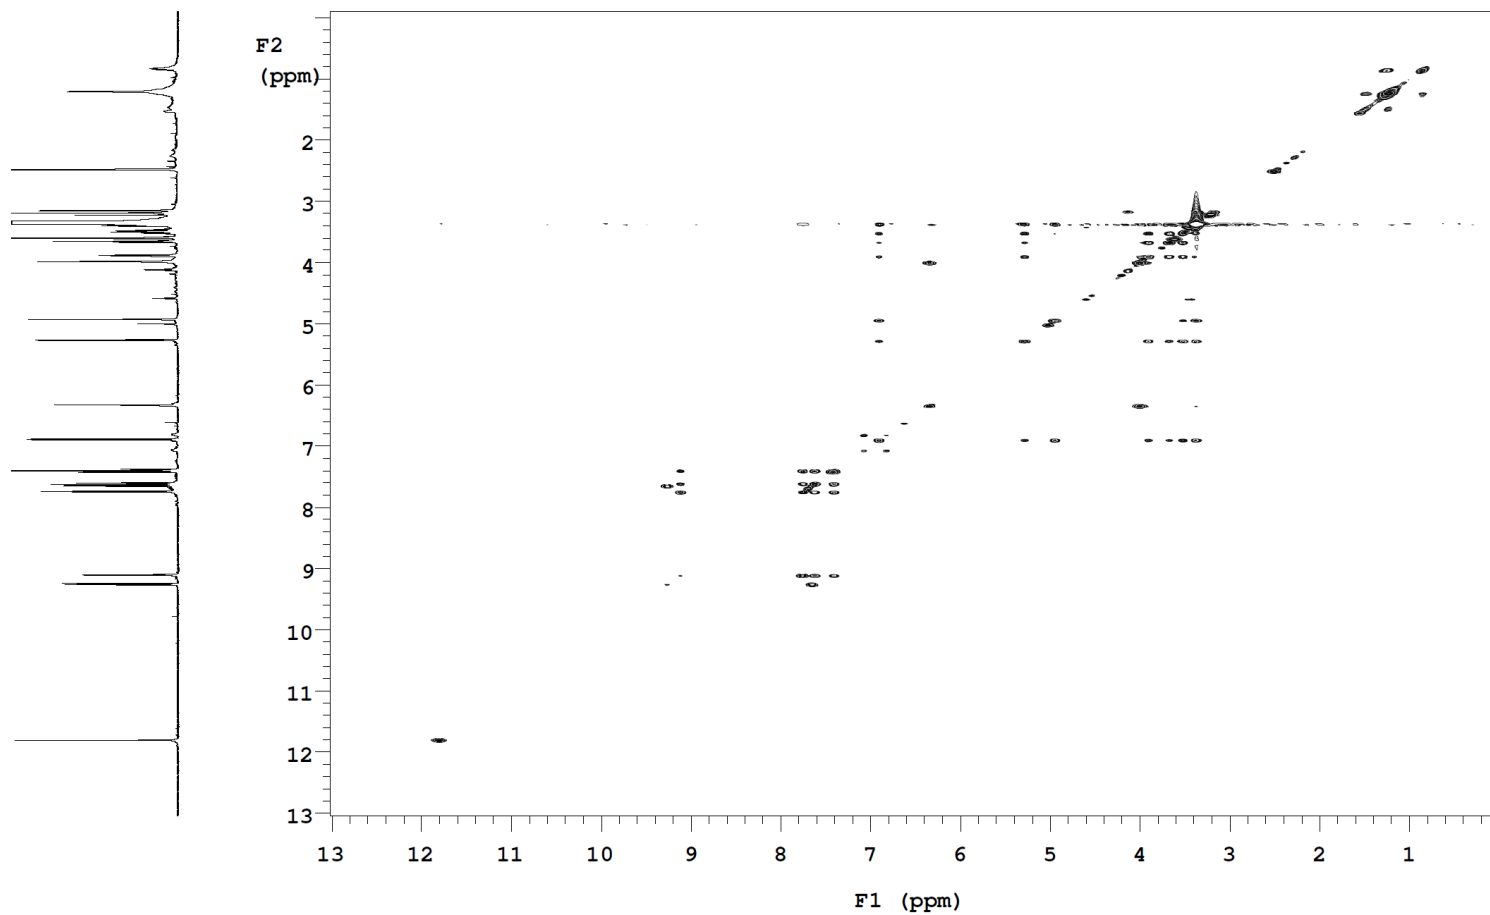

**Figure S23:** TOCSY spectrum (DMSO-*d*<sub>6</sub>, 500 MHz) of AT2433-A4 (2)

500 MHz, DMSO-d<sub>6</sub>, 15 hrs  
Khaled A. Shaaban

Sample: khaled\_A\_Shaaban  
File: xp

Pulse Sequence: NOESY

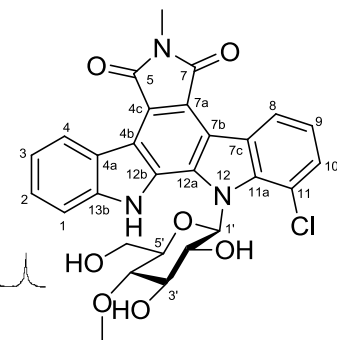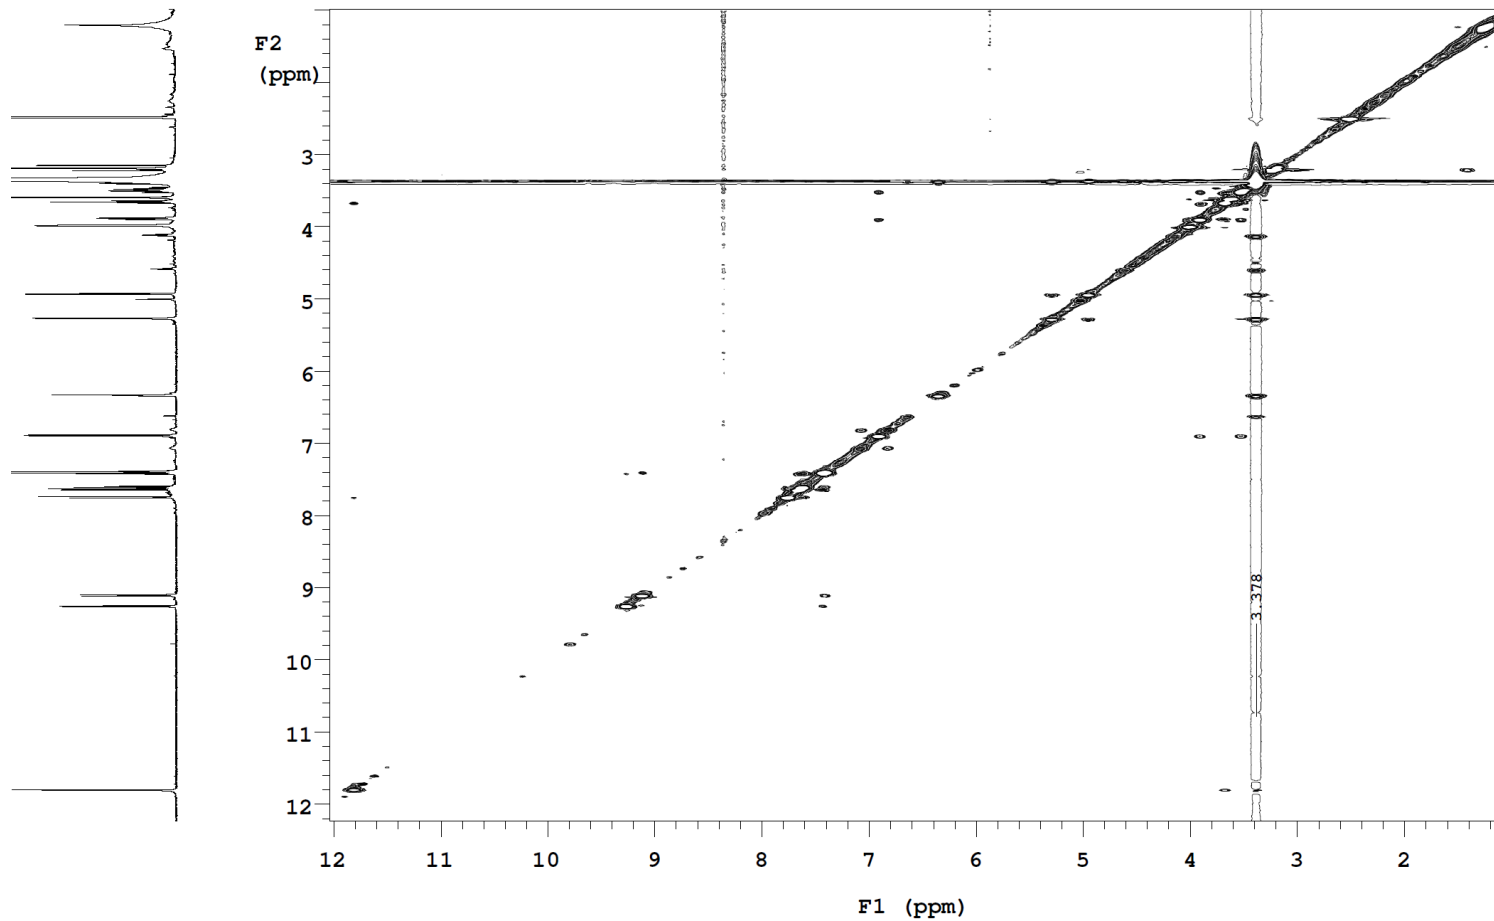

**Figure S24:** NOESY spectrum (DMSO-*d*<sub>6</sub>, 500 MHz) of AT2433-A4 (**2**)

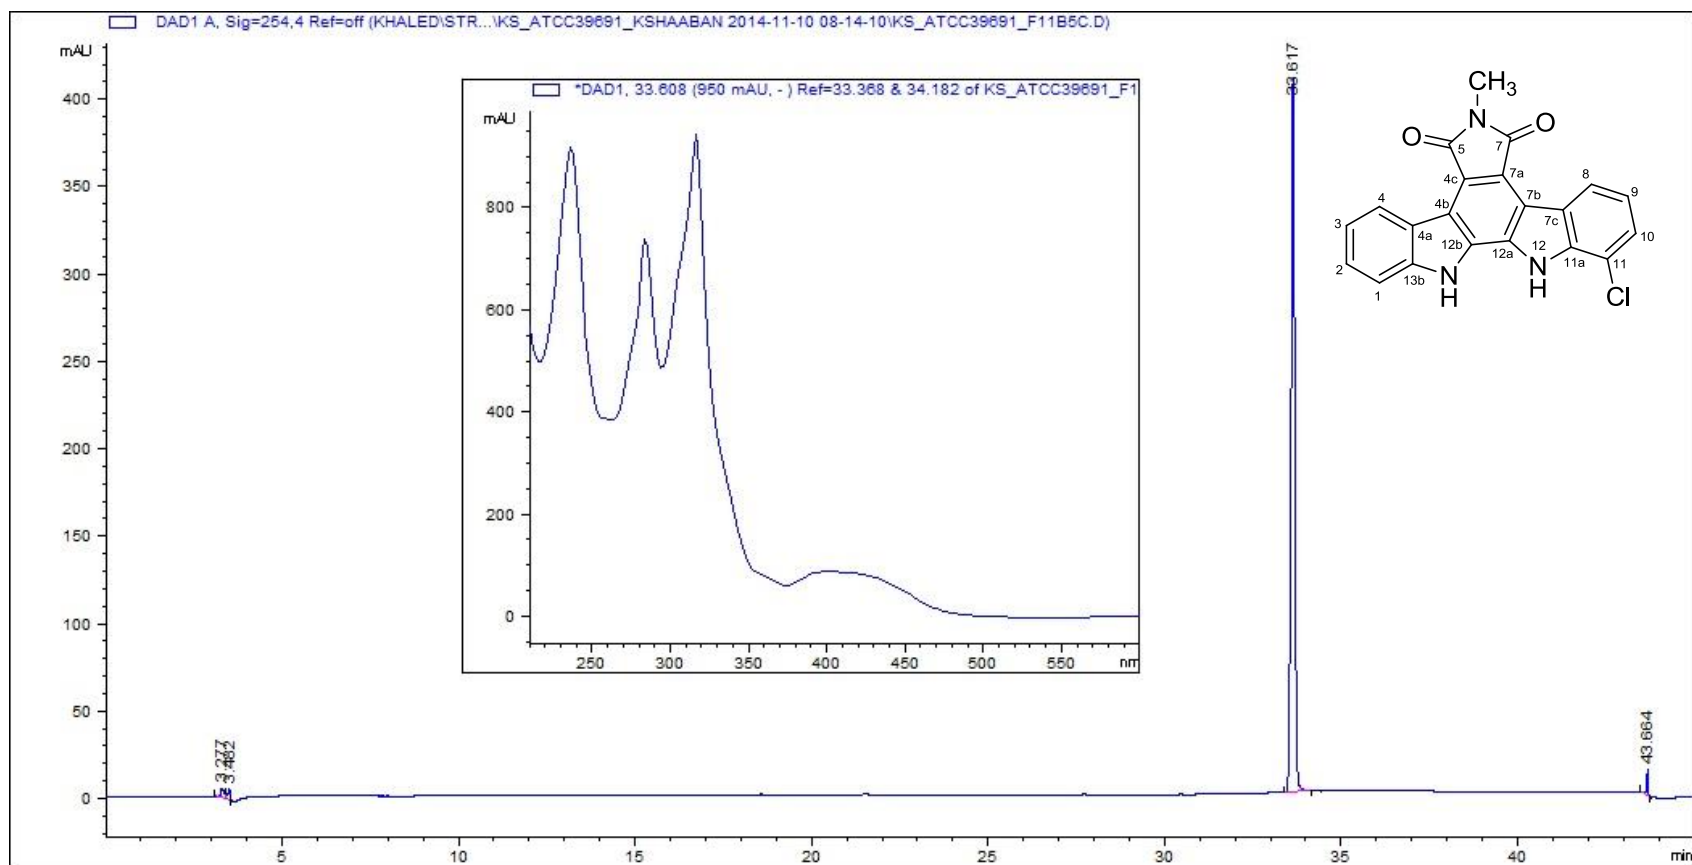

**Figure S25:** HPLC of AT2433-A5 (**3**). HPLC-conditions: Detection wavelength 254 nm; **solvent A:** H<sub>2</sub>O/0.1% TFA; **solvent B:** CH<sub>3</sub>CN; flow rate: 1.0 mL min<sup>-1</sup>; 0-35 min, 5%-100% B; 35-40 min, 100% B; 40-41 min, 100%-5% B; 41-45 min, 5% B). UV-vis inset of full wavelength 190-600 nm.

14-0567a #1-36 RT: 0.03-0.96 AV: 36 NL: 2.78E7  
T: FTMS - p ESI Full ms2 486.00@hcd12.00 [200.00-750.00]

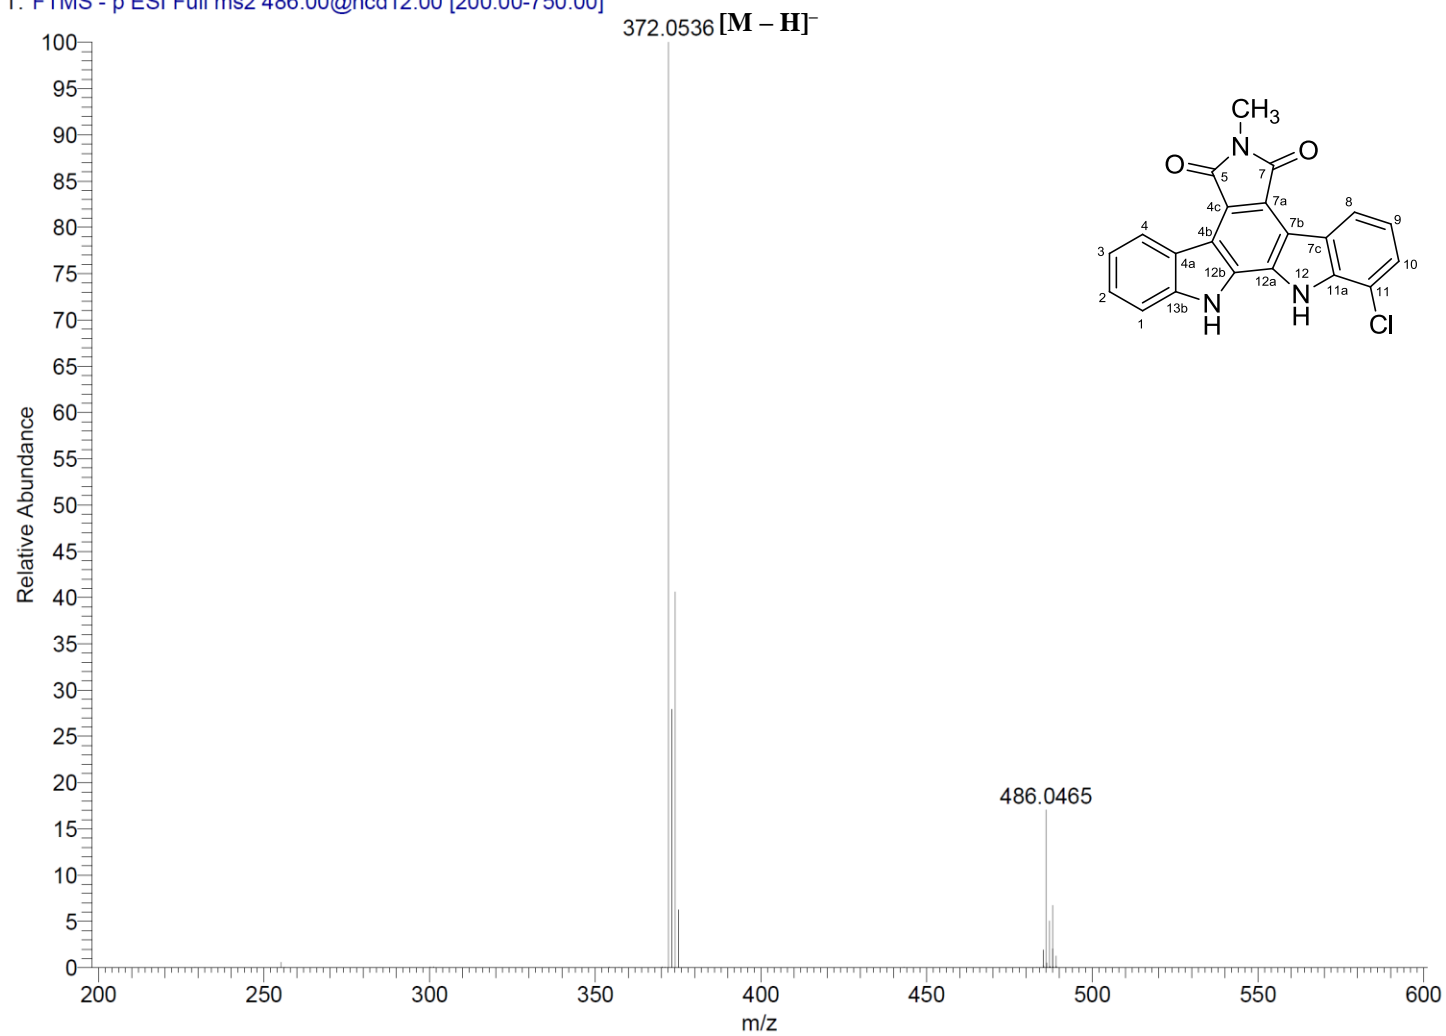

**Figure S26:** (-)-HRESI-MS spectrum of AT2433-A5 (3)

500 MHz, DMSO-d<sub>6</sub>, nt=265  
Khaled A. Shaaban

Sample: khaled\_A\_Shaaban  
File: xp

Pulse Sequence: s2pul

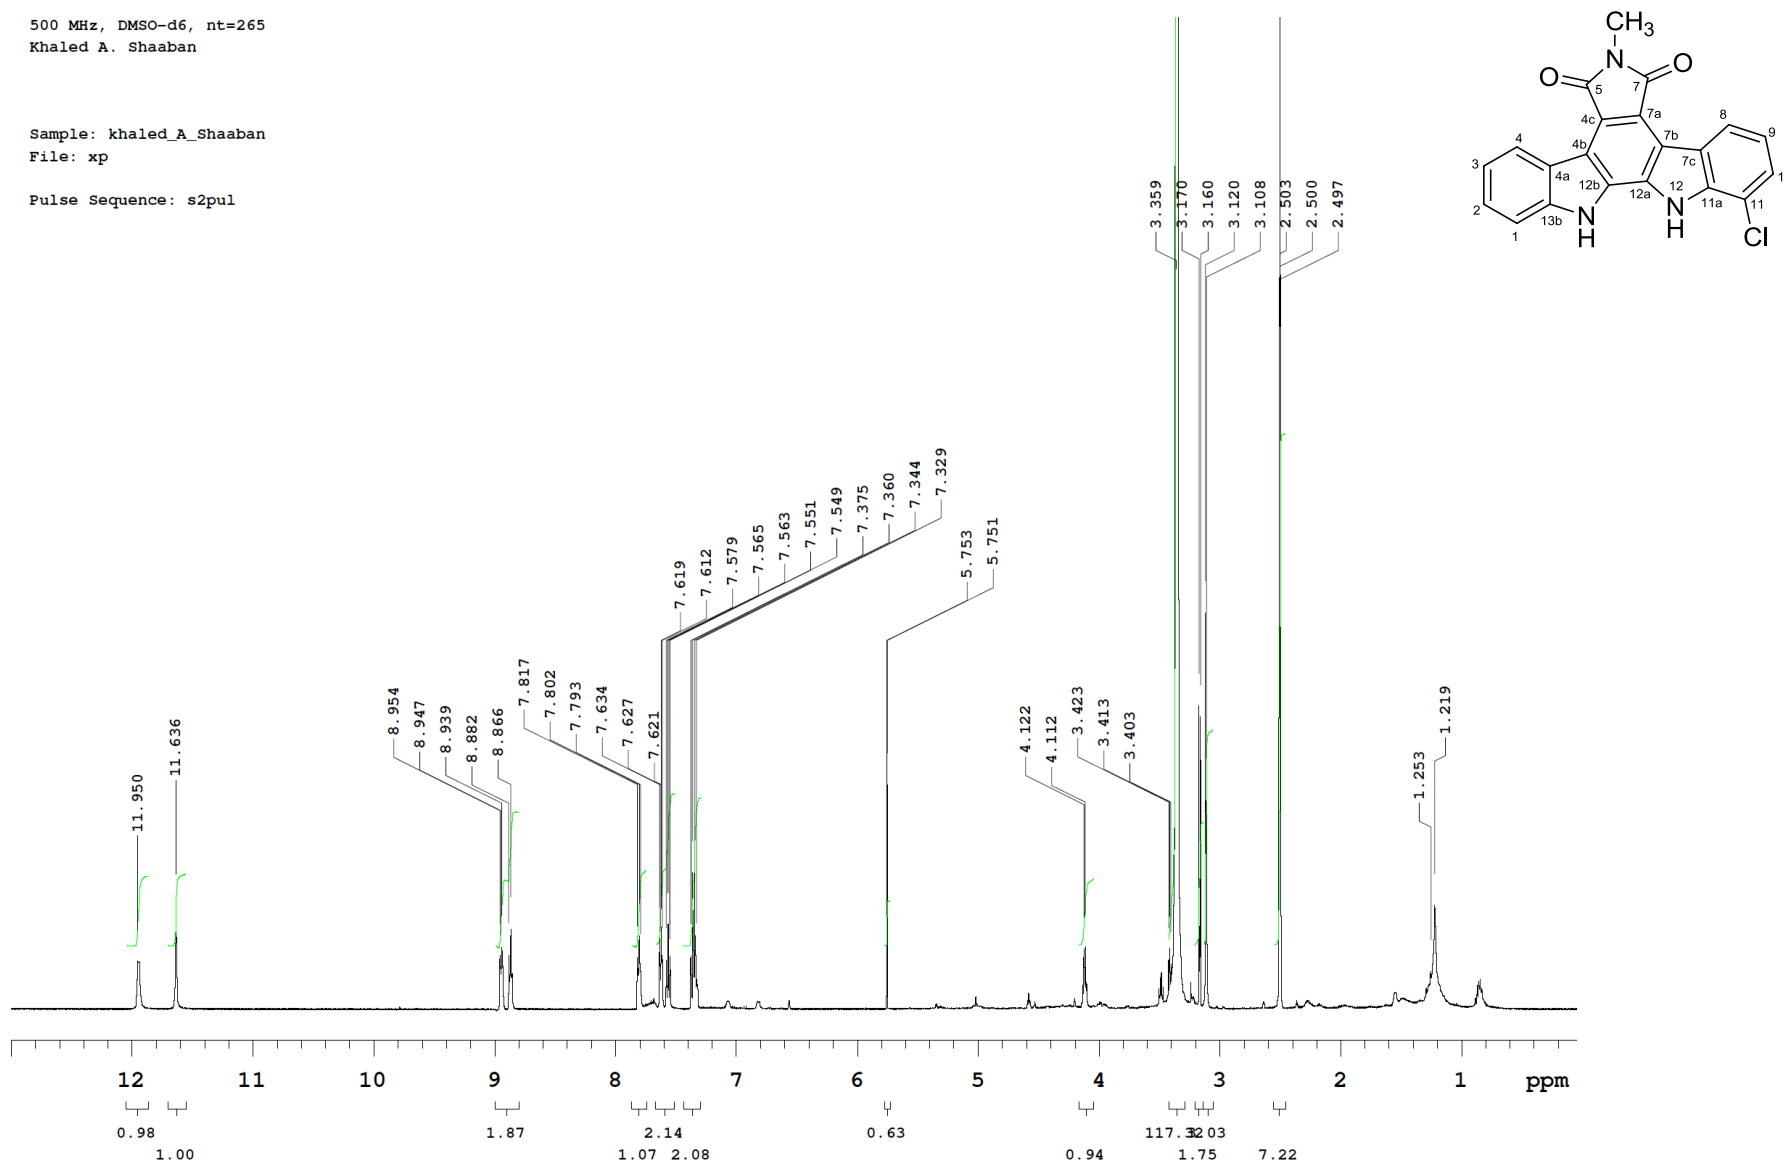

Figure S27: <sup>1</sup>H NMR spectrum (DMSO-d<sub>6</sub>, 500 MHz) of AT2433-A5 (3)

Khaled A. Shaaban, F11B5C

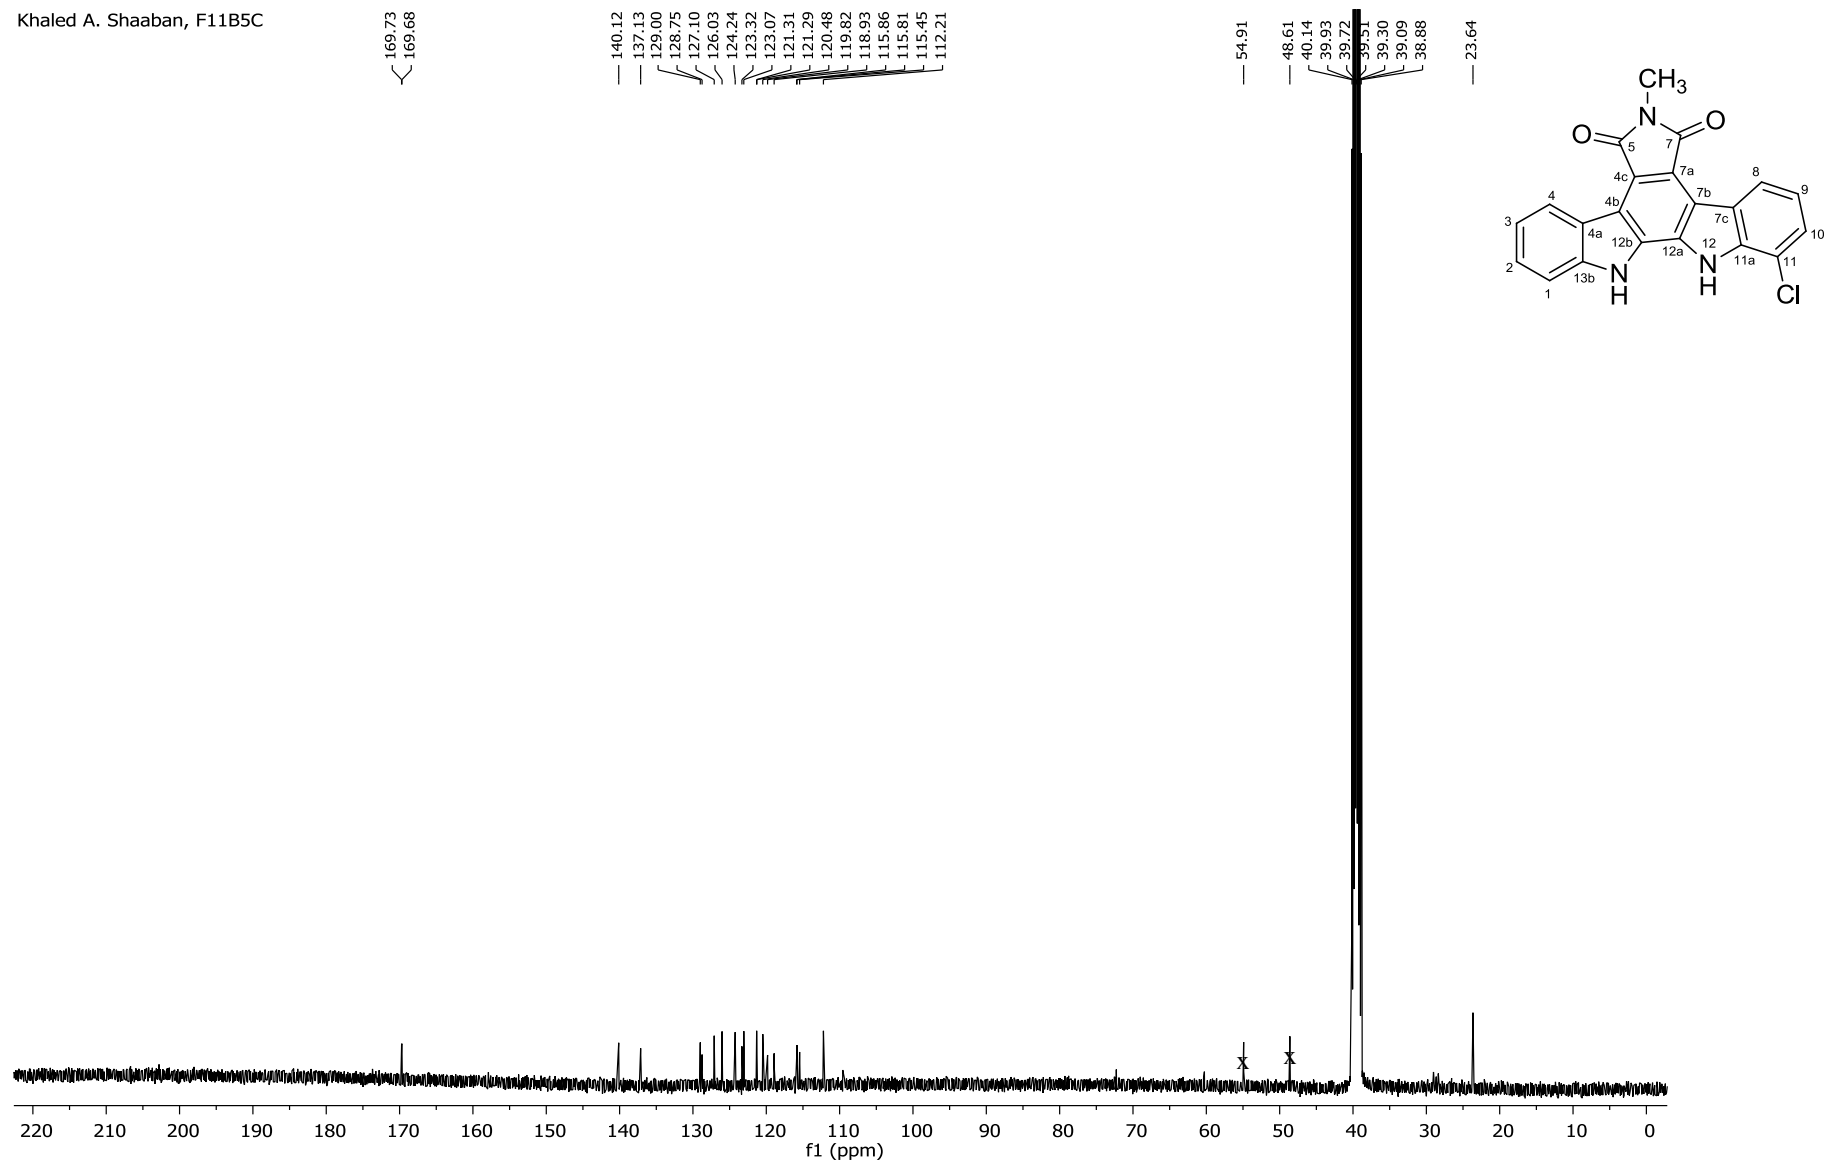

**Figure S28:** <sup>13</sup>C NMR spectrum (DMSO-*d*<sub>6</sub>, 100 MHz) of AT2433-A5 (**3**)

500 MHz, DMSO-d6, 2 hrs  
Khaled A. Shaaban

Sample: khaled\_A\_Shaaban  
File: xp

Pulse Sequence: gCOSY

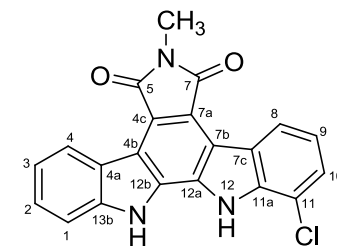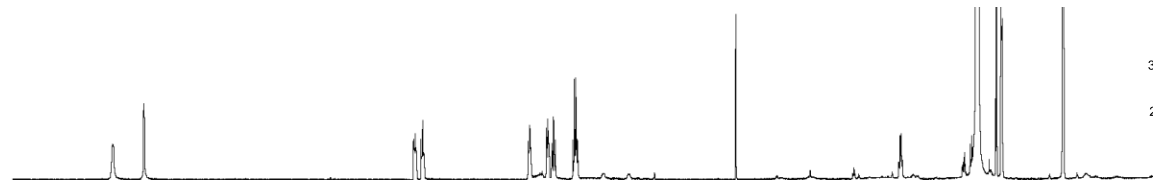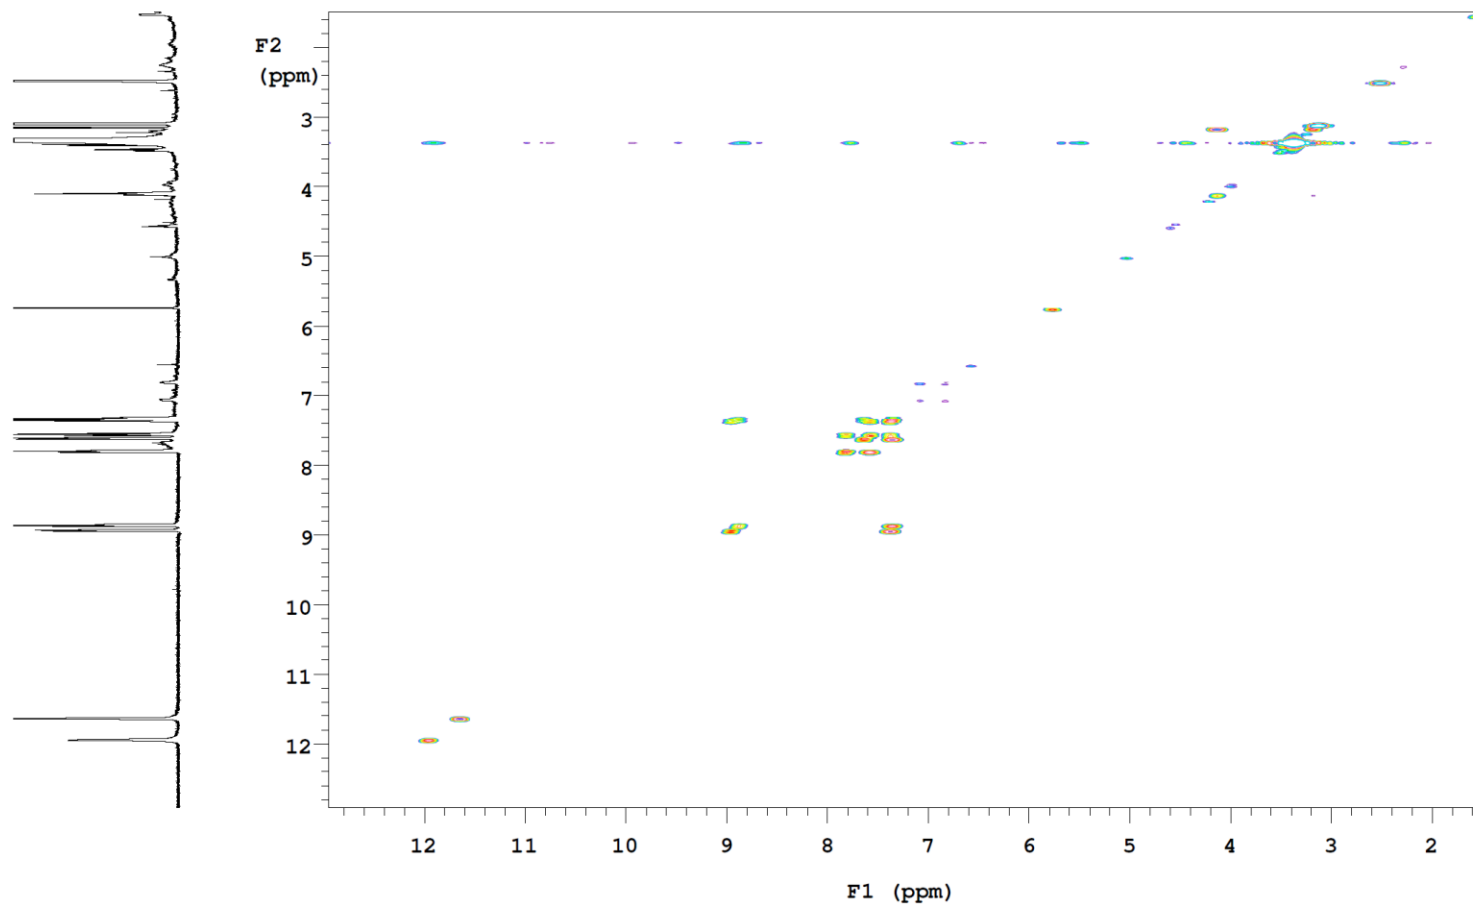

**Figure S29:** <sup>1</sup>H-<sup>1</sup>H COSY spectrum (CD<sub>3</sub>OD, 500 MHz) of AT2433-A5 (**3**)

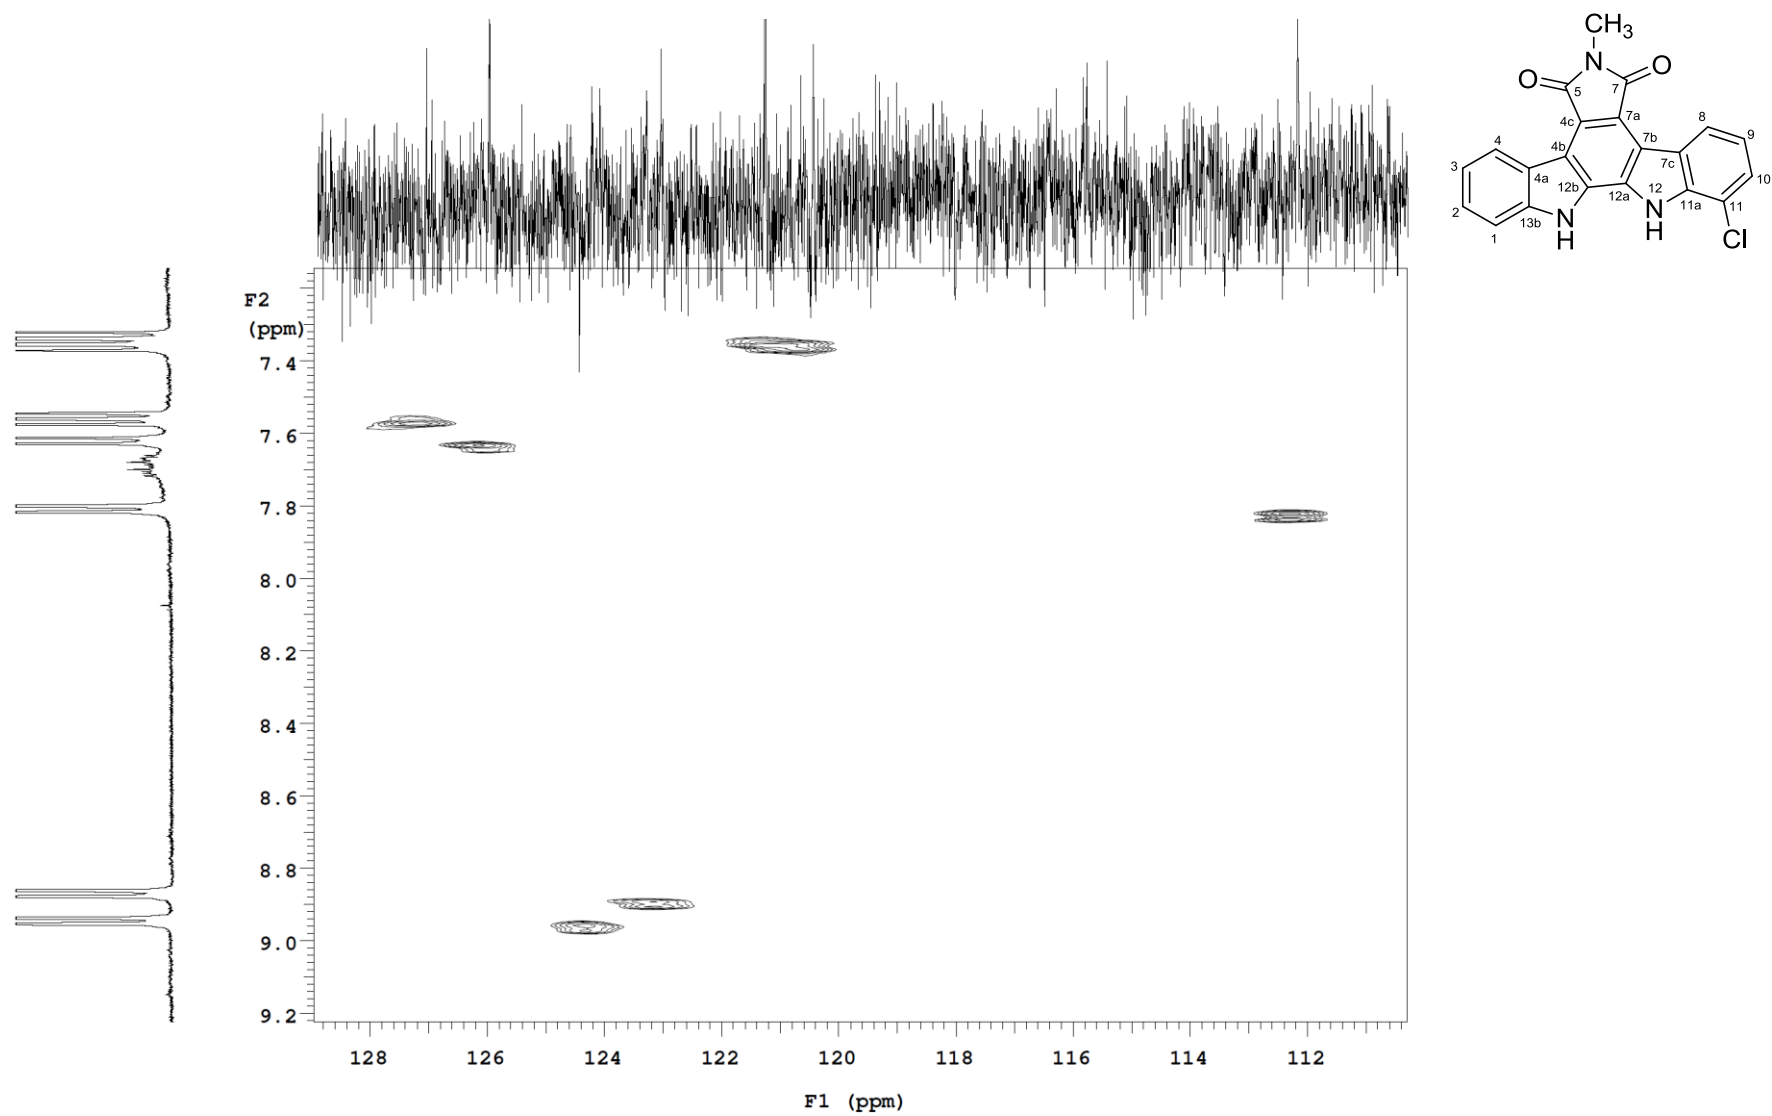

**Figure S30:** Enlarged HSQC spectrum (DMSO-*d*<sub>6</sub>, 500 MHz) of AT2433-A5 (**3**)



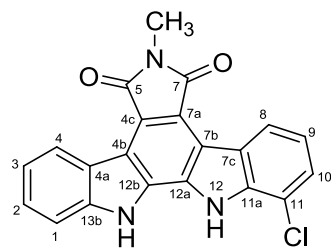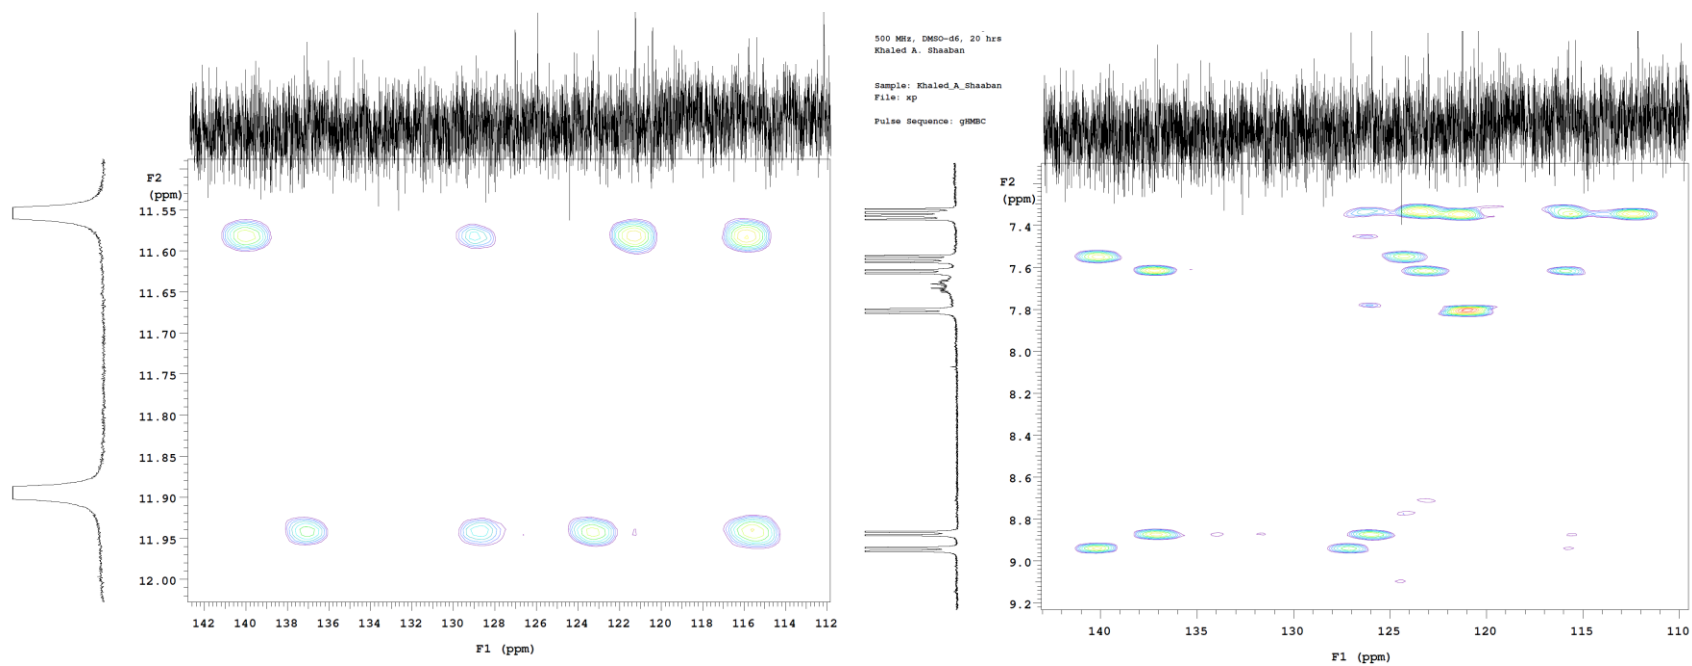

**Figure S31:** Enlarged HMBC spectrum (DMSO-*d*<sub>6</sub>, 500 MHz) of AT2433-A5 (3)

500 MHz, DMSO-d<sub>6</sub>, 3 hrs  
Khaled A. Shaaban

Sample: Khaled\_A\_Shaaban  
File: xp

Pulse Sequence: TOCSY

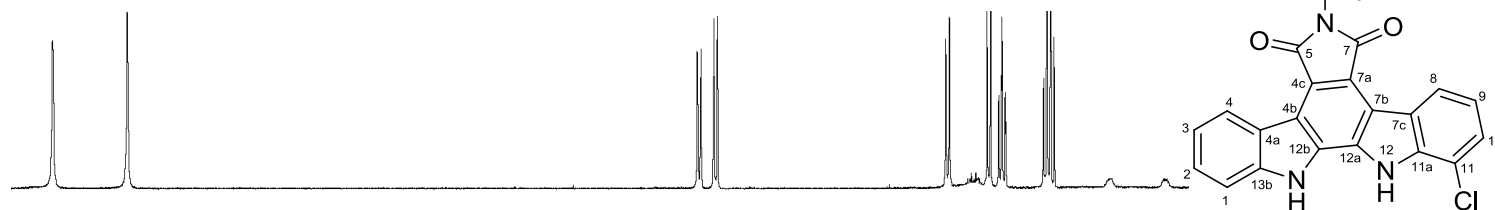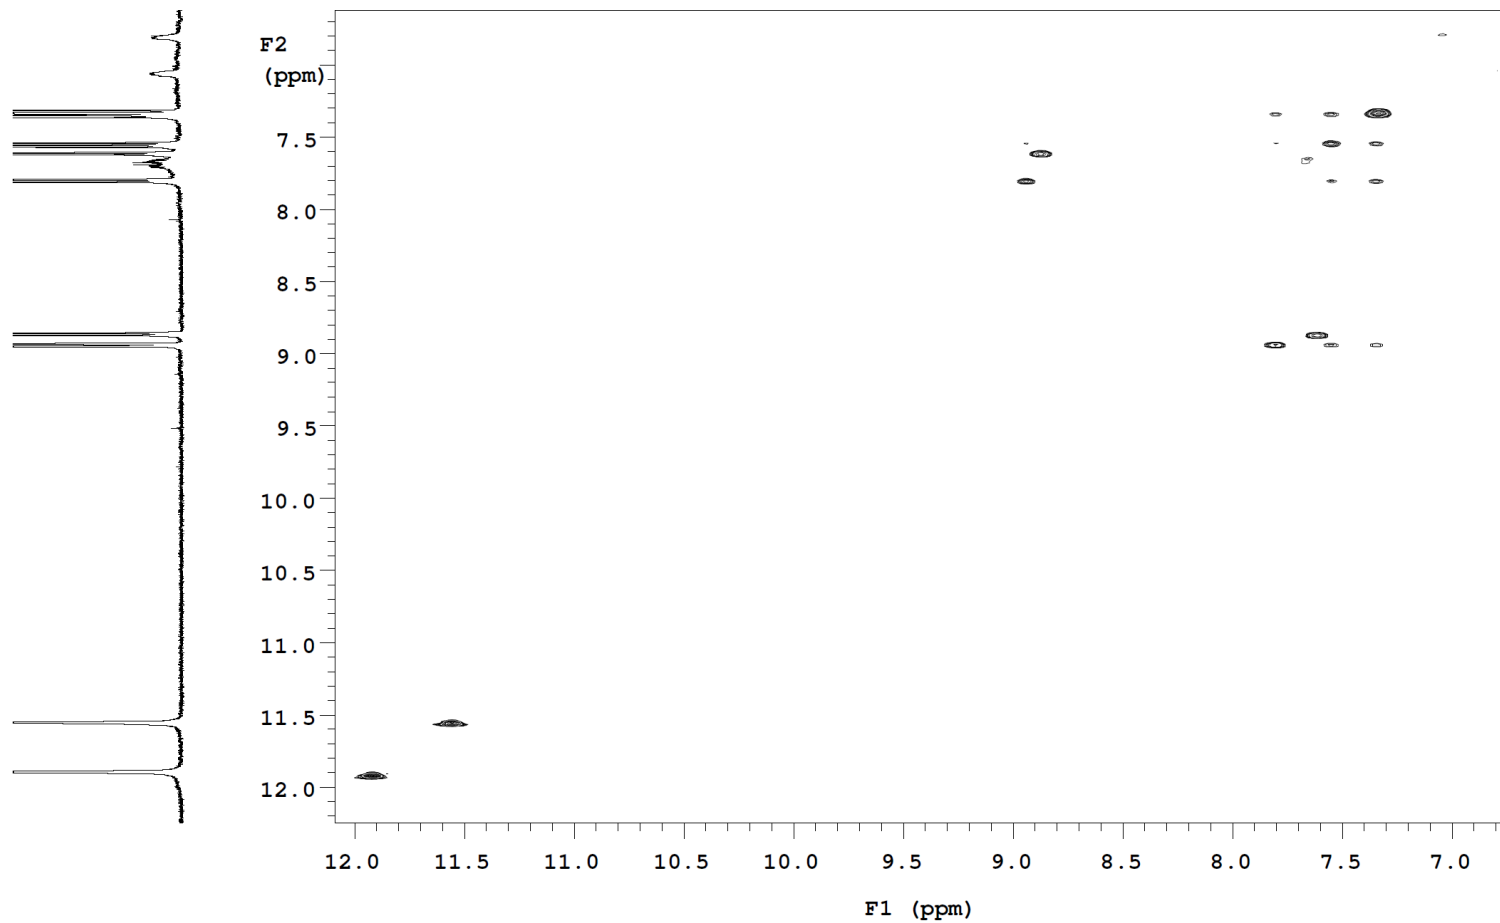

**Figure S32:** Enlarged TOCSY spectrum (DMSO-*d*<sub>6</sub>, 500 MHz) of AT2433-A5 (**3**)

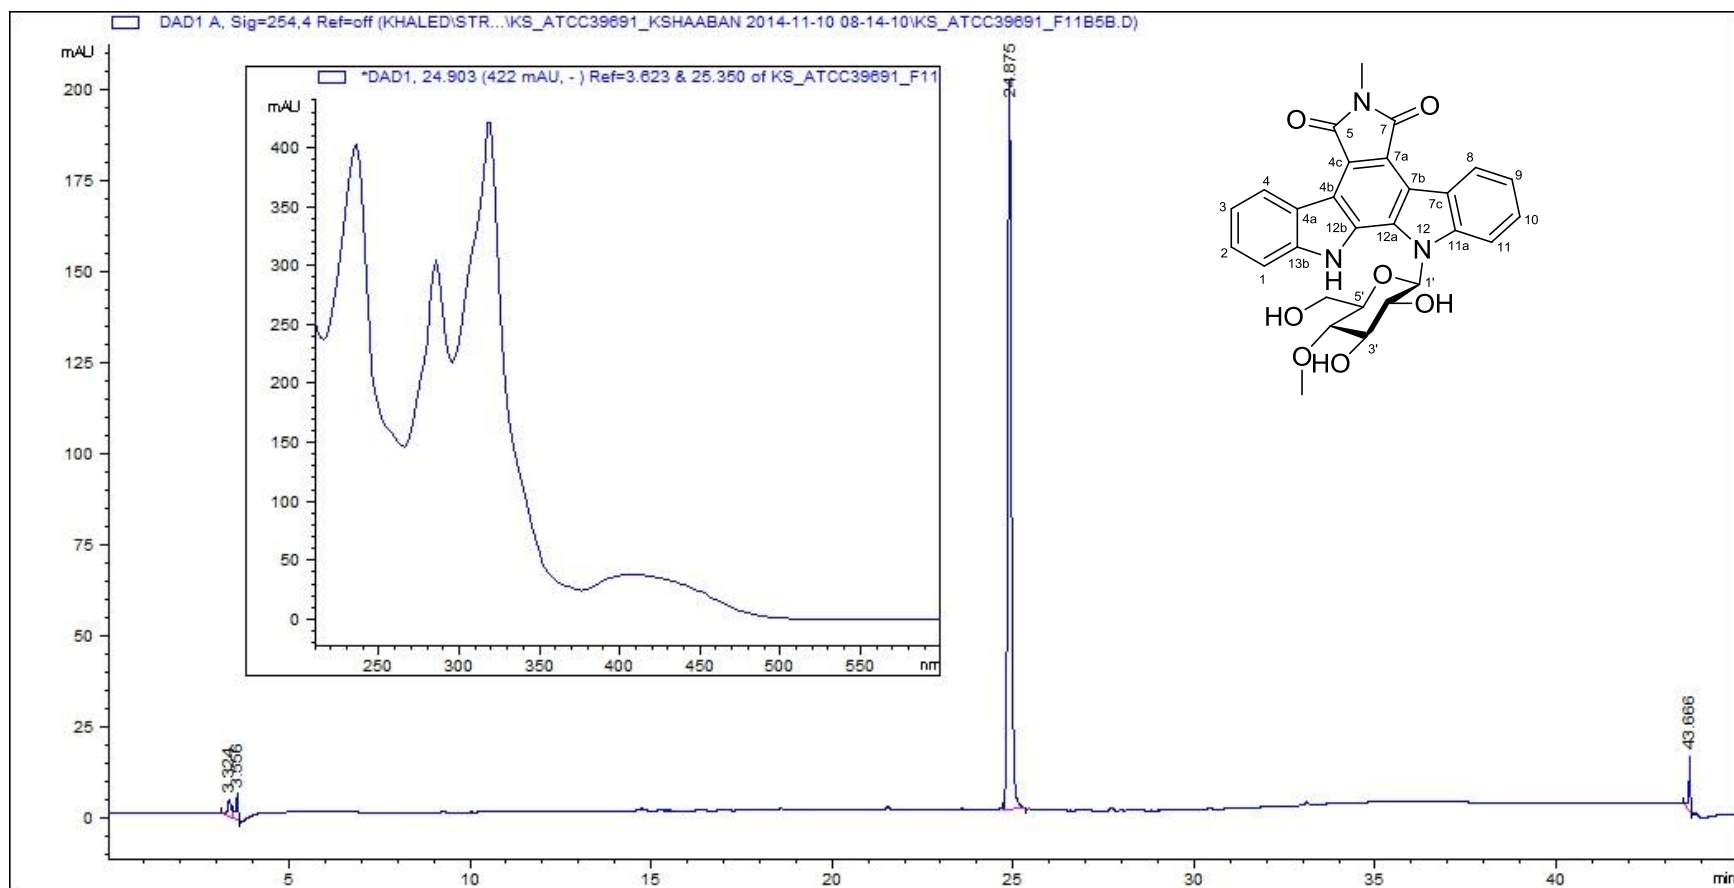

**Figure S33:** HPLC of AT2433-B3 (**4**). HPLC-conditions: Detection wavelength 254 nm; **solvent A:** H<sub>2</sub>O/0.1% TFA; **solvent B:** CH<sub>3</sub>CN; flow rate: 1.0 mL min<sup>-1</sup>; 0-35 min, 5%-100% B; 35-40 min, 100% B; 40-41 min, 100%-5% B; 41-45 min, 5% B). UV-vis inset of full wavelength 190-600 nm.

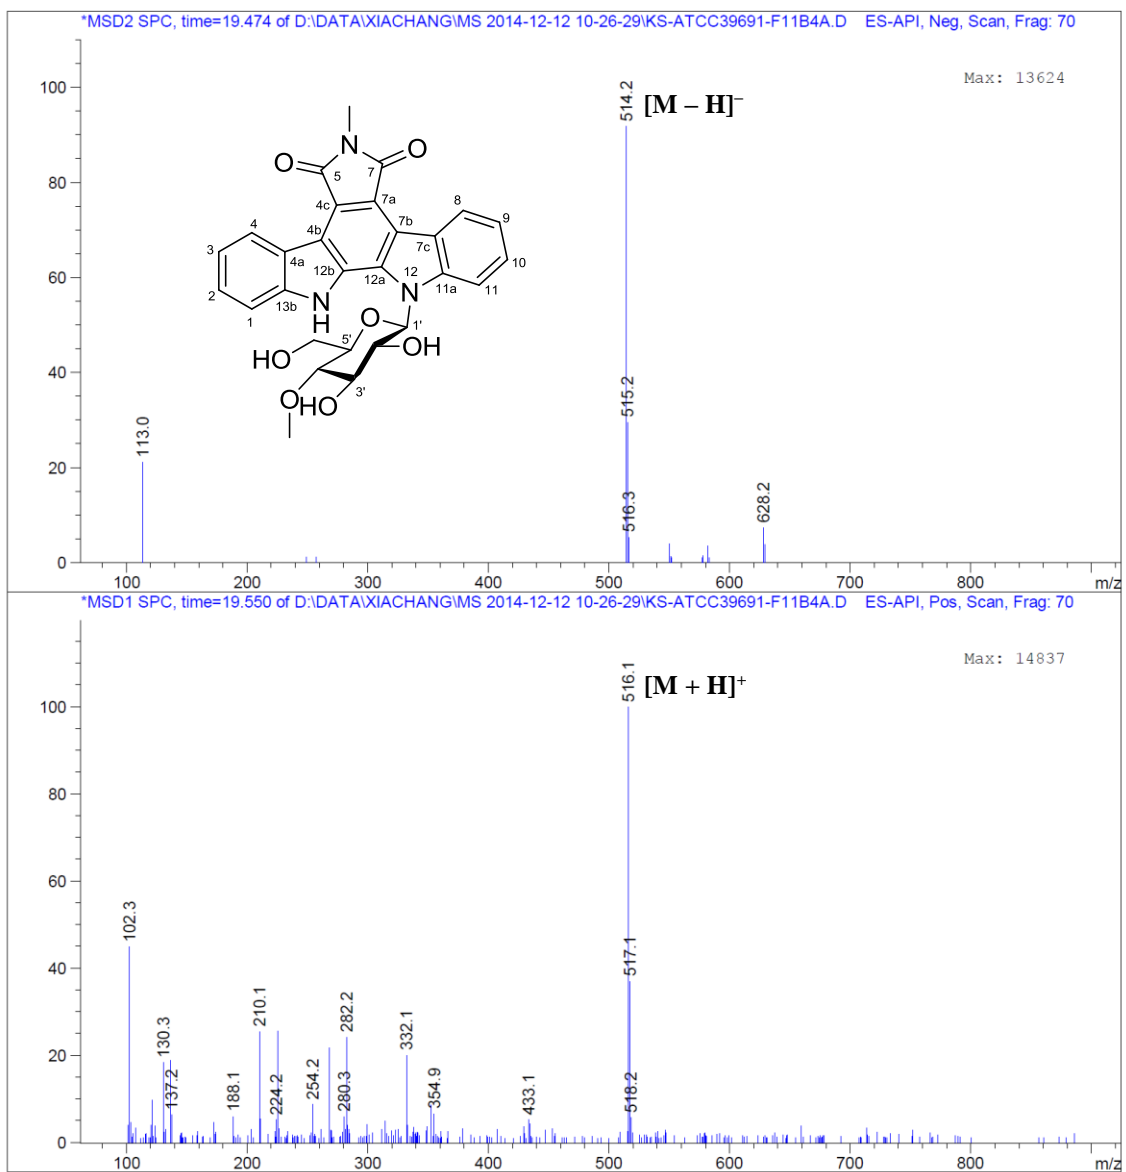

**Figure S34:** (+) and (-)-APCI-MS spectra of AT2433-B3 (4)

14-0554 #4-32 RT: 0.10-0.84 AV: 29 NL: 9.89E5  
T: FTMS - p ESI Full ms [300.00-1000.00]

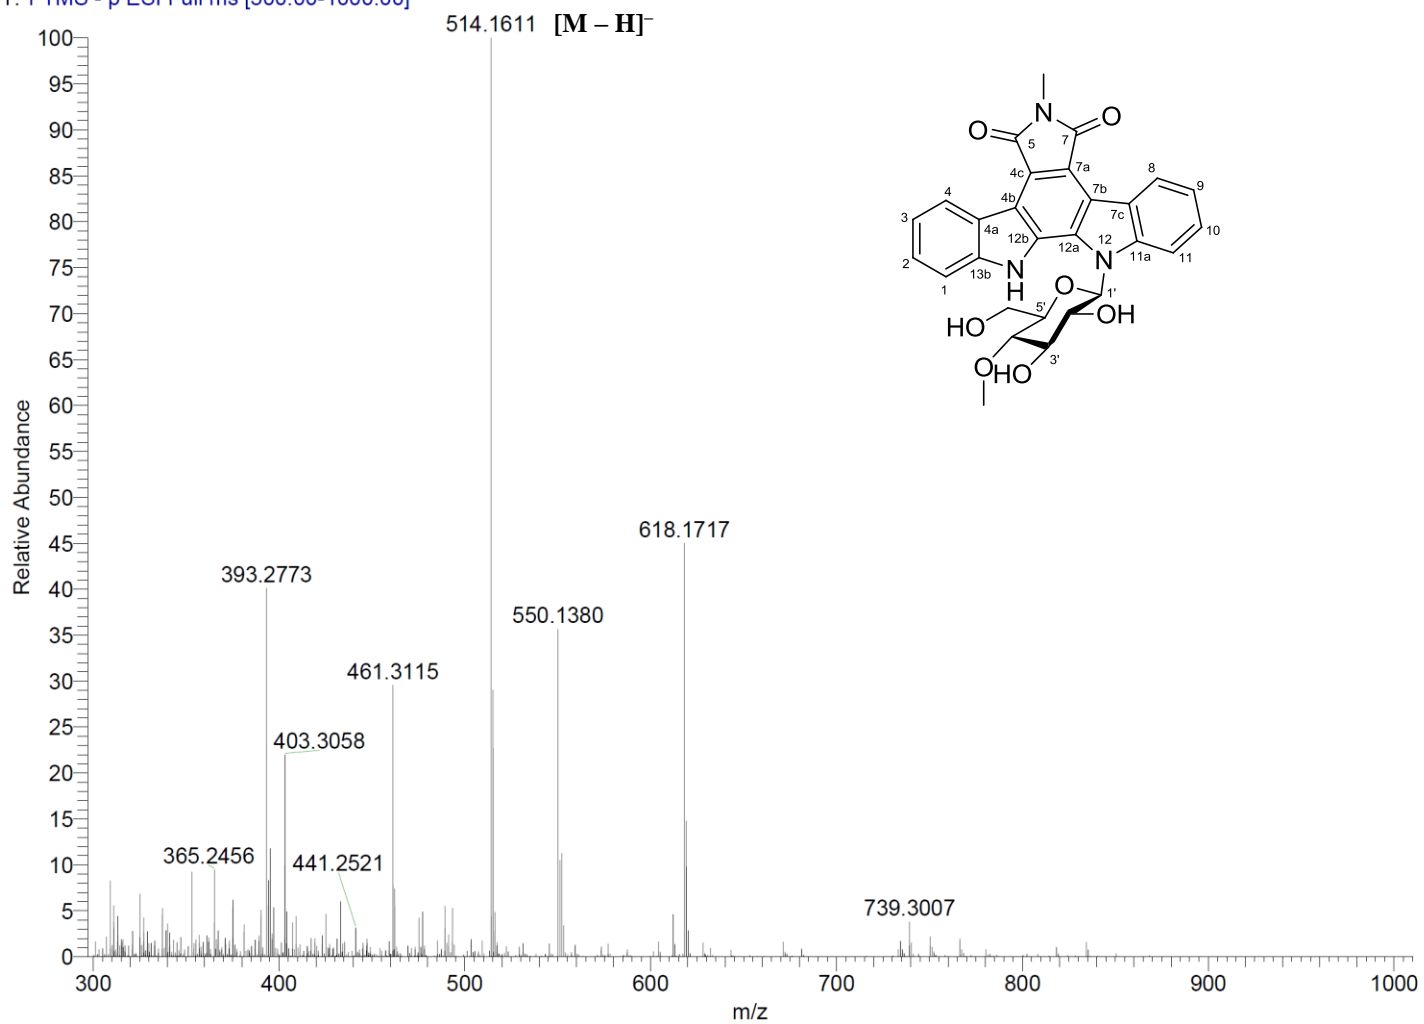

**Figure S35:** (-)-HRESI-MS spectrum of AT2433-B3 (4)

14-0554 #93-109 RT: 2.44-2.86 AV: 17 NL: 4.64E5  
T: FTMS + p ESI Full lock ms [350.00-650.00]

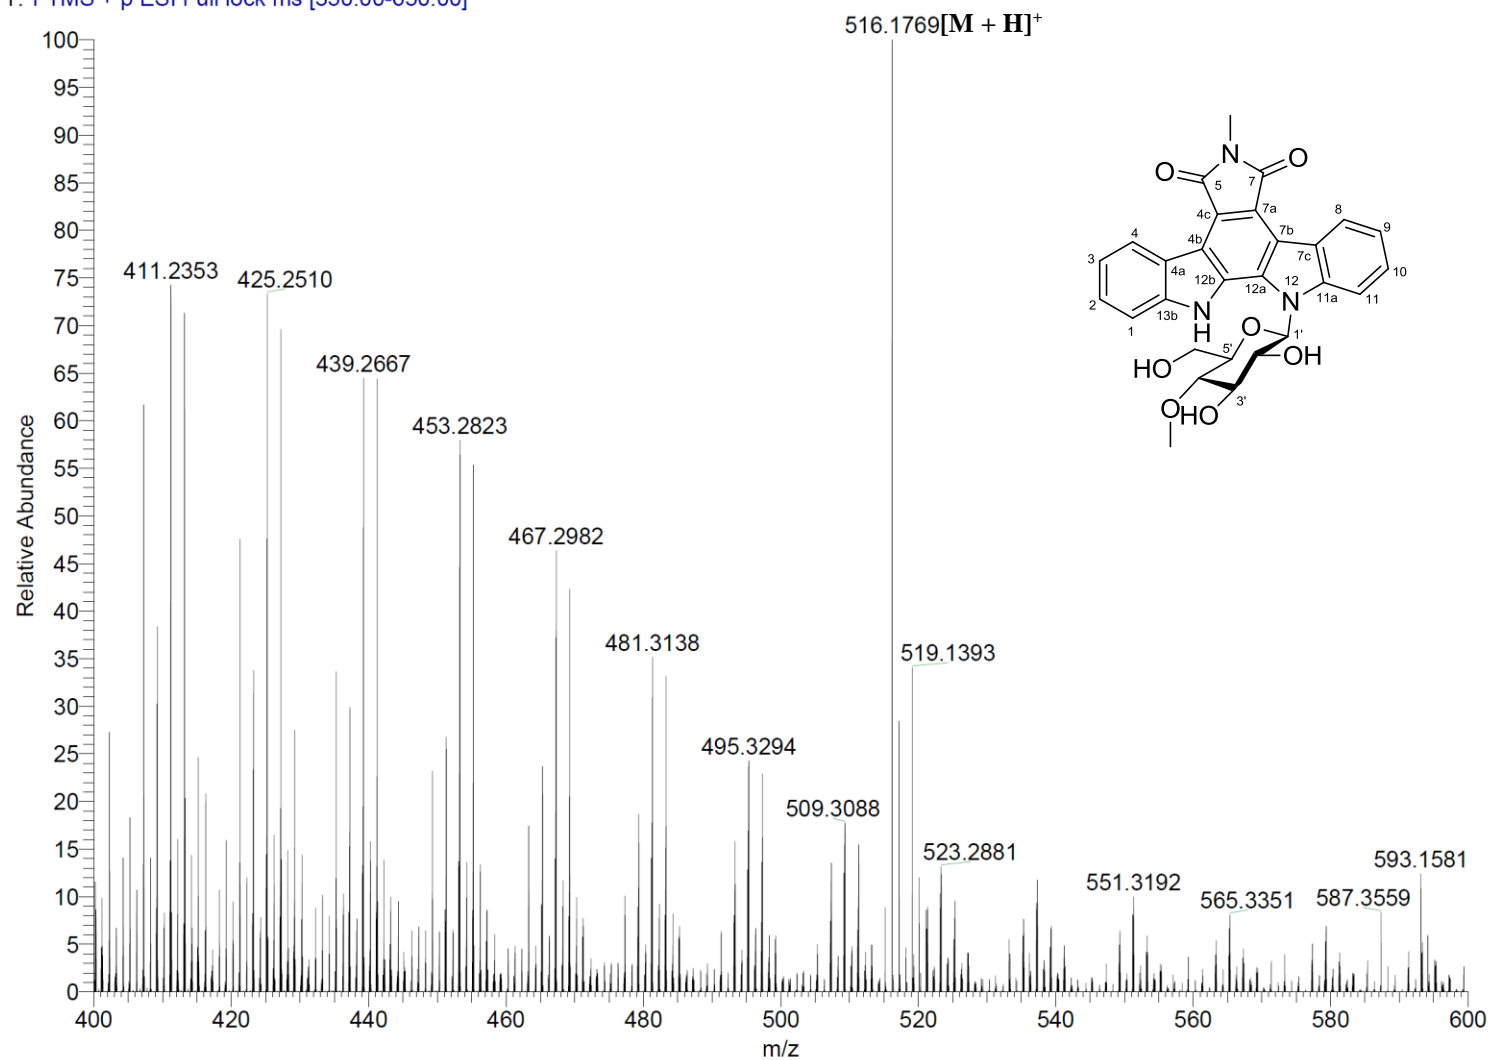

**Figure S36:** (+)-HRESI-MS spectrum of AT2433-B3 (4)

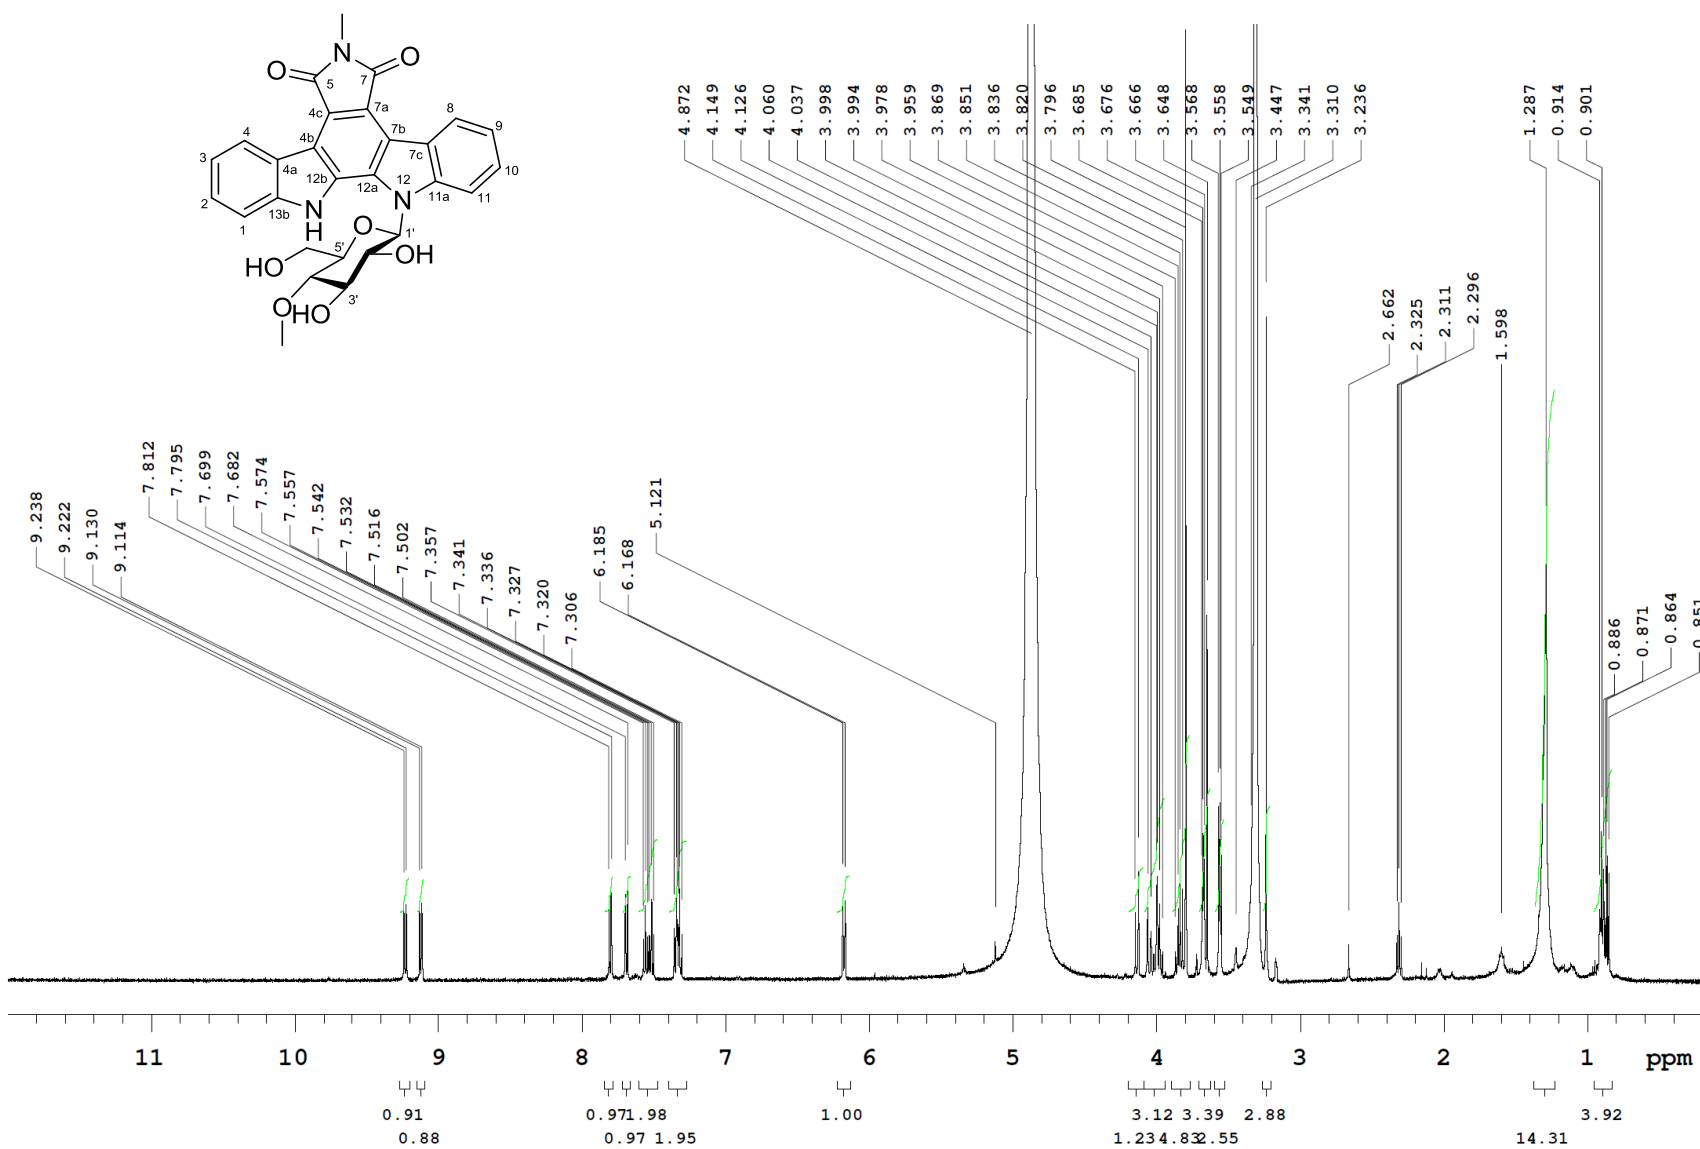

Figure S37: <sup>1</sup>H NMR spectrum (CD<sub>3</sub>OD, 500 MHz) of AT2433-B3 (4)

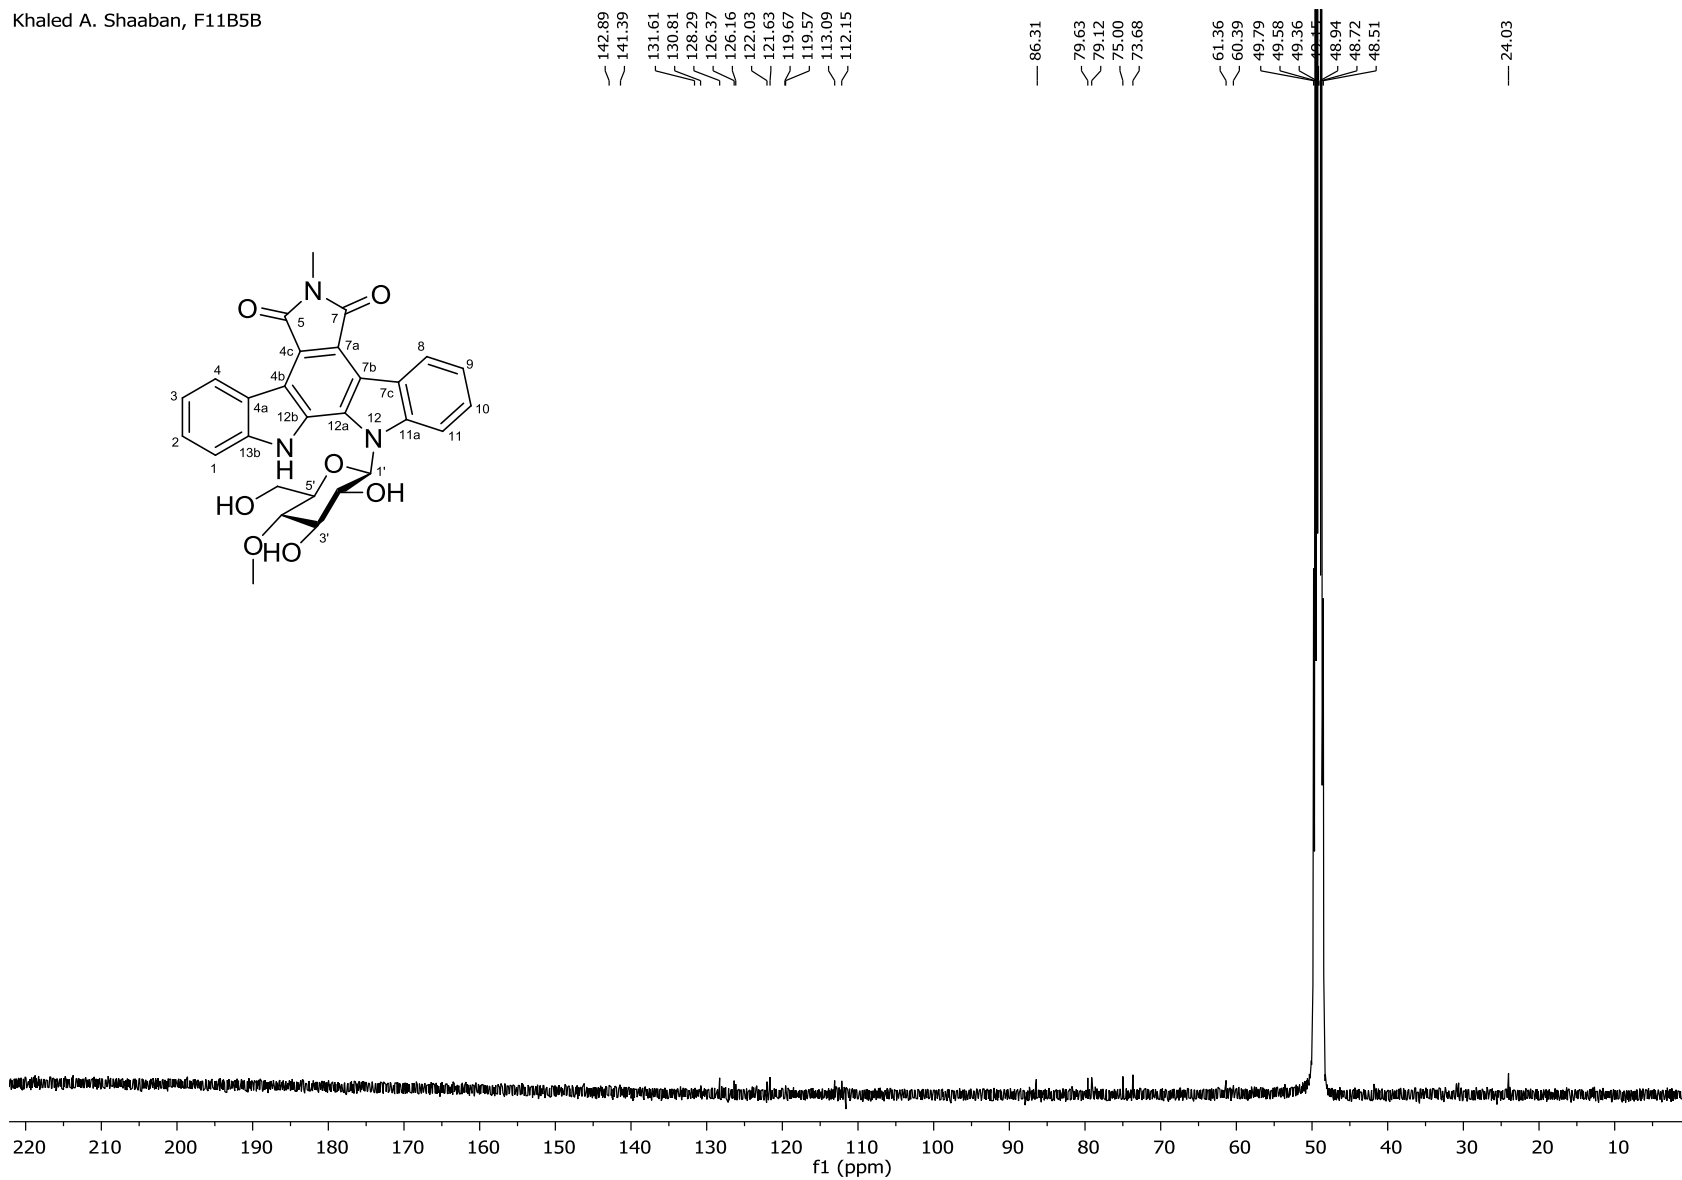

Figure S38: <sup>13</sup>C NMR spectrum (CD<sub>3</sub>OD, 100 MHz) of AT2433-B3 (4)



500 MHz, CD3OD, 80 min  
Khaled A. Shaaban

Sample: Khaled\_A\_Shaaban  
File: xp

Pulse Sequence: gCOSY

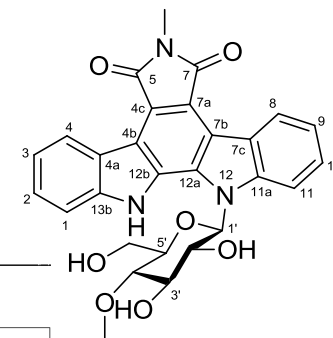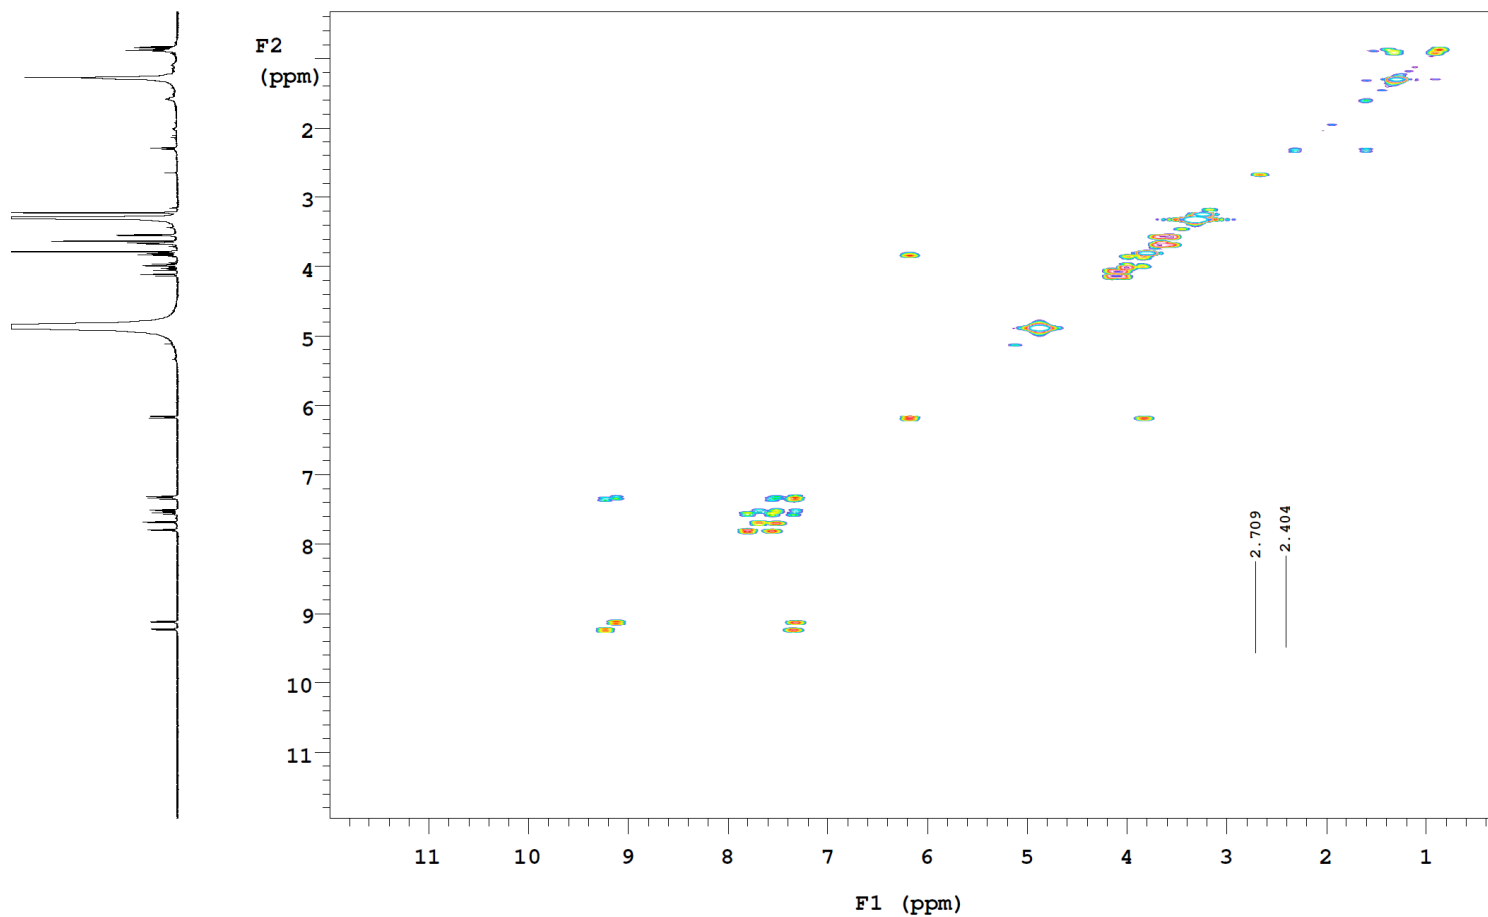

**Figure S39:**  $^1\text{H}$ - $^1\text{H}$  COSY spectrum ( $\text{CD}_3\text{OD}$ , 500 MHz) of AT2433-B3 (**4**)

500 MHz, CD<sub>3</sub>OD, 5 hrs  
Khaled A. Shaaban

Sample: Khaled\_A\_Shaaban  
File: xp

Pulse Sequence: gHSQC

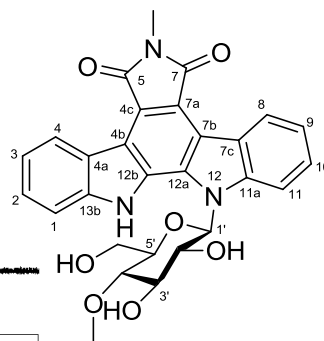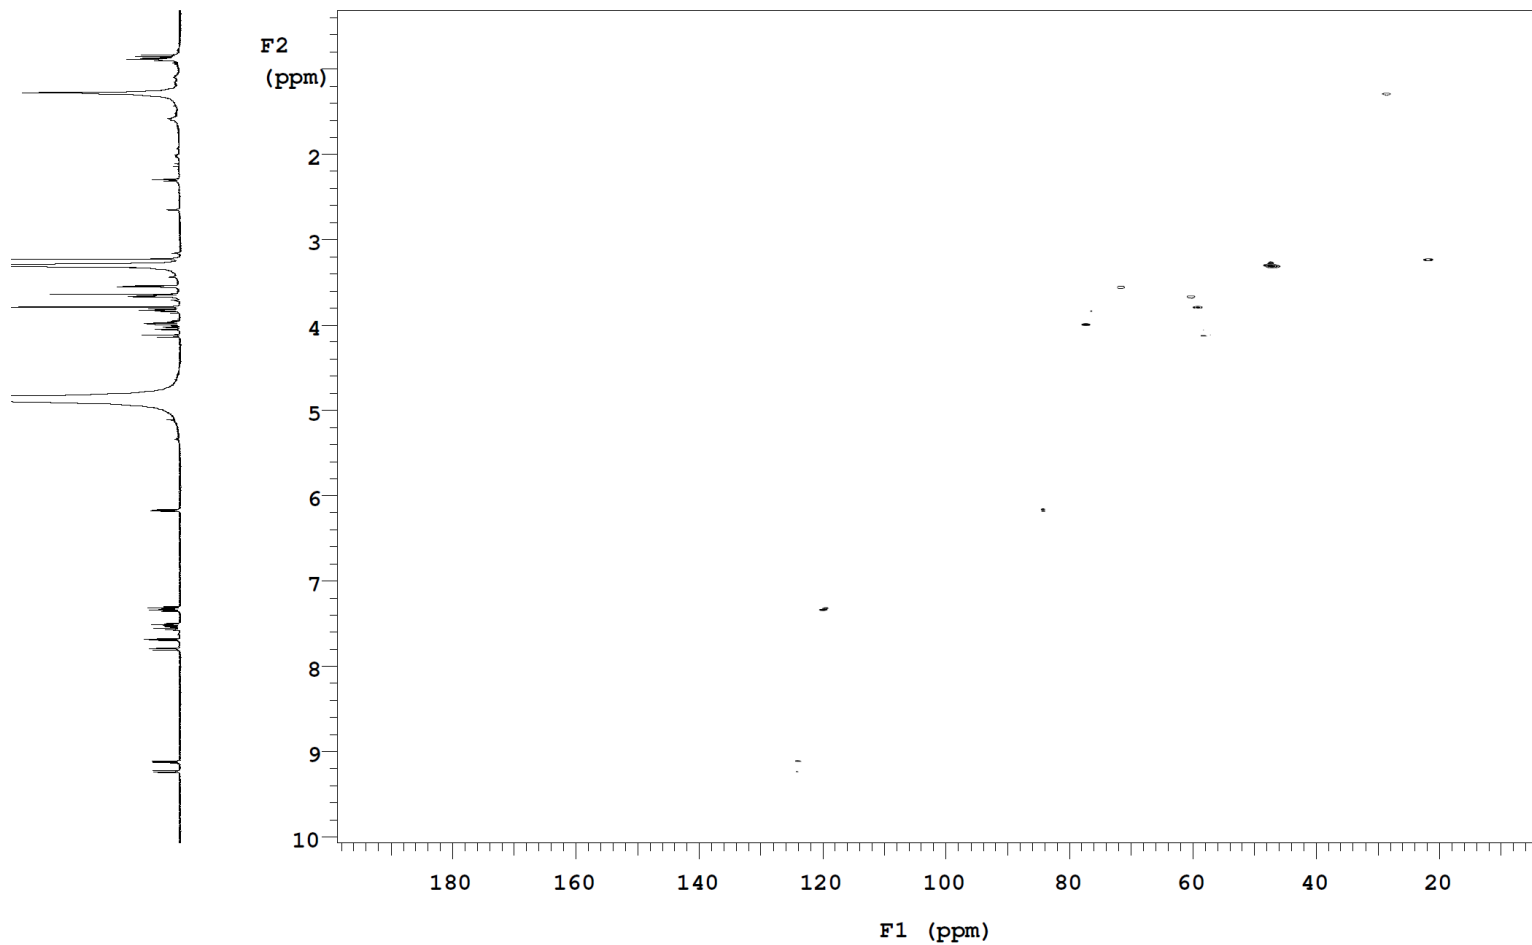

**Figure S40:** HSQC spectrum (CD<sub>3</sub>OD, 500 MHz) of AT2433-B3 (**4**)

500 MHz, CD<sub>3</sub>OD, 20 hrs  
Khaled A. Shaaban

Sample: Khaled\_A\_Shaaban  
File: xp

Pulse Sequence: gHMBC

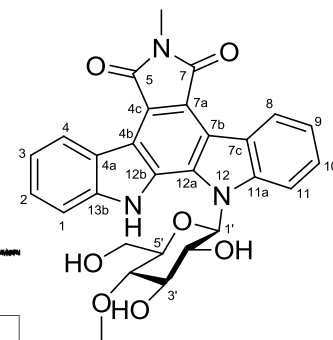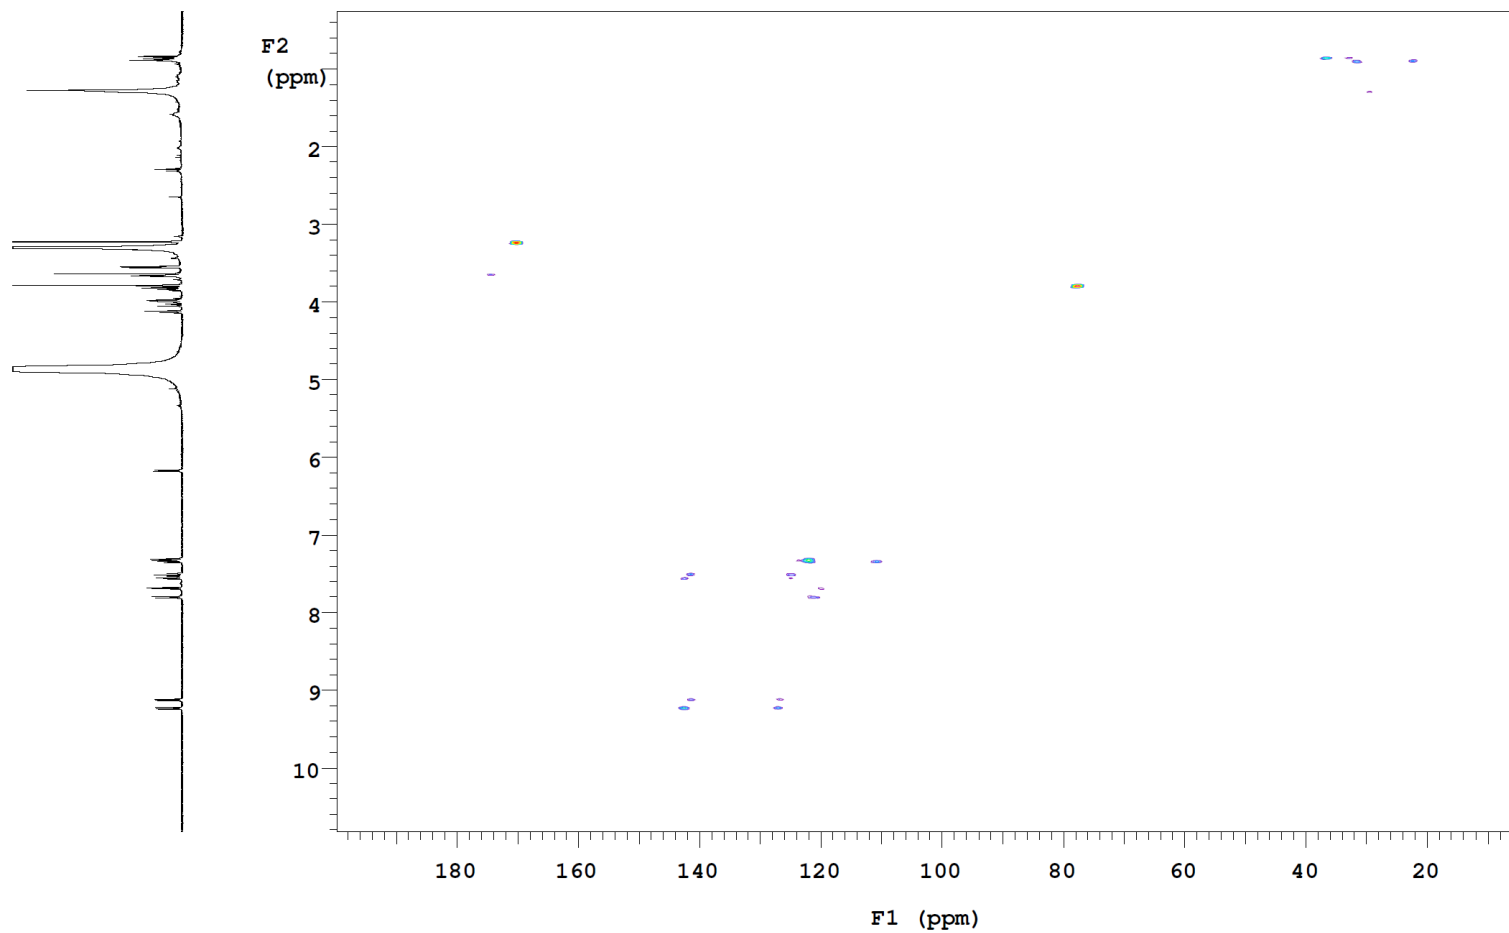

**Figure S41:** HMBC spectrum (CD<sub>3</sub>OD, 500 MHz) of AT2433-B3 (4)

500 MHz, CD<sub>3</sub>OD, 5 hrs  
Khaled A. Shaaban

Sample: Khaled\_A\_Shaaban  
File: xp

Pulse Sequence: TOCSY

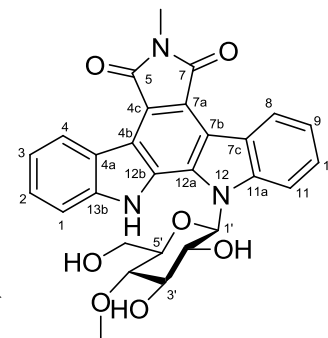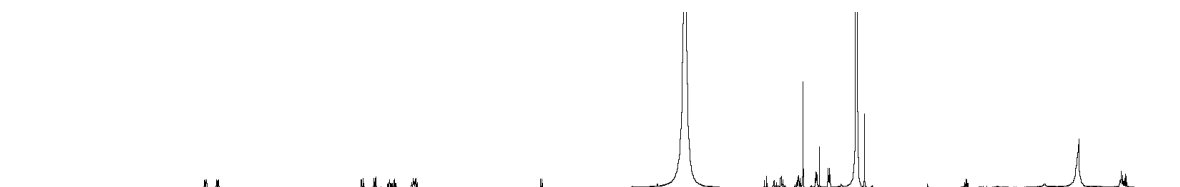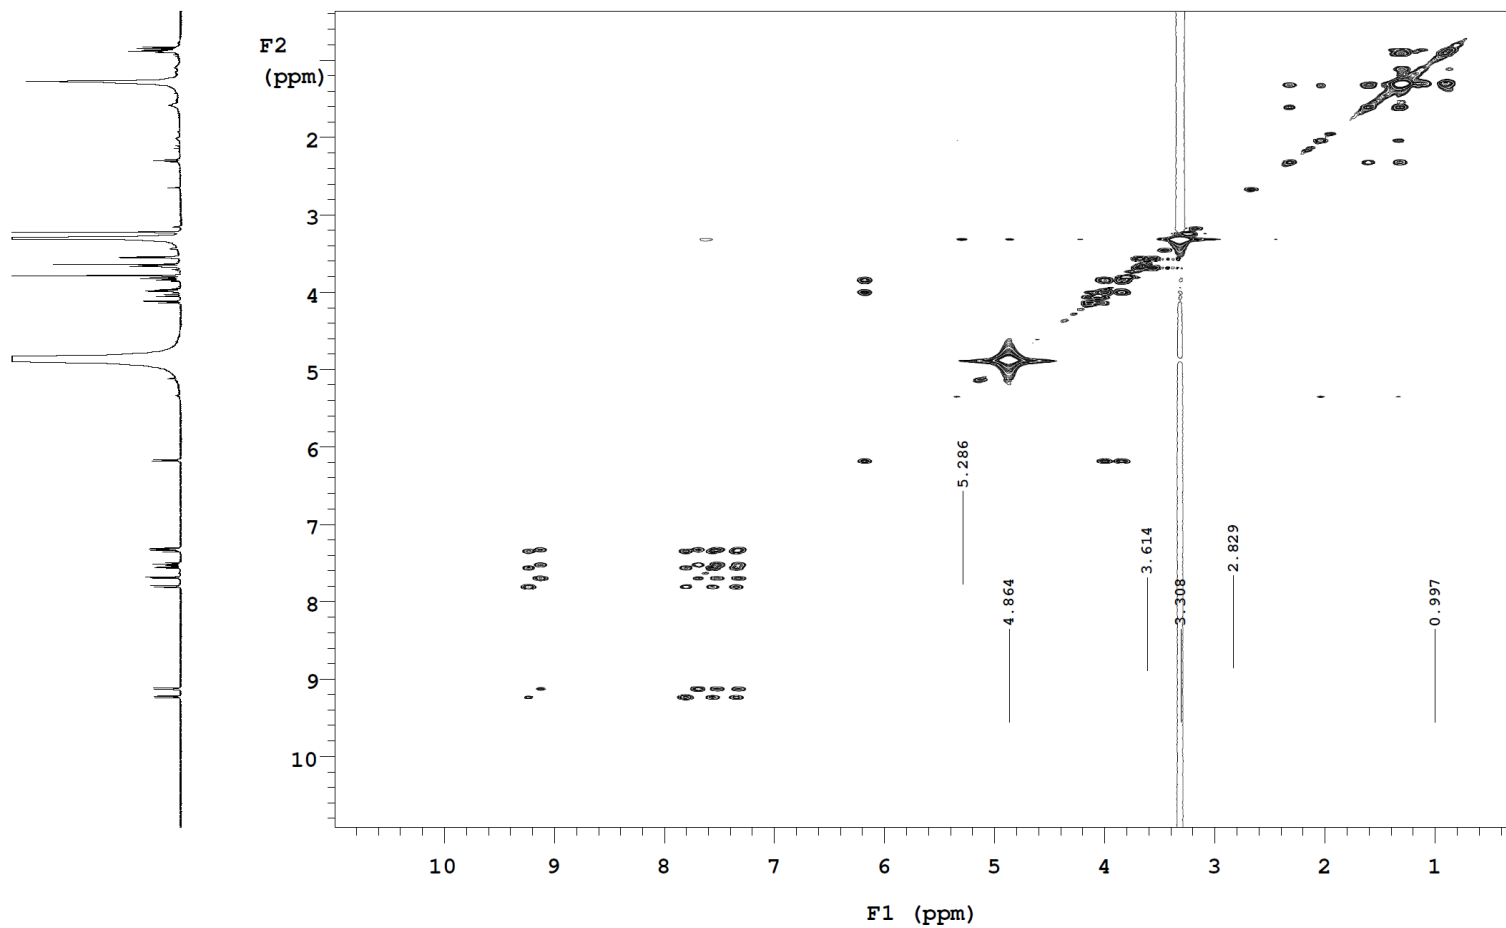

**Figure S42:** TOCSY spectrum (CD<sub>3</sub>OD, 500 MHz) of AT2433-B3 (**4**)

500 MHz, CD<sub>3</sub>OD, 9 hrs  
Khaled A. Shaaban

Sample: Khaled\_A\_Shaaban  
File: xp

Pulse Sequence: NOESY

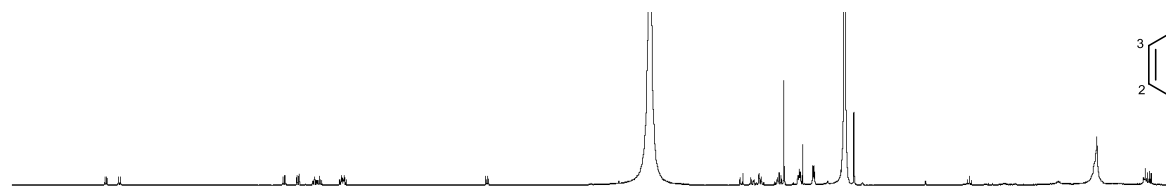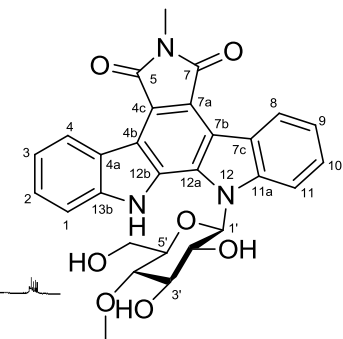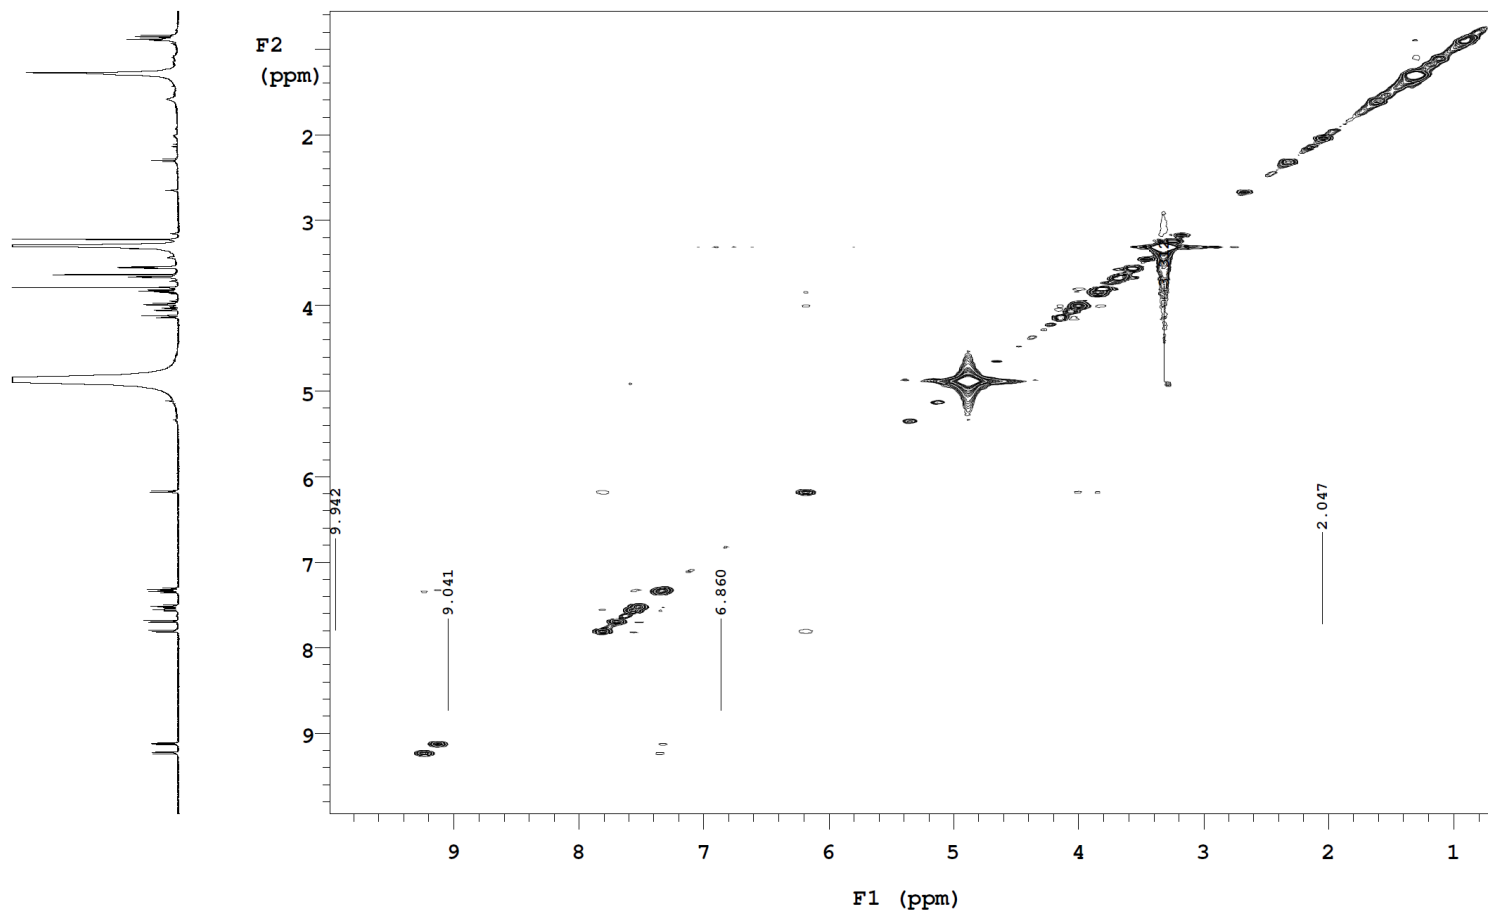

**Figure S43:** NOESY spectrum (CD<sub>3</sub>OD, 500 MHz) of AT2433-B3 (4)

Khaled A Shaaban  
CPRI\_11\_05\_2014\_KS\_ATCC39691\_F7A1

UK

05-Nov-2014  
3: Diode Array  
TIC  
3.06e8

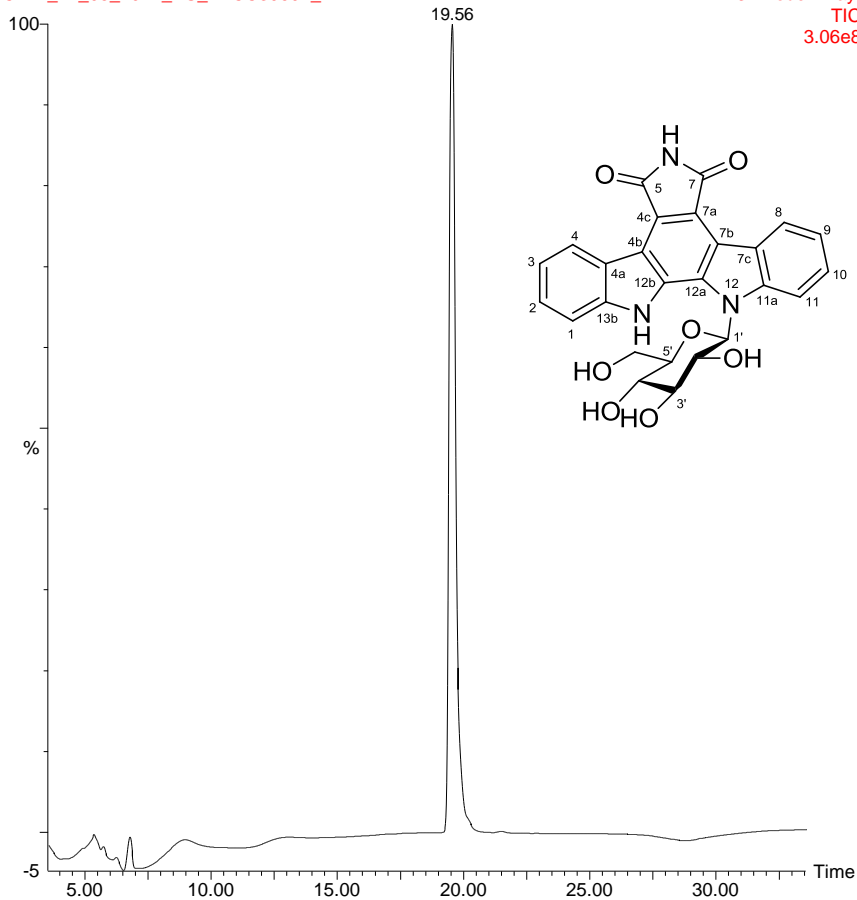

Khaled A Shaaban

CPRI\_11\_05\_2014\_KS\_ATCC39691\_F7A1 1167 (19.539)

3: Diode Array  
3.15e6

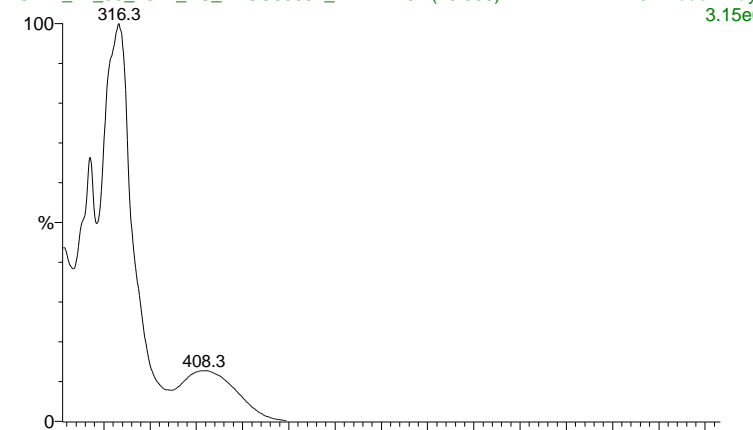

CPRI\_11\_05\_2014\_KS\_ATCC39691\_F7A1 485 (19.542)

1: Scan ES+  
1.20e6

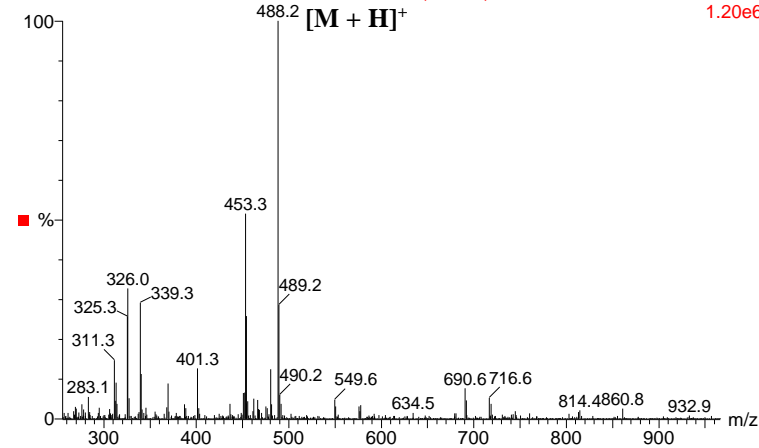

**Figure S44:** HPLC/UV/MS analyses of the purified BMY-41219 (**5**). Detection wavelength: 210-500; **solvent A:** H<sub>2</sub>O/0.1% Formic acid, **solvent B:** CH<sub>3</sub>CN/0.1% Formic acid; flow rate: 0.5 mL min<sup>-1</sup>; 0-4 min, 10% B; 4-22 min, 10-100% B; 22-27 min, 100% B; 27-29 min, 100%-10% B; 29-35 min, 10 % B.

14-0528 #59-88 RT: 1.55-2.31 AV: 30 NL: 8.92E6

T: FTMS - p ESI Full ms [350.00-950.00]

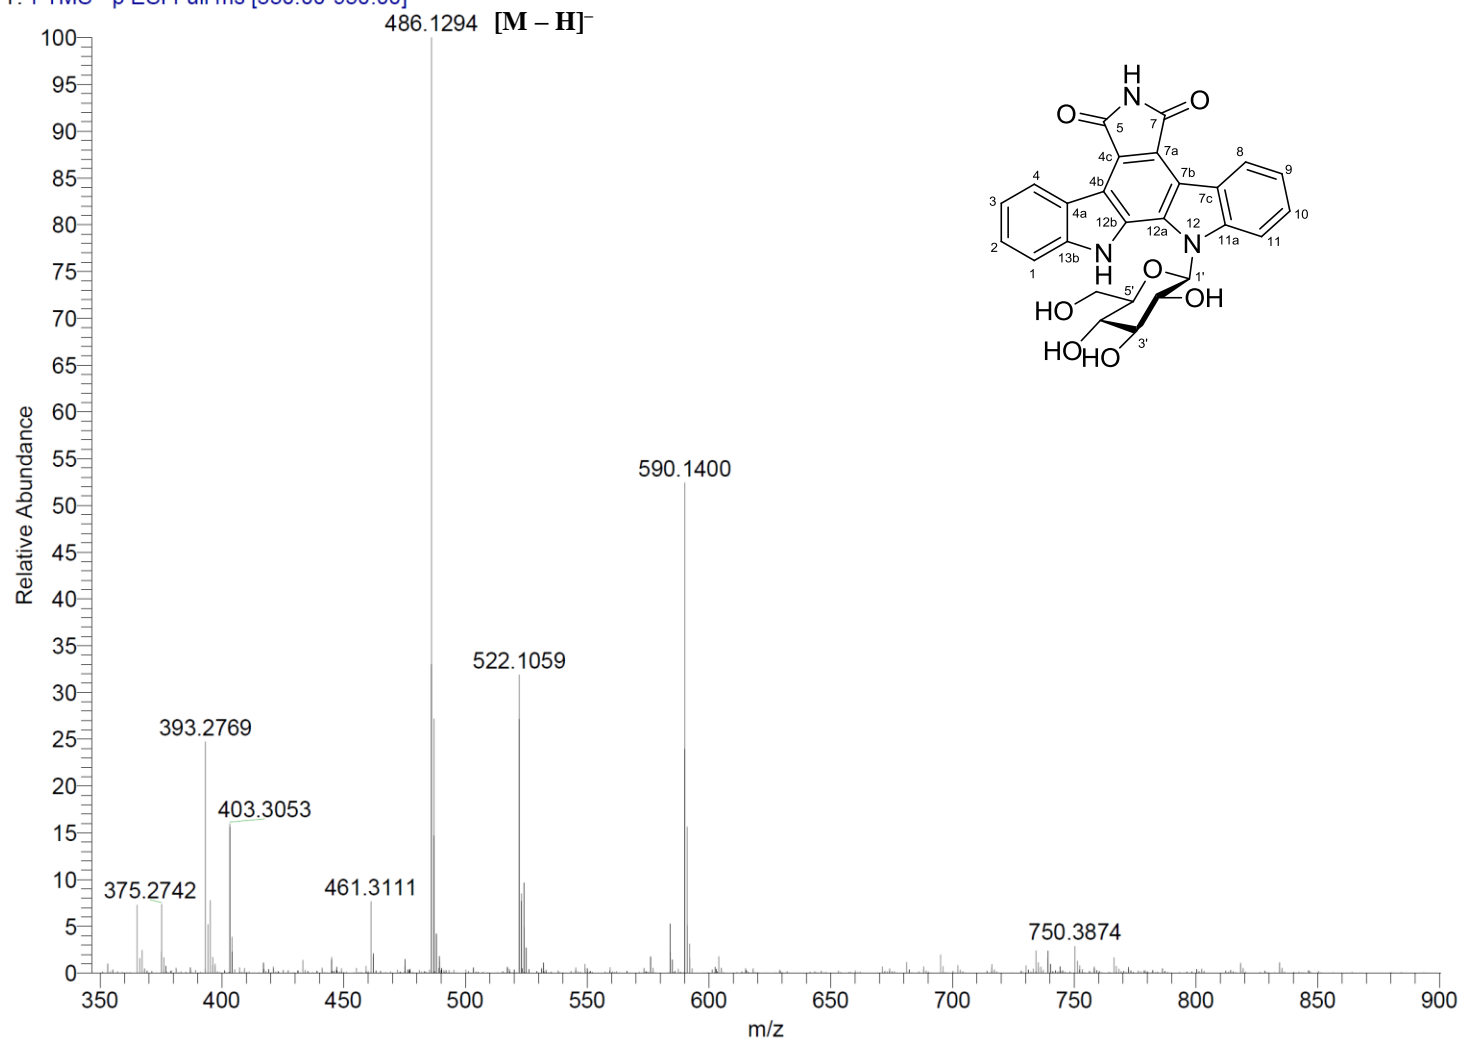**Figure S45:** (-)-HRESI-MS spectrum of BMY-41219 (5)

14-0528 #121-133 RT: 3.18-3.49 AV: 13 NL: 1.03E7

T: FTMS + p ESI Full lock ms [350.00-1500.00]

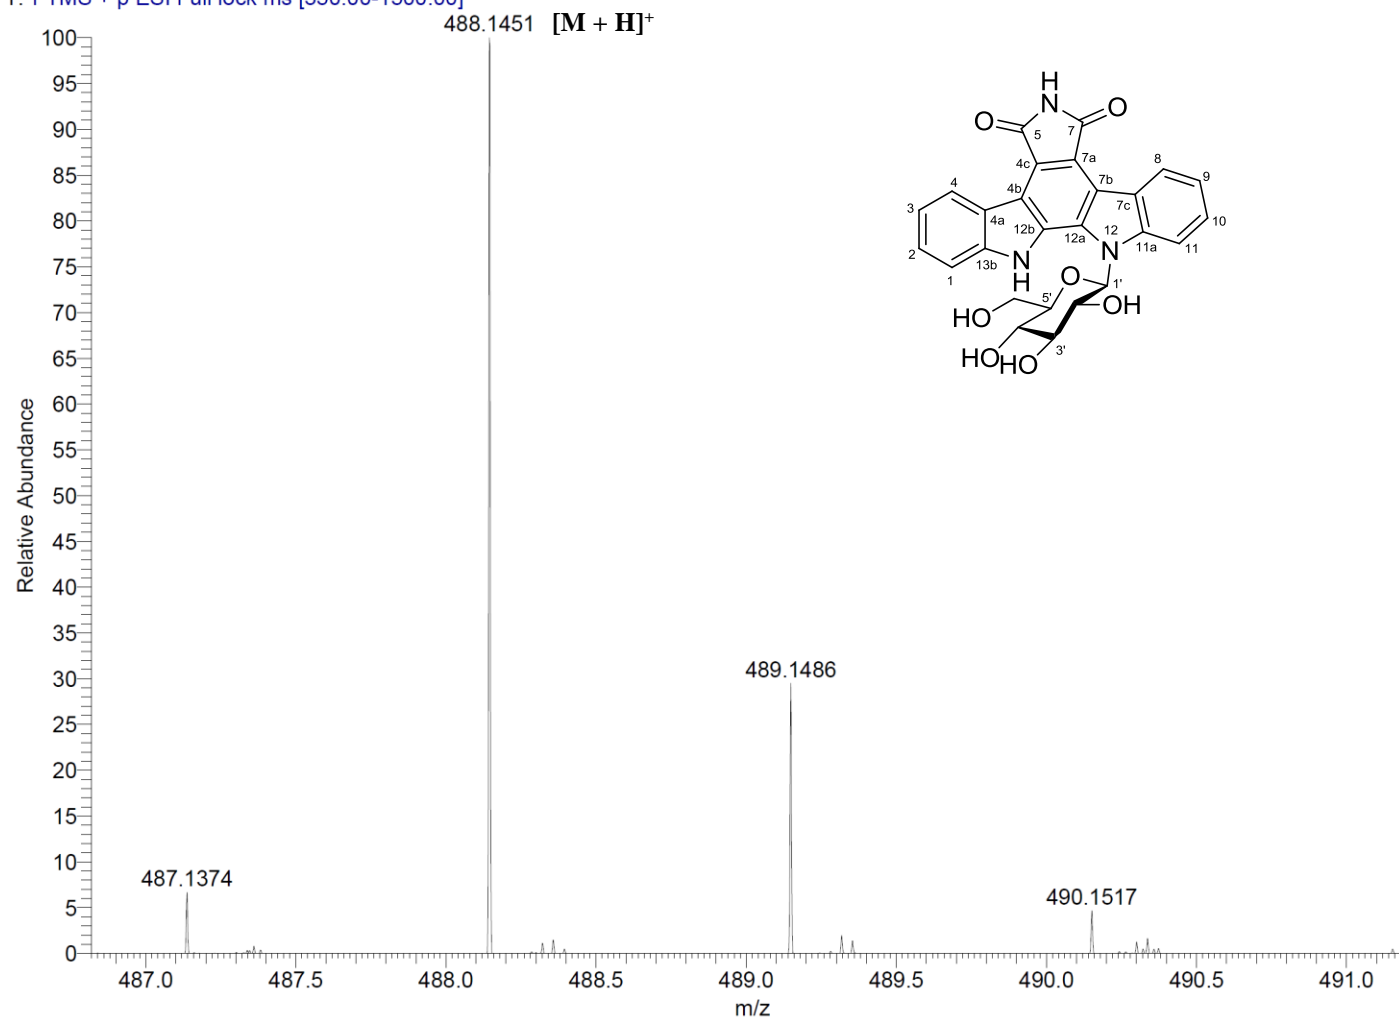**Figure S46:** (+)-HRESI-MS spectrum of BMY-41219 (5)



500 MHz, CD3OD, nt=32  
Khaled A. Shaaban

Sample: Khaled\_A\_Shaaban  
File: xp

Pulse Sequence: s2pul

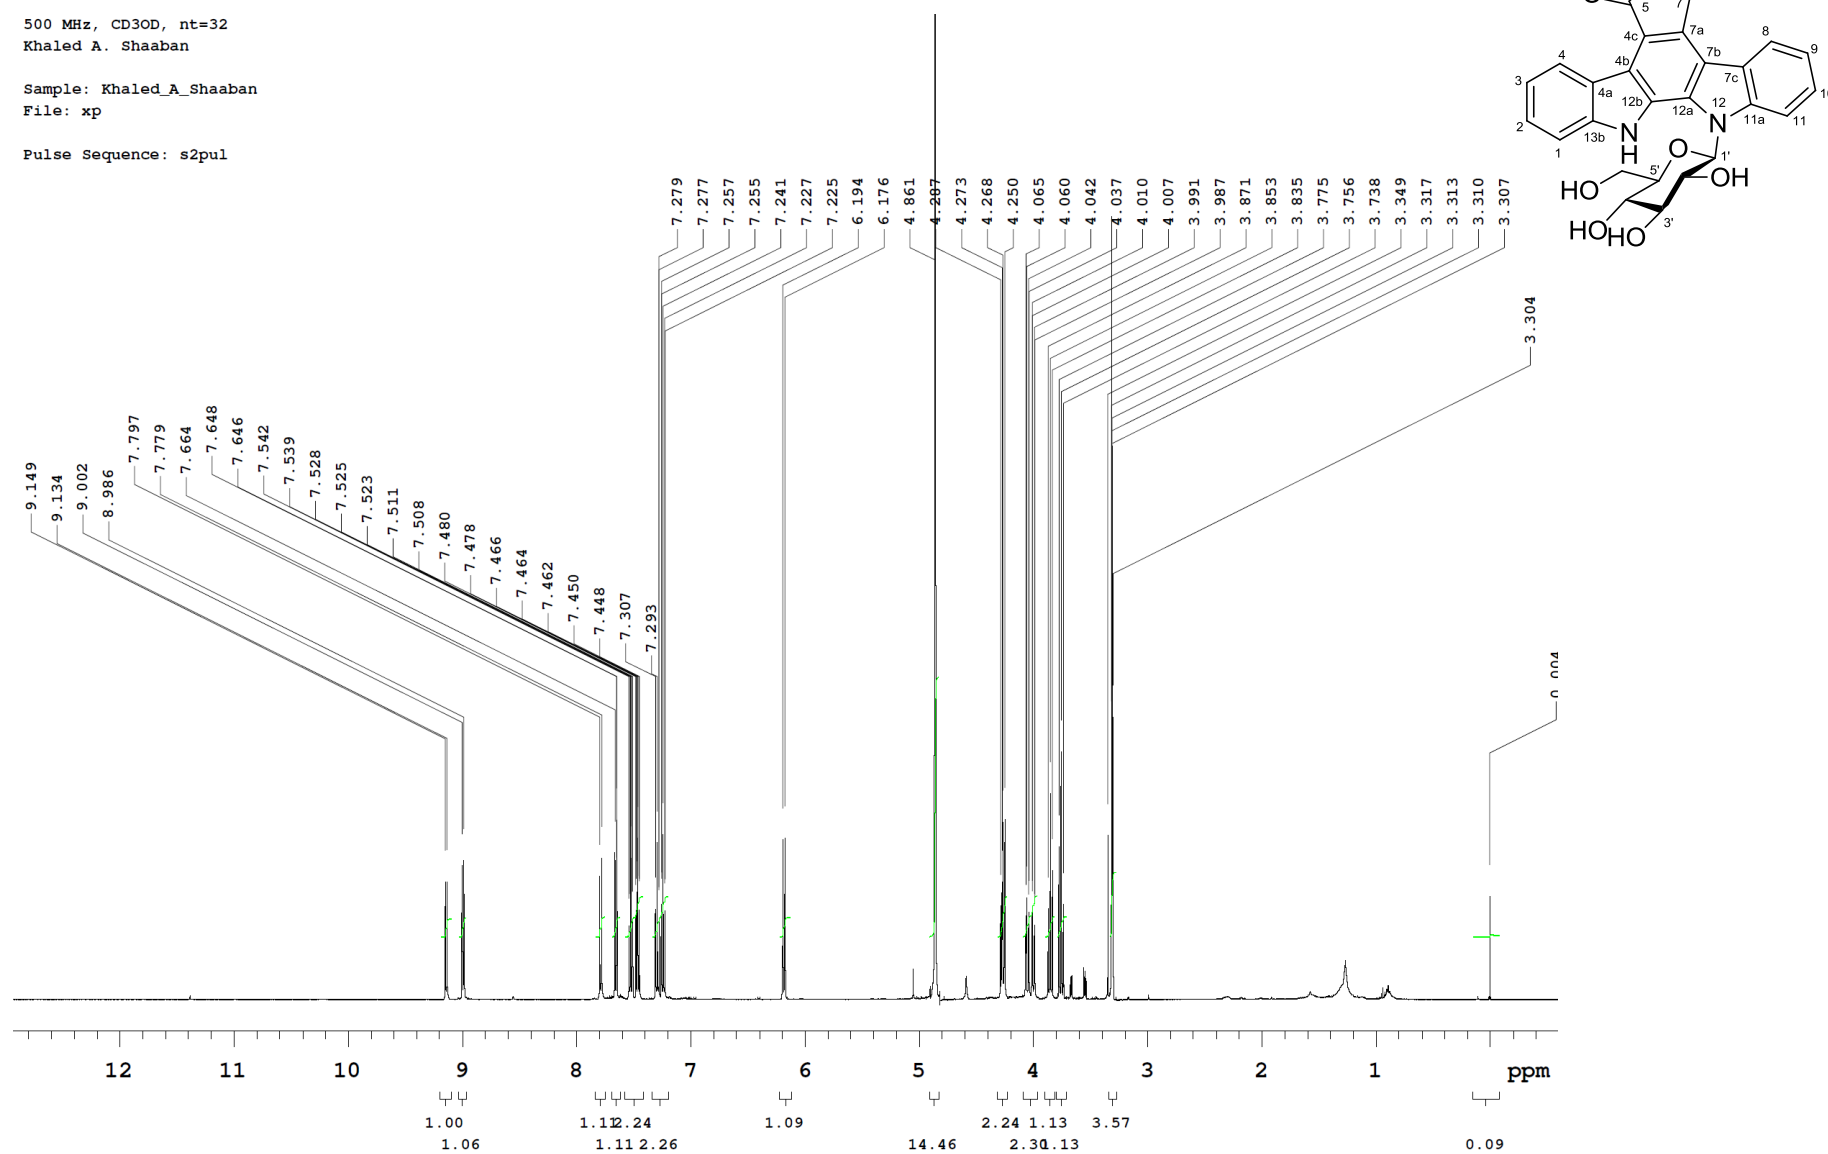

Figure S47: <sup>1</sup>H NMR spectrum (CD<sub>3</sub>OD, 500 MHz) of BMY-41219 (5)

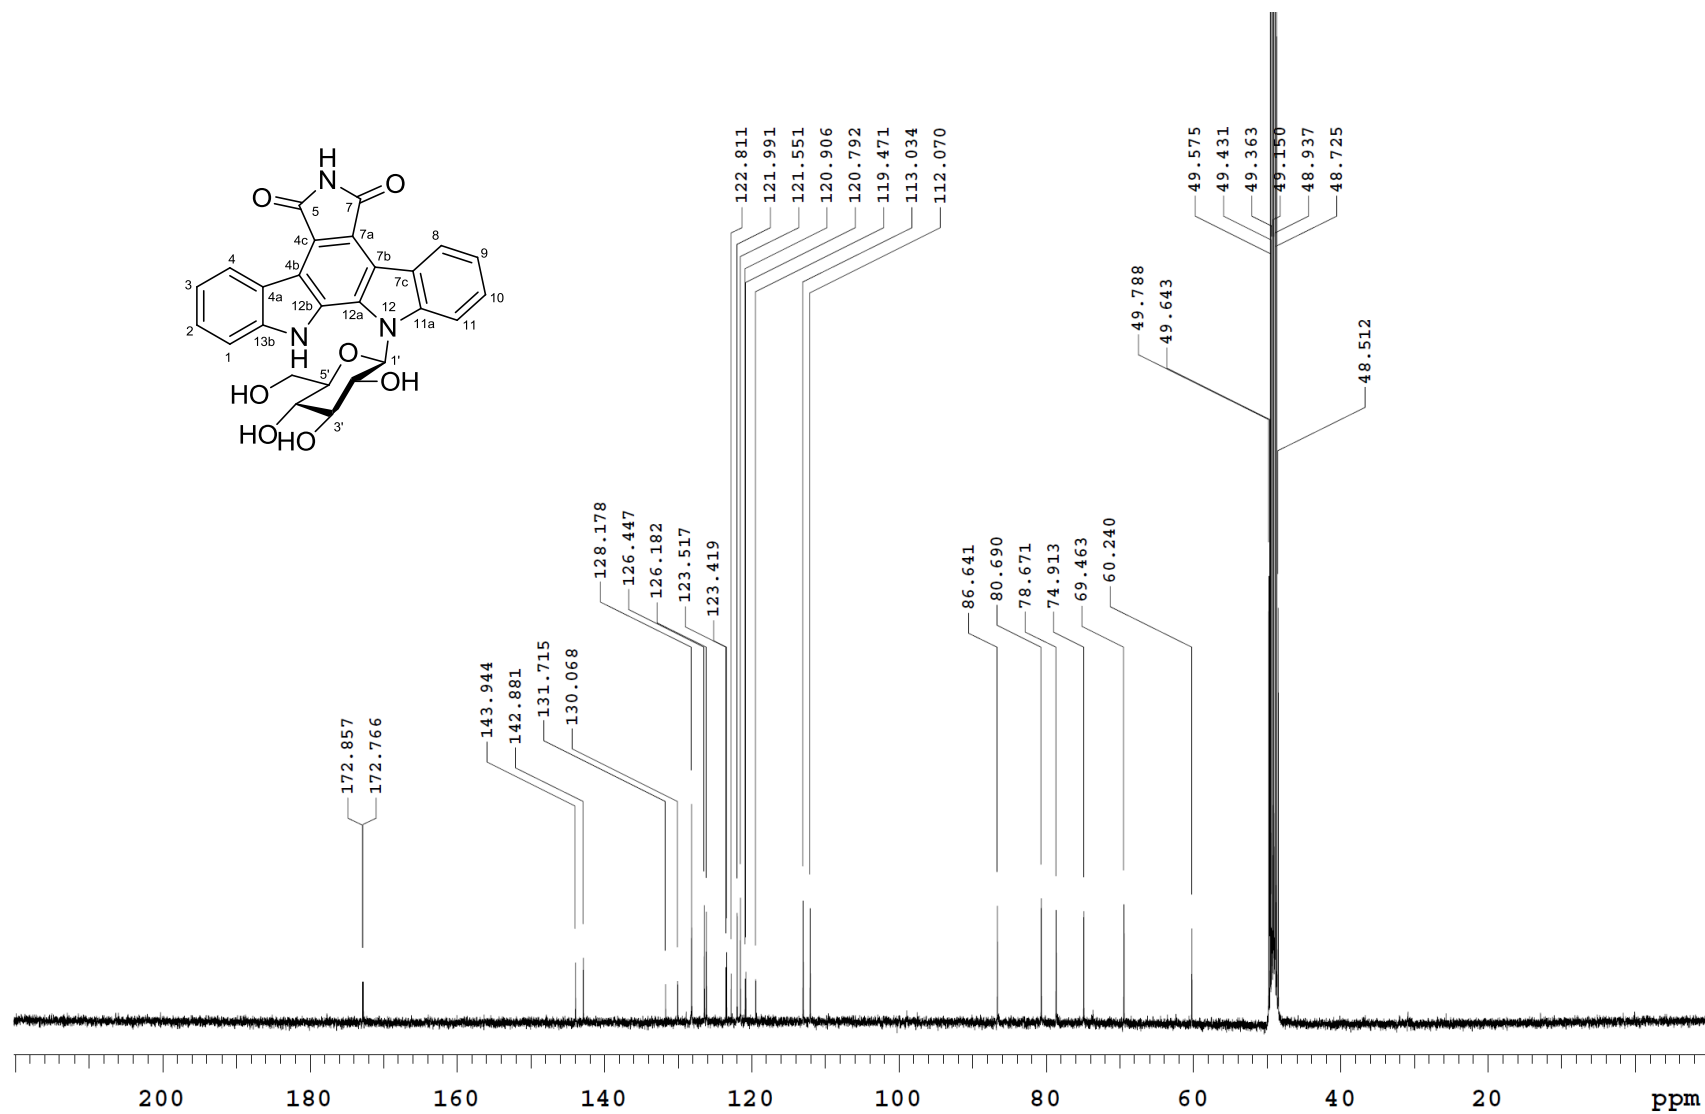

**Figure S48:** <sup>13</sup>C NMR spectrum (CD<sub>3</sub>OD, 100 MHz) of BMY-41219 (5)

KS\_ATCC39691\_F7A1\_gCOSY\_11\_05\_2014  
500 MHz, CD3OD, 80 min  
Khaled A. Shaaban

Sample: Khaled\_A\_Shaaban  
File: xp

Pulse Sequence: gCOSY

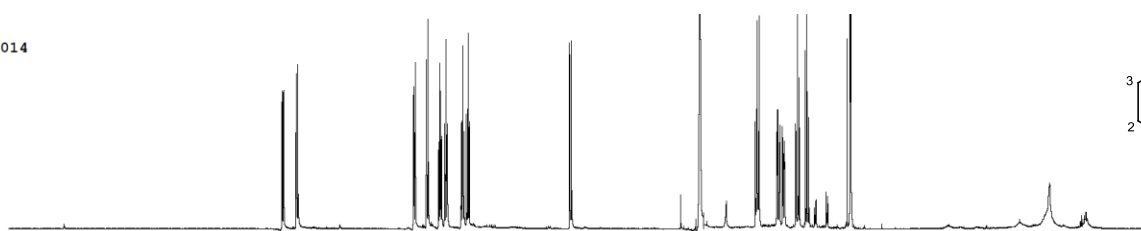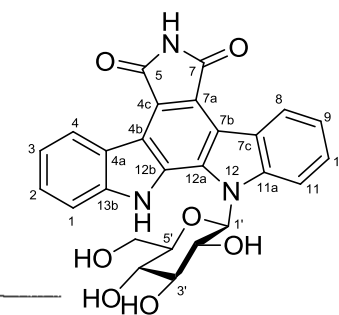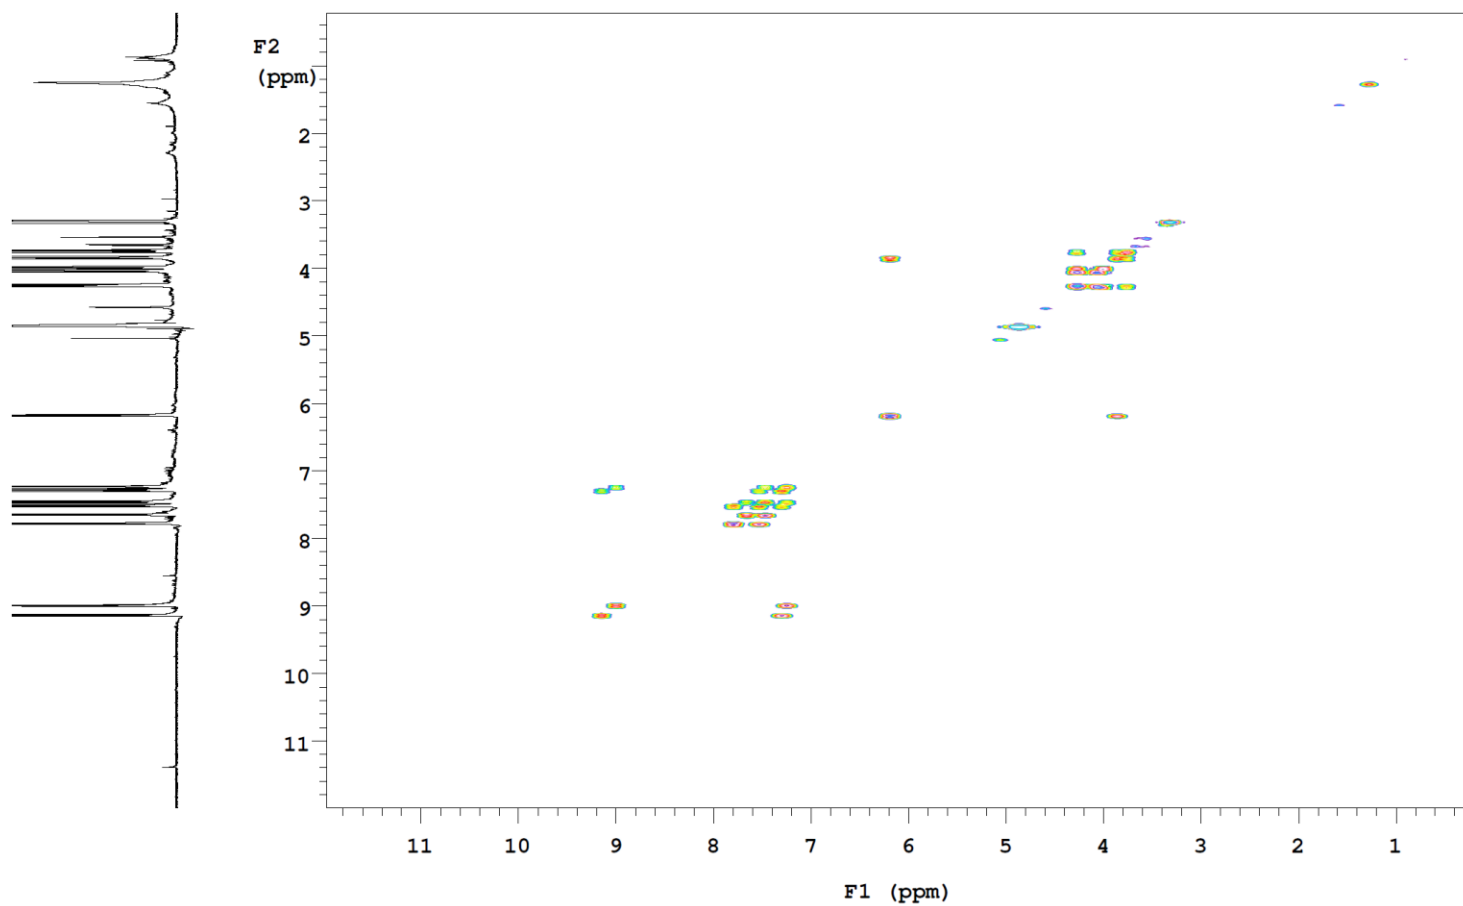

**Figure S49:**  $^1\text{H}$ - $^1\text{H}$  COSY spectrum ( $\text{CD}_3\text{OD}$ , 500 MHz) of BMY-41219 (**5**)

KS\_ATCC39691\_F7A1\_gHSQC\_11\_06\_2014  
500 MHz, CD3OD, 3 hrs  
Khaled A. Shaaban

Sample: Khaled\_A\_Shaaban  
File: xp

Pulse Sequence: gHSQC

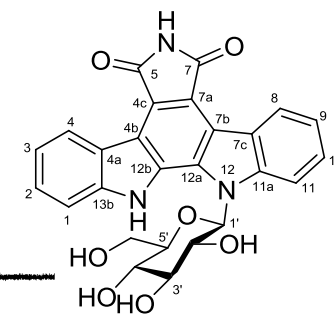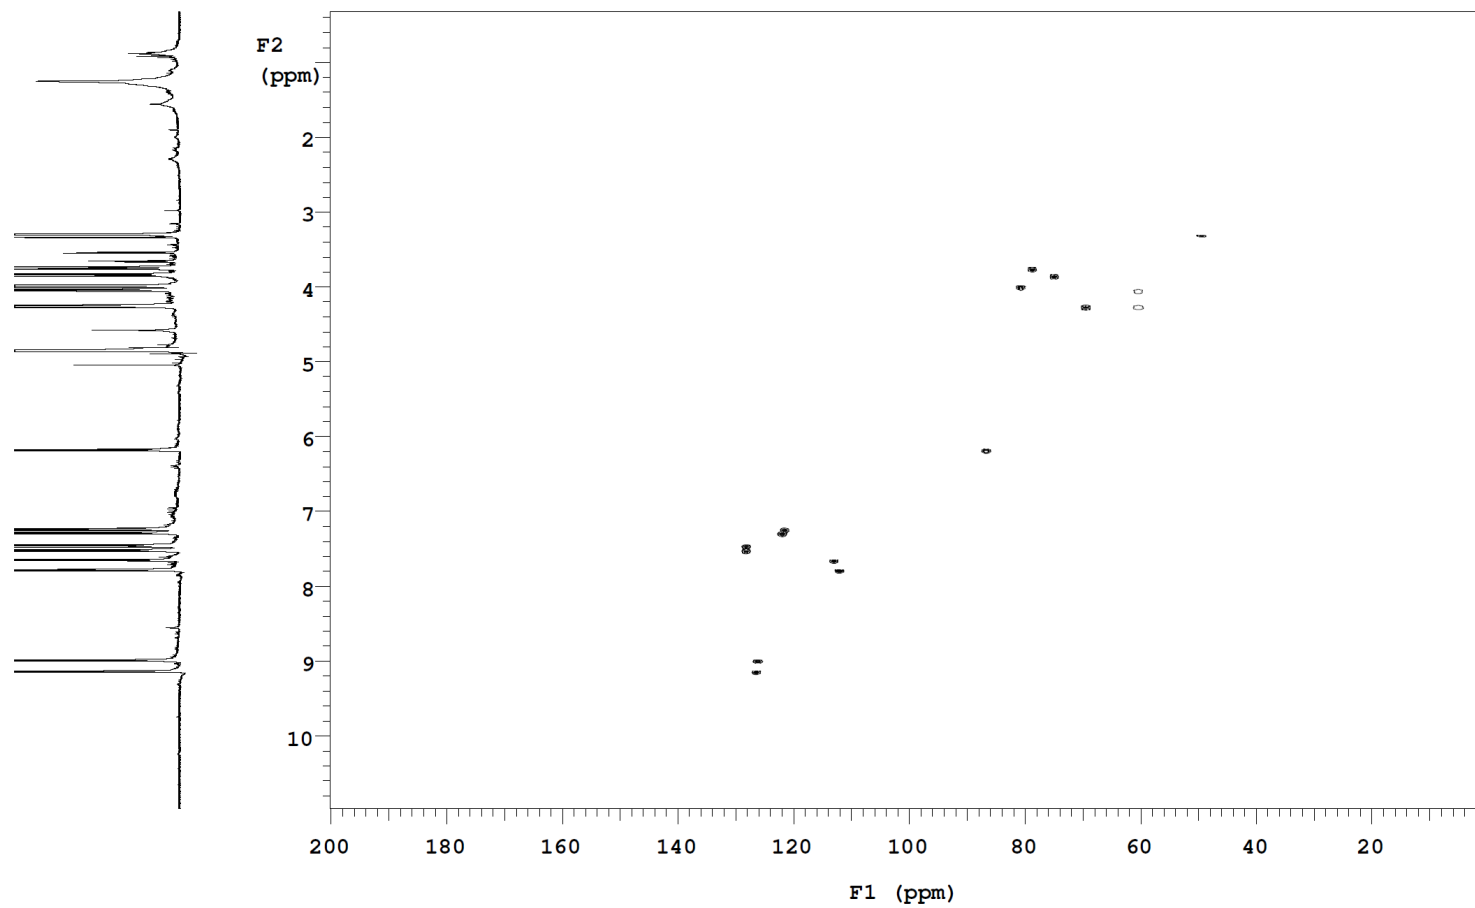

**Figure S50:** HSQC spectrum (CD<sub>3</sub>OD, 100 MHz) of BMY-41219 (5)

KS\_ATCC39691\_F7A1\_gHMBC\_11\_06\_2014  
500 MHz, CD3OD, 11 hrs  
Khaled A. Shaaban

Sample: Khaled\_A\_Shaaban  
File: xp

Pulse Sequence: gHMBC

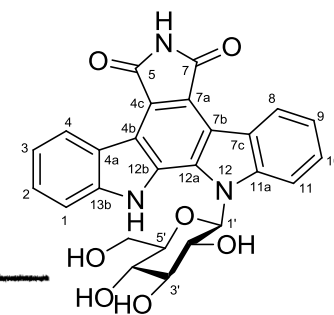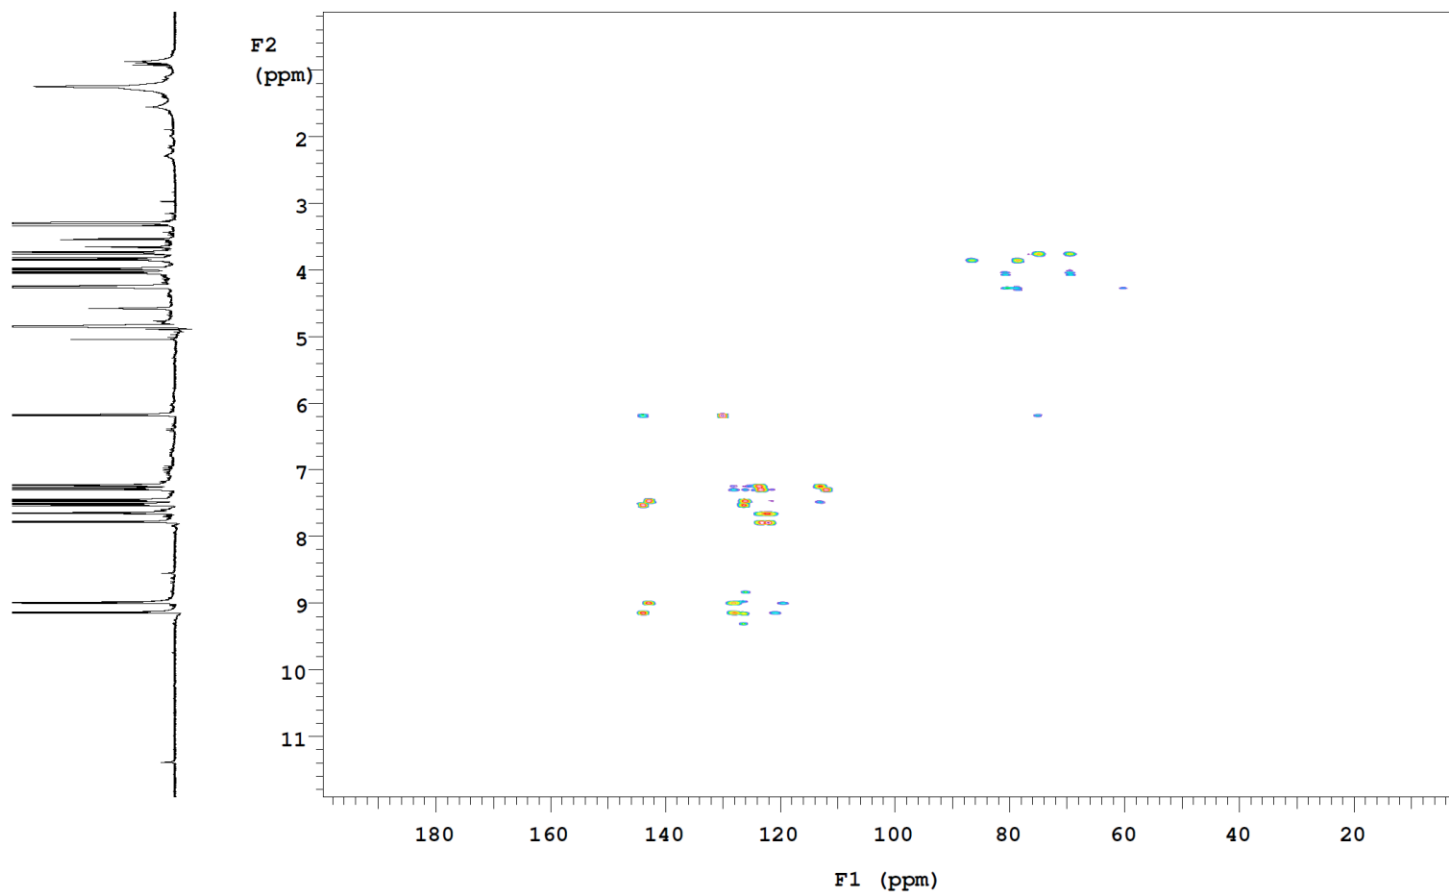

**Figure S51:** HMBC spectrum (CD<sub>3</sub>OD, 100 MHz) of BMY-41219 (5)

KS\_ATCC39691\_F7A1\_TOCSY\_11\_06\_2014  
500 MHz, CD3OD, 3 hrs  
Khaled A. Shaaban

Sample: Khaled\_A\_Shaaban  
File: xp

Pulse Sequence: TOCSY

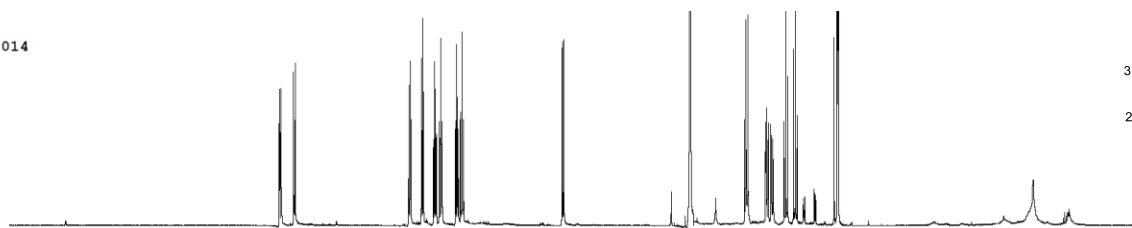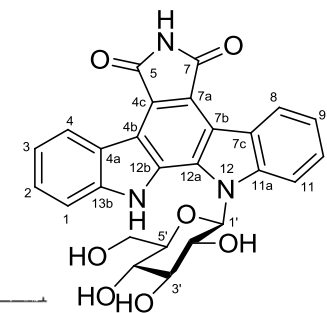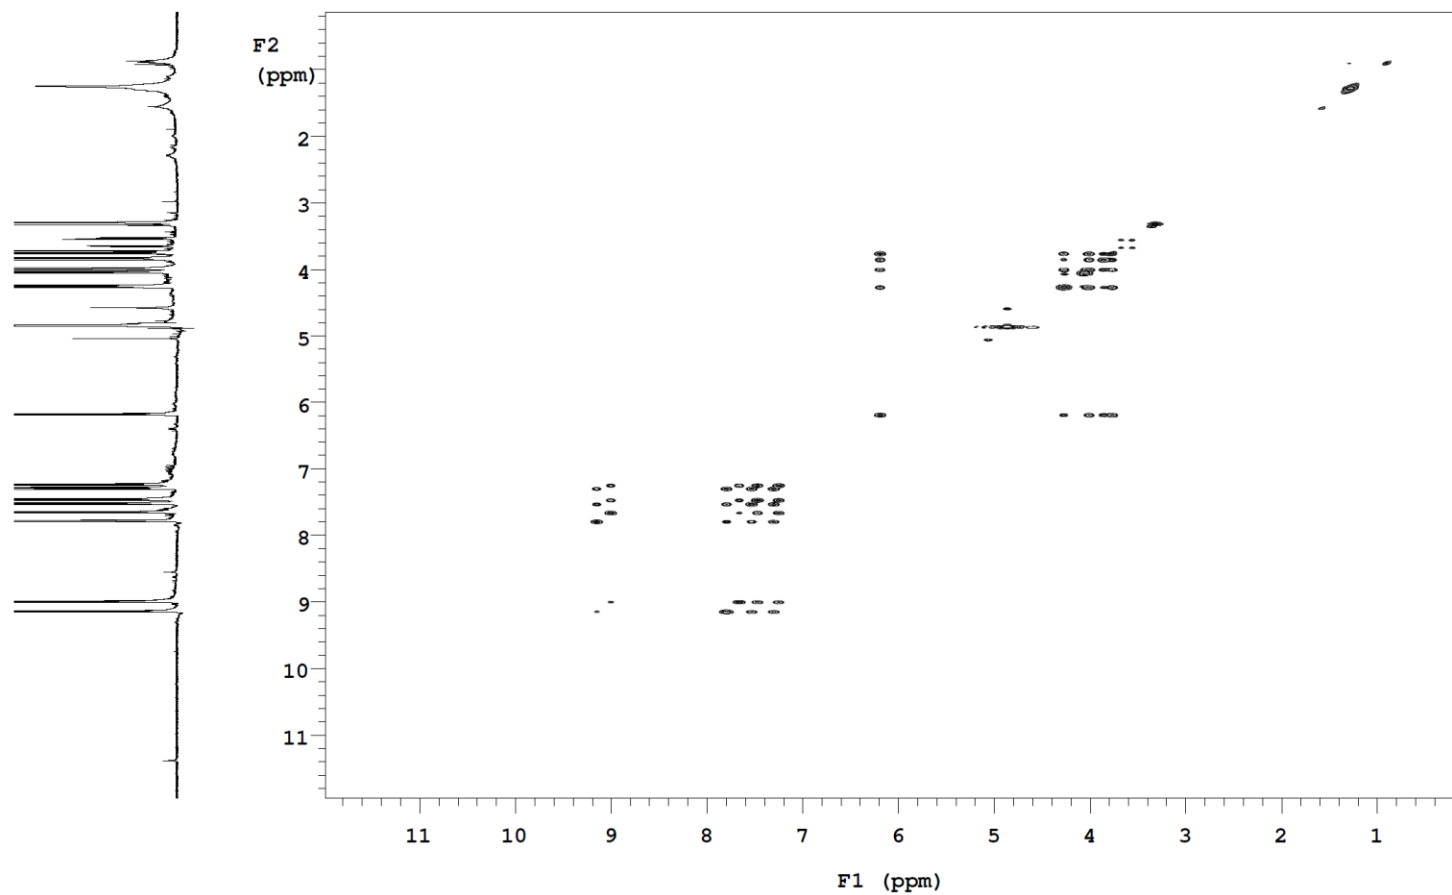

Figure S52: TOCSY spectrum (CD<sub>3</sub>OD, 100 MHz) of BMY-41219 (5)

KS\_ATCC39691\_F7A1\_NOESY\_11\_08\_2014  
500 MHz, CD3OD, 18 hrs  
Khaled A. Shaaban

Sample: Khaled\_A\_Shaaban  
File: xp

Pulse Sequence: NOESY

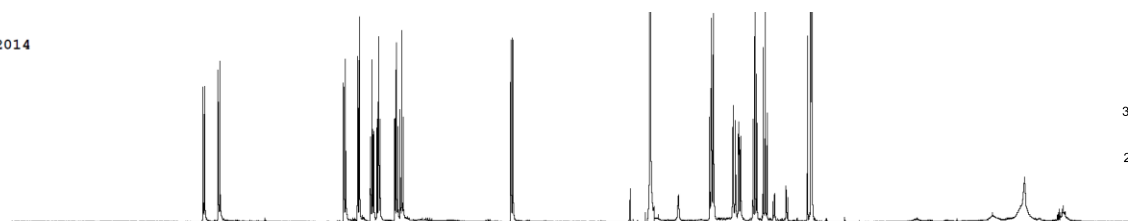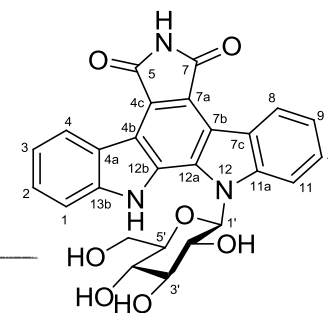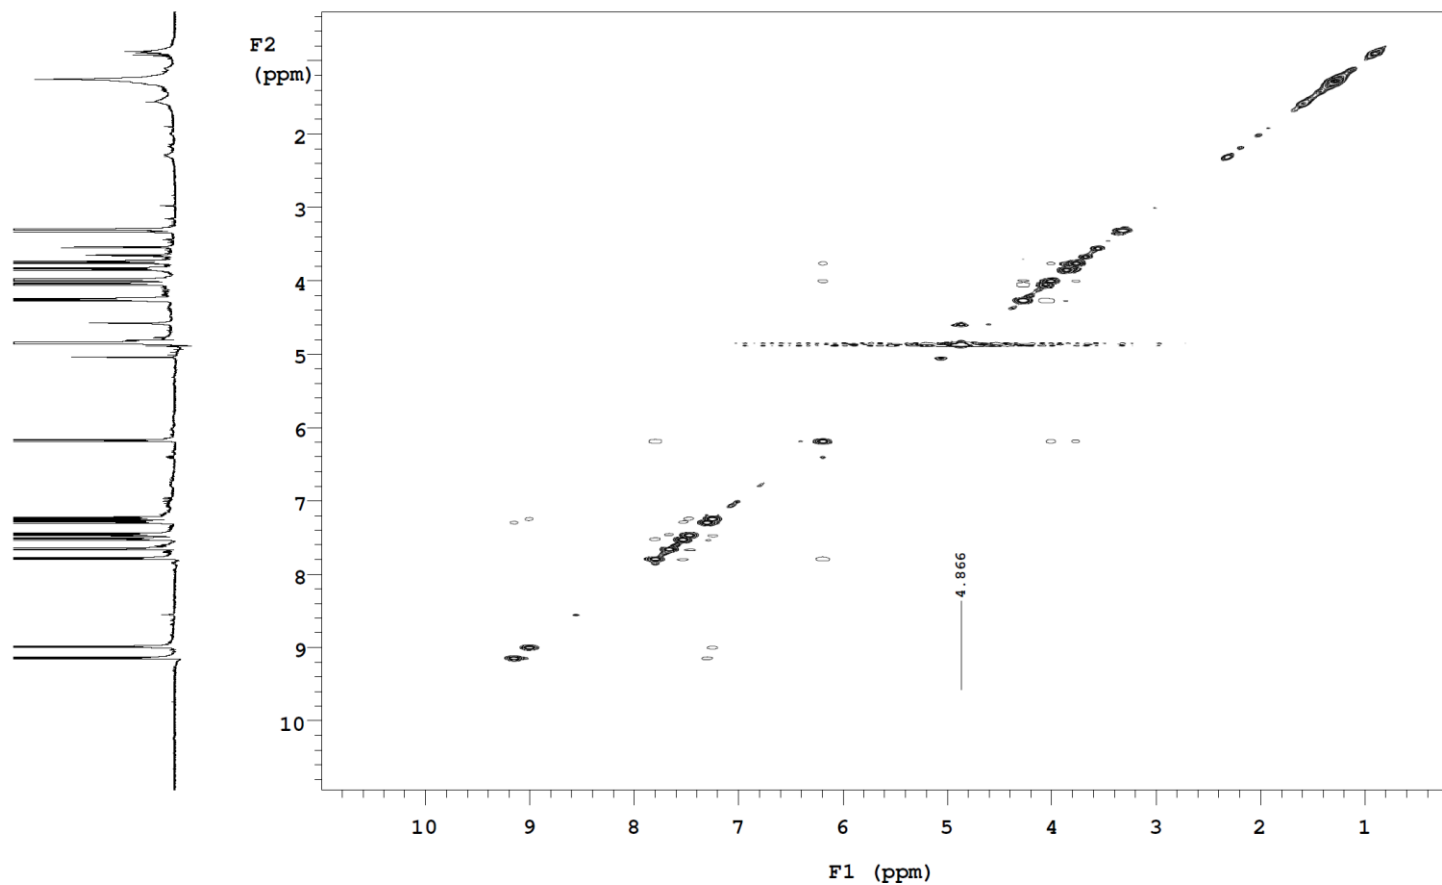

**Figure S53:** NOESY spectrum (CD<sub>3</sub>OD, 100 MHz) of BMY-41219 (**5**)

Khaled A Shaaban  
CPRI\_10\_23\_2014\_KS\_ATCC39691\_F11H

UK

22-Oct-2014  
3: Diode Array  
TIC  
3.44e8

Khaled A Shaaban

CPRI\_10\_23\_2014\_KS\_ATCC39691\_F11H 1166 (19.525)

3: Diode Array  
3.18e6

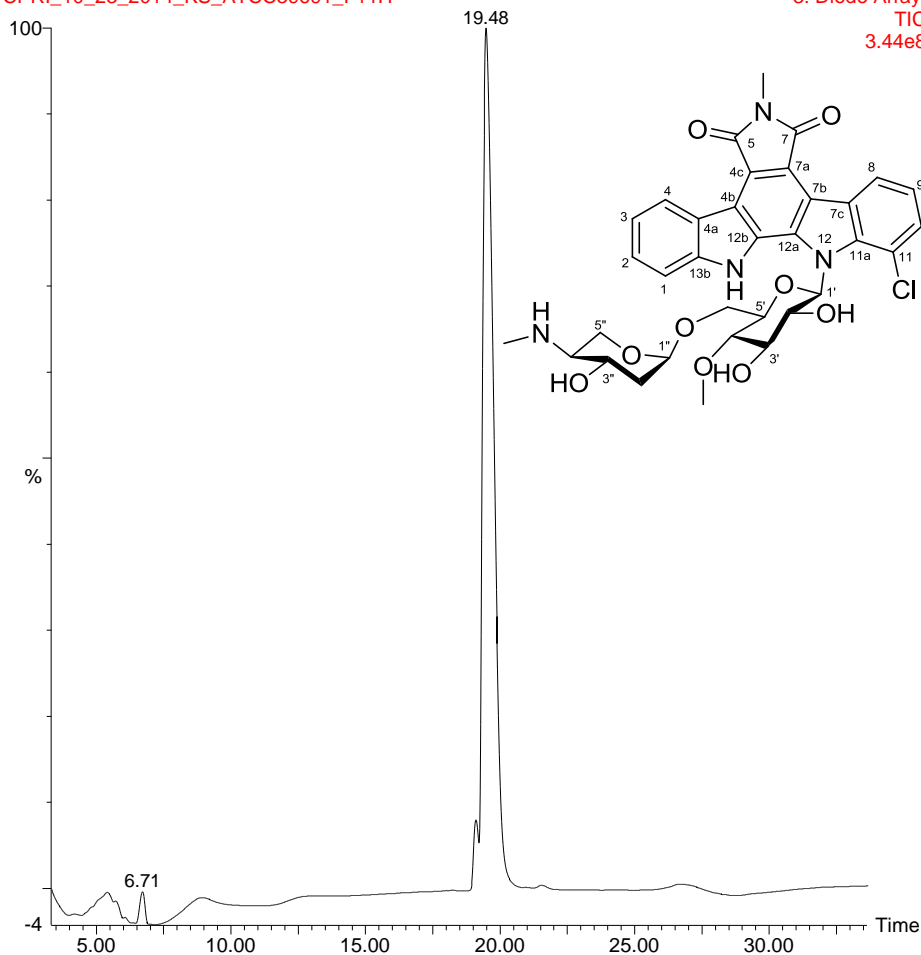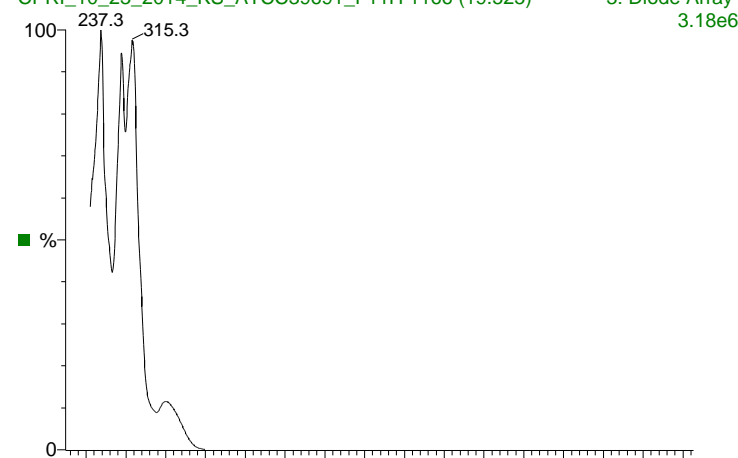

CPRI\_10\_23\_2014\_KS\_ATCC39691\_F11H 485 (19.542) 1: Scan ES+  
2.49e7

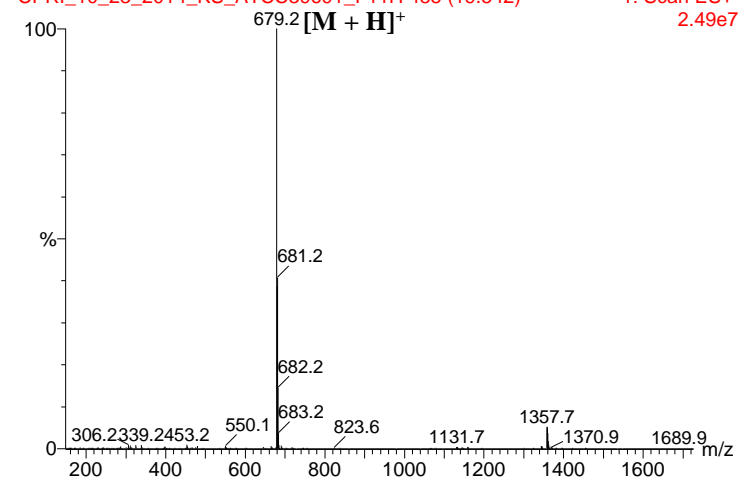

**Figure S54:** HPLC/UV/MS analyses of AT2433-A1 (**6**). Detection wavelength: 210-500; **solvent A:** H<sub>2</sub>O/0.1% Formic acid, **solvent B:** CH<sub>3</sub>CN/0.1% Formic acid; flow rate: 0.5 mL min<sup>-1</sup>; 0-4 min, 10% B; 4-22 min, 10-100% B; 22-27 min, 100% B; 27-29 min, 100%-10% B; 29-35 min, 10 % B.



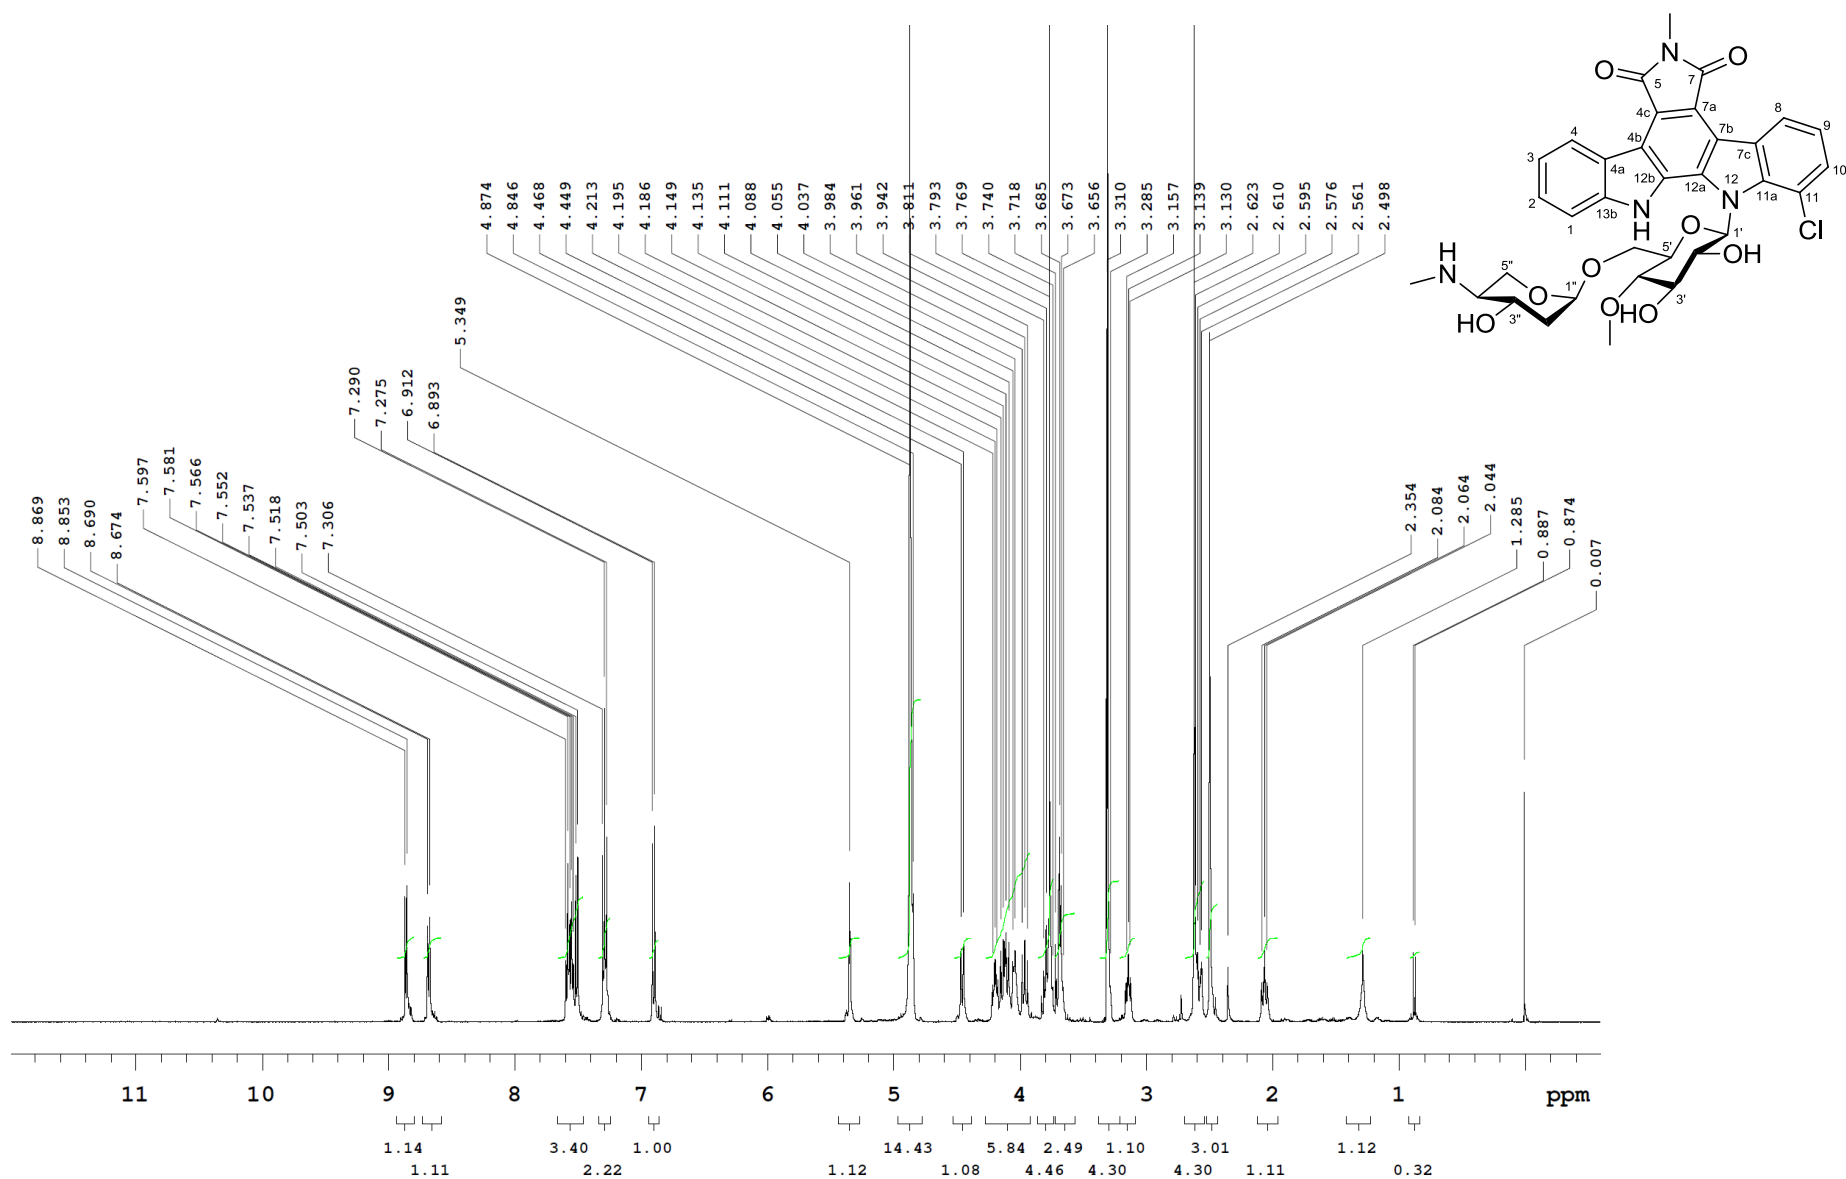

Figure S55: <sup>1</sup>H NMR spectrum (CD<sub>3</sub>OD, 500 MHz) of AT2433-A1 (6)

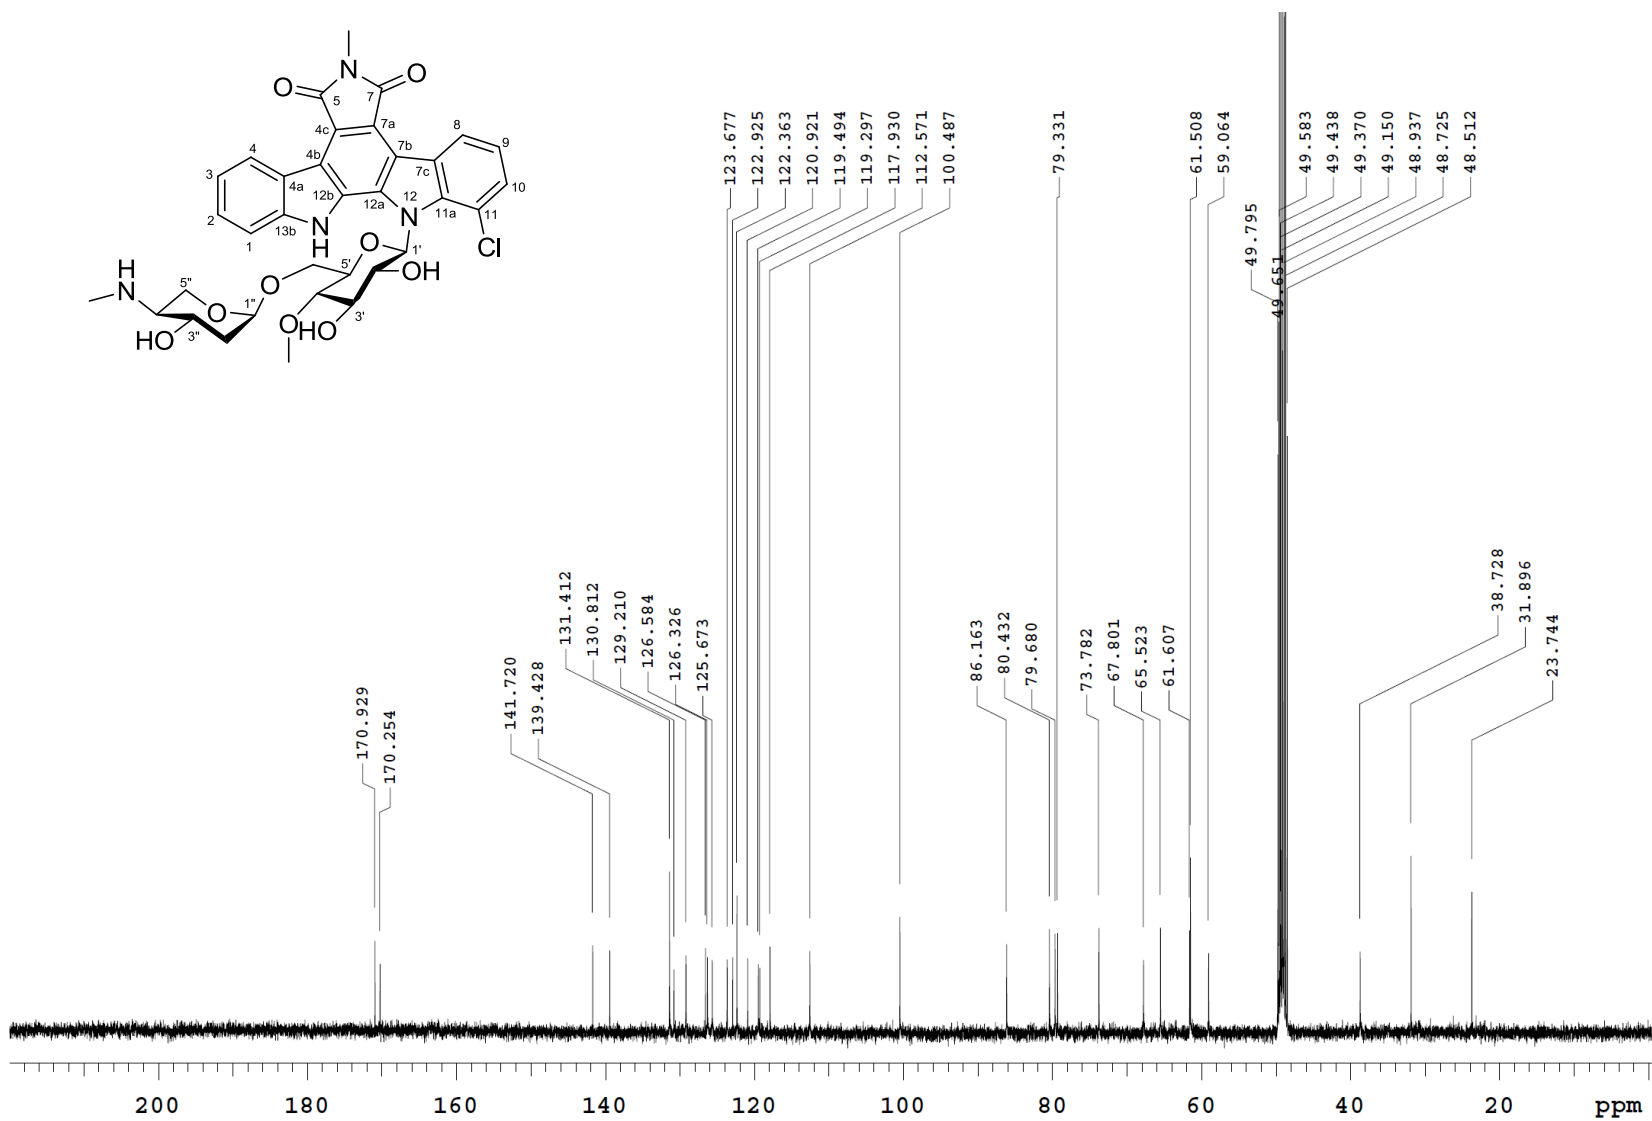

Figure S56: <sup>13</sup>C NMR spectrum (CD<sub>3</sub>OD, 100 MHz) of AT2433-A1 (6)

500 MHz, CD<sub>3</sub>OD, 80 min  
Khaled A. Shaaban

Sample: Khaled\_A\_Shaaban  
File: xp

Pulse Sequence: gCOSY

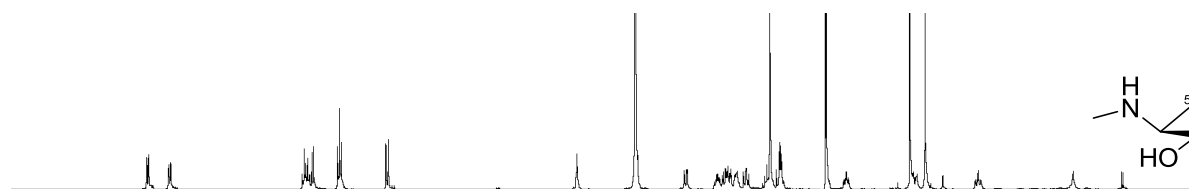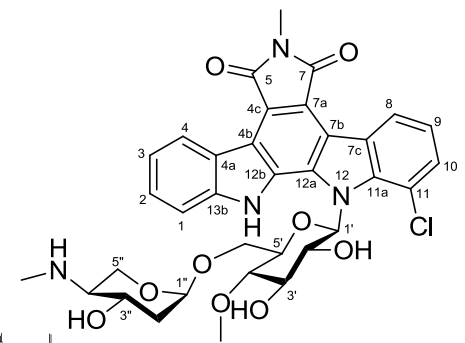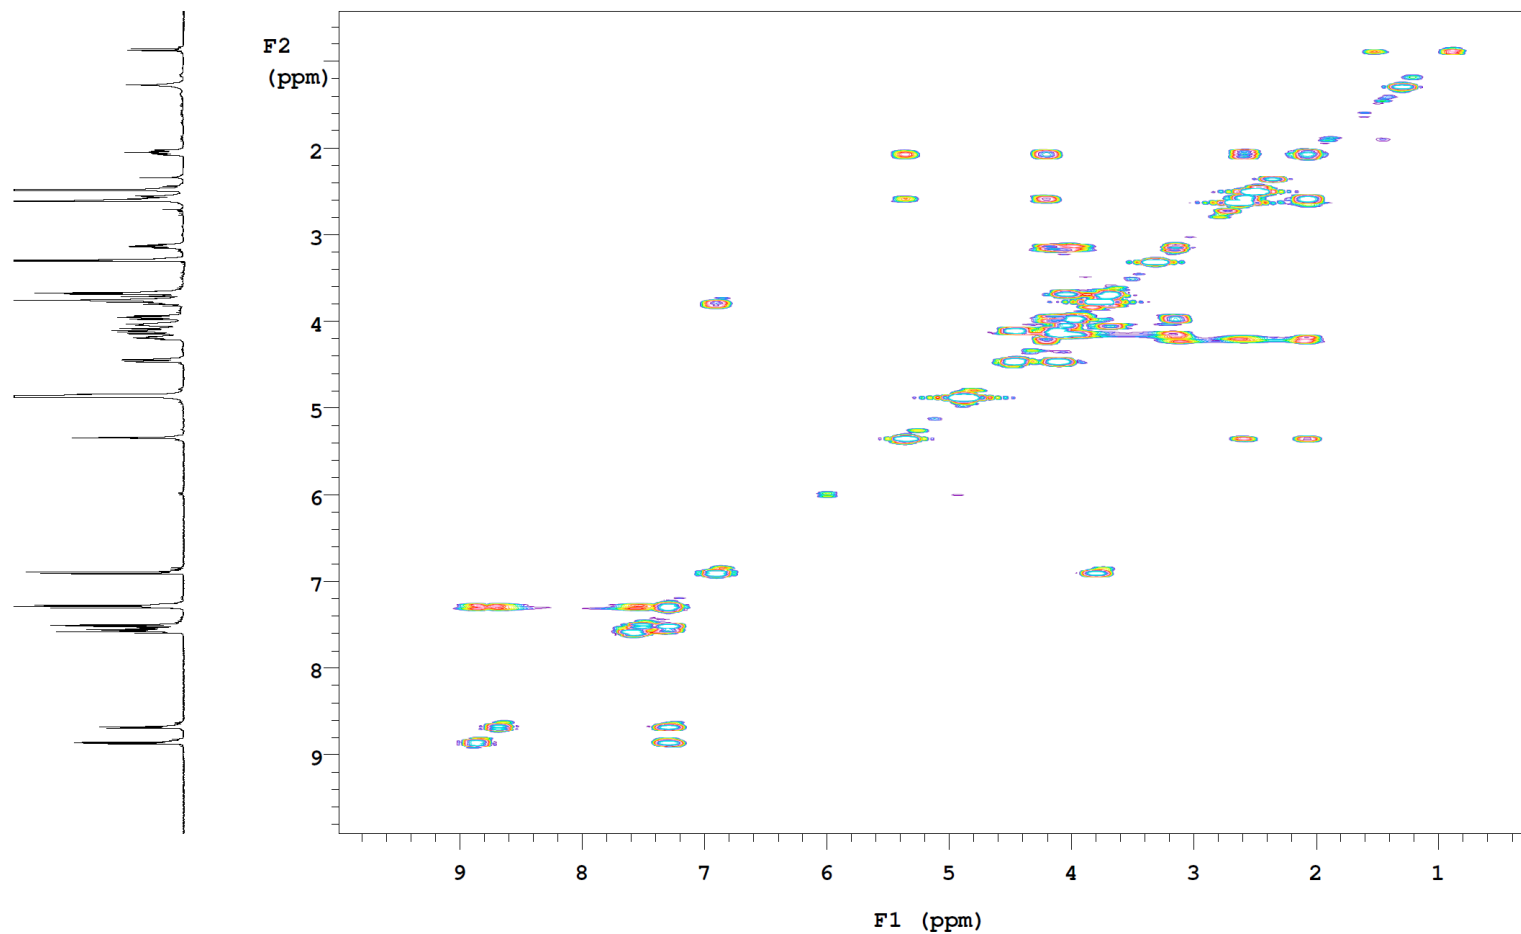

**Figure S57:** <sup>1</sup>H-<sup>1</sup>H COSY spectrum (CD<sub>3</sub>OD, 500 MHz) of AT2433-A1 (**6**)

500 MHz, CD<sub>3</sub>OD, 2 hrs  
Khaled A. Shaaban

Sample: Khaled\_A\_Shaaban  
File: xp

Pulse Sequence: gHSQC

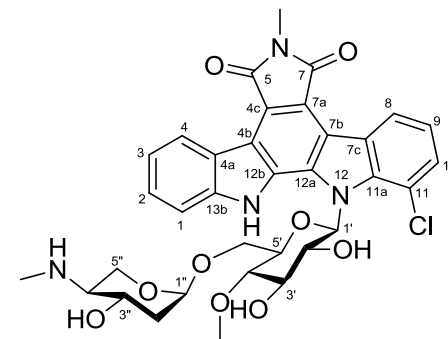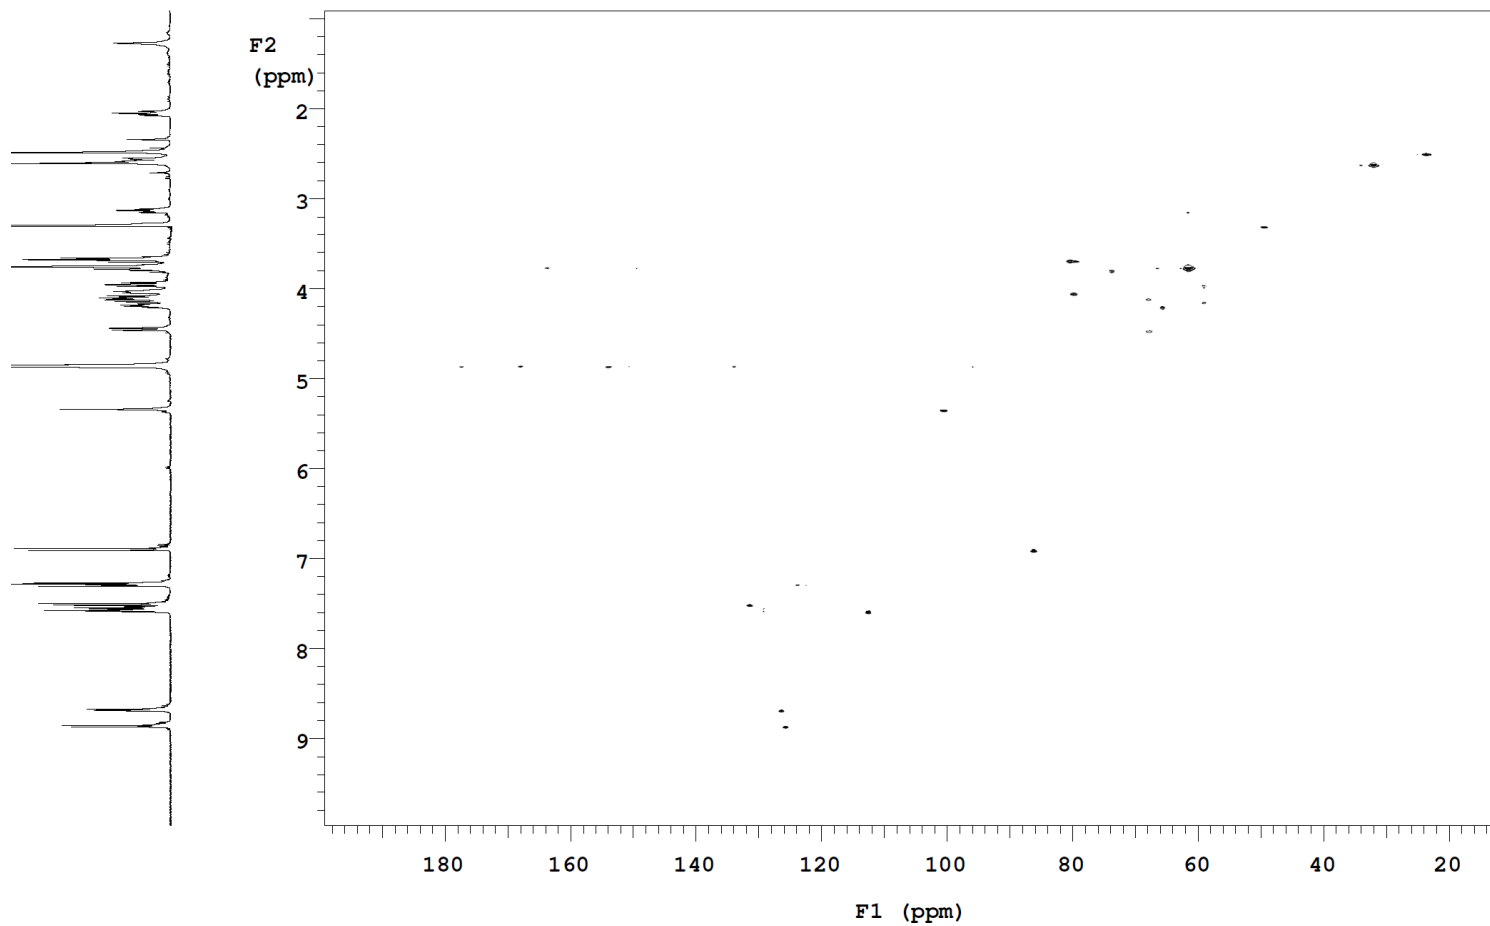

**Figure S58:** HSQC spectrum (CD<sub>3</sub>OD, 500 MHz) of AT2433-A1 (**6**)

500 MHz, CD3OD, 12 hrs  
Khaled A. Shaaban

Sample: Khaled\_A\_Shaaban  
File: xp

Pulse Sequence: gHMBC

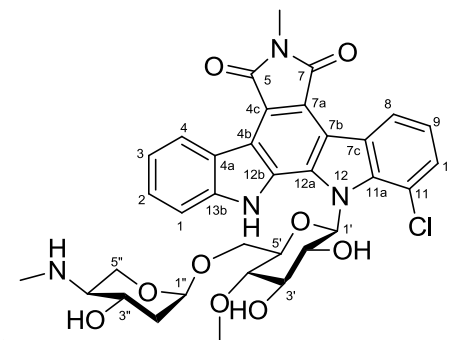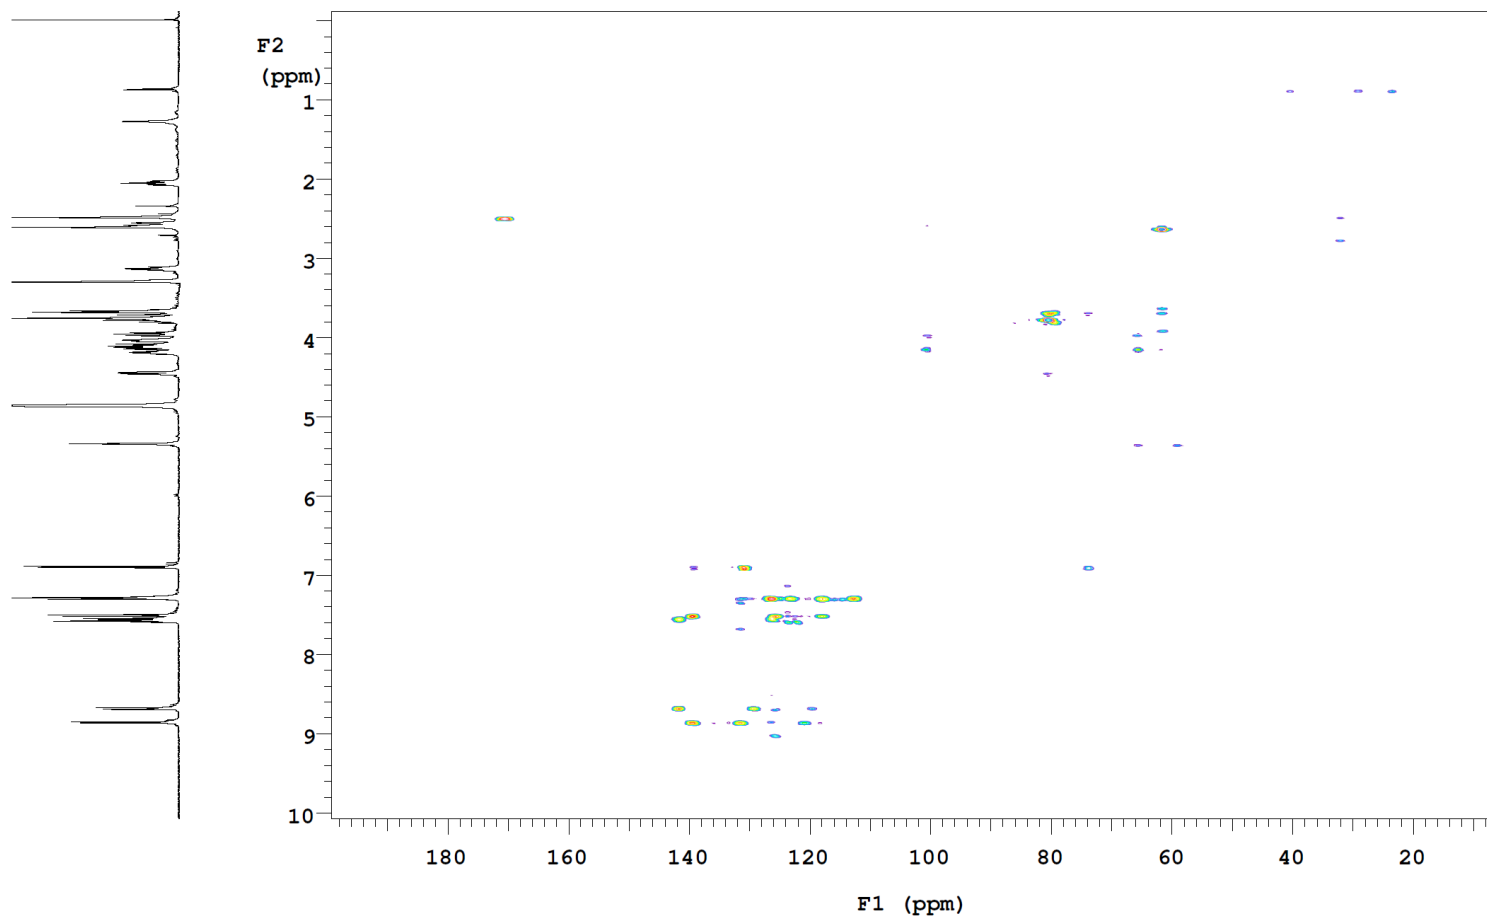

**Figure S59:** HMBC spectrum (CD<sub>3</sub>OD, 500 MHz) of AT2433-A1 (**6**)

500 MHz, CD<sub>3</sub>OD, 5 hrs  
Khaled A. Shaaban

Sample: Khaled\_A\_Shaaban  
File: xp

Pulse Sequence: TOCSY

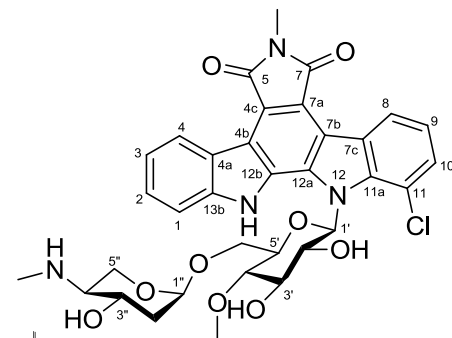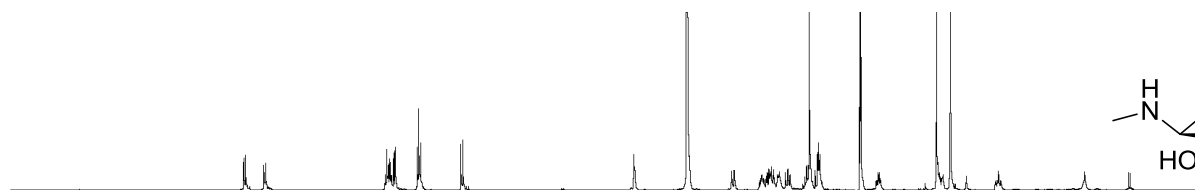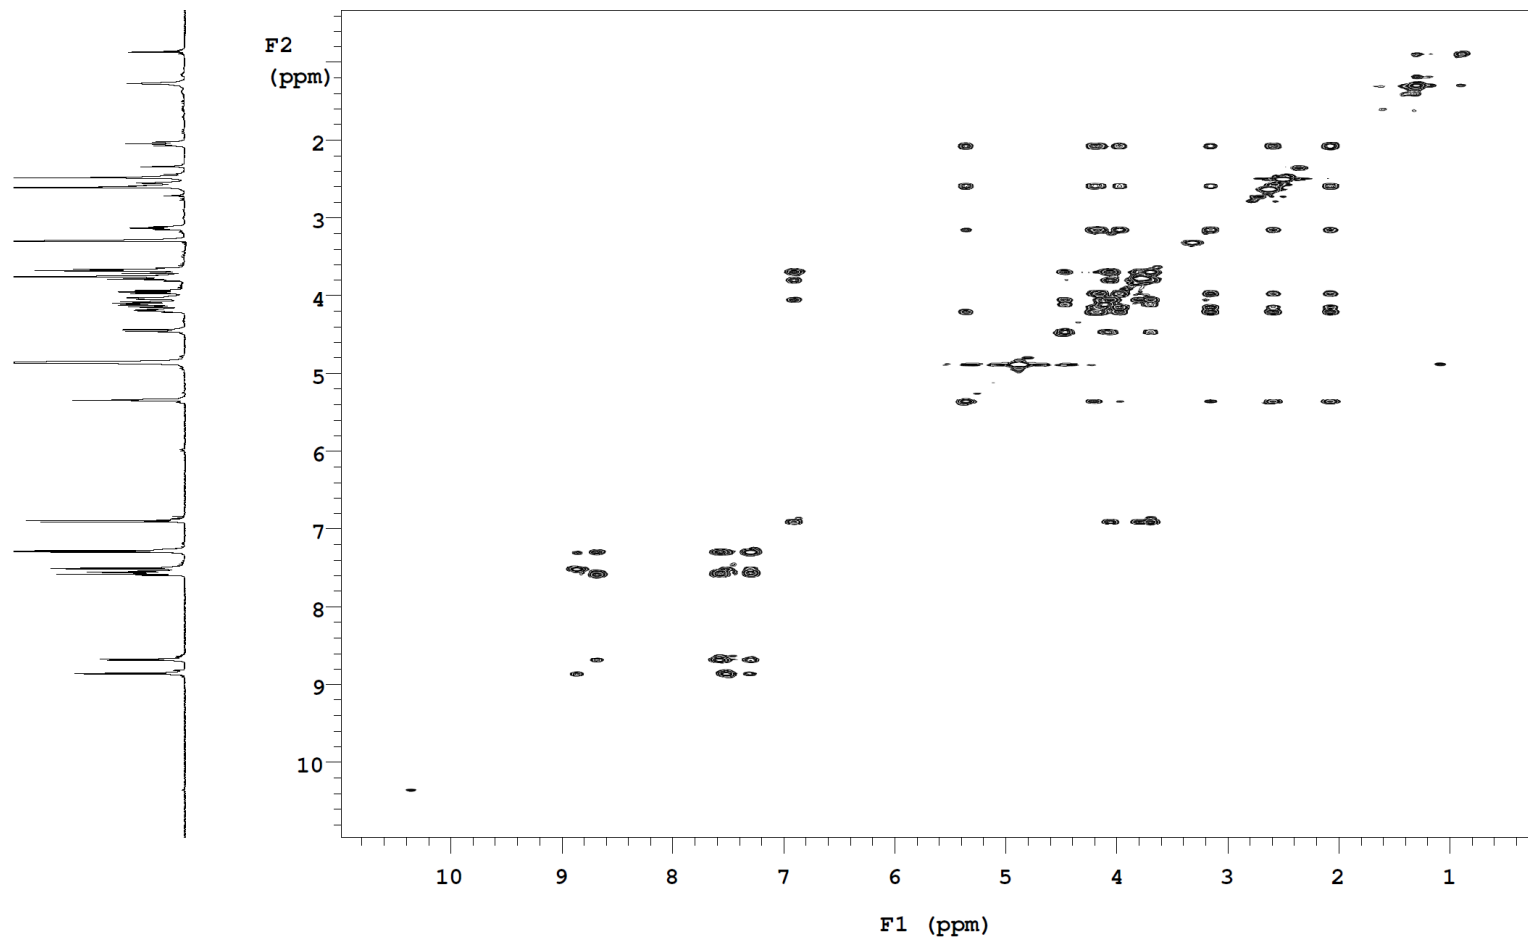

**Figure S60:** TOCSY spectrum (CD<sub>3</sub>OD, 500 MHz) of AT2433-A1 (6)

500 MHz, CD<sub>3</sub>OD, 9 hrs  
Khaled A. Shaaban

Sample: Khaled\_A\_Shaaban  
File: xp

Pulse Sequence: NOESY

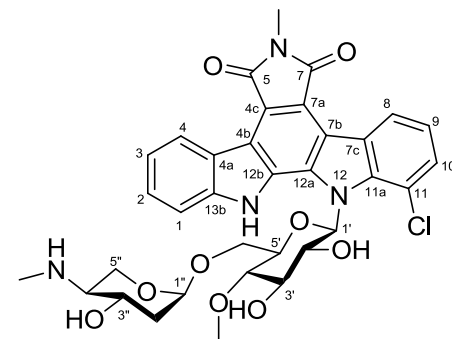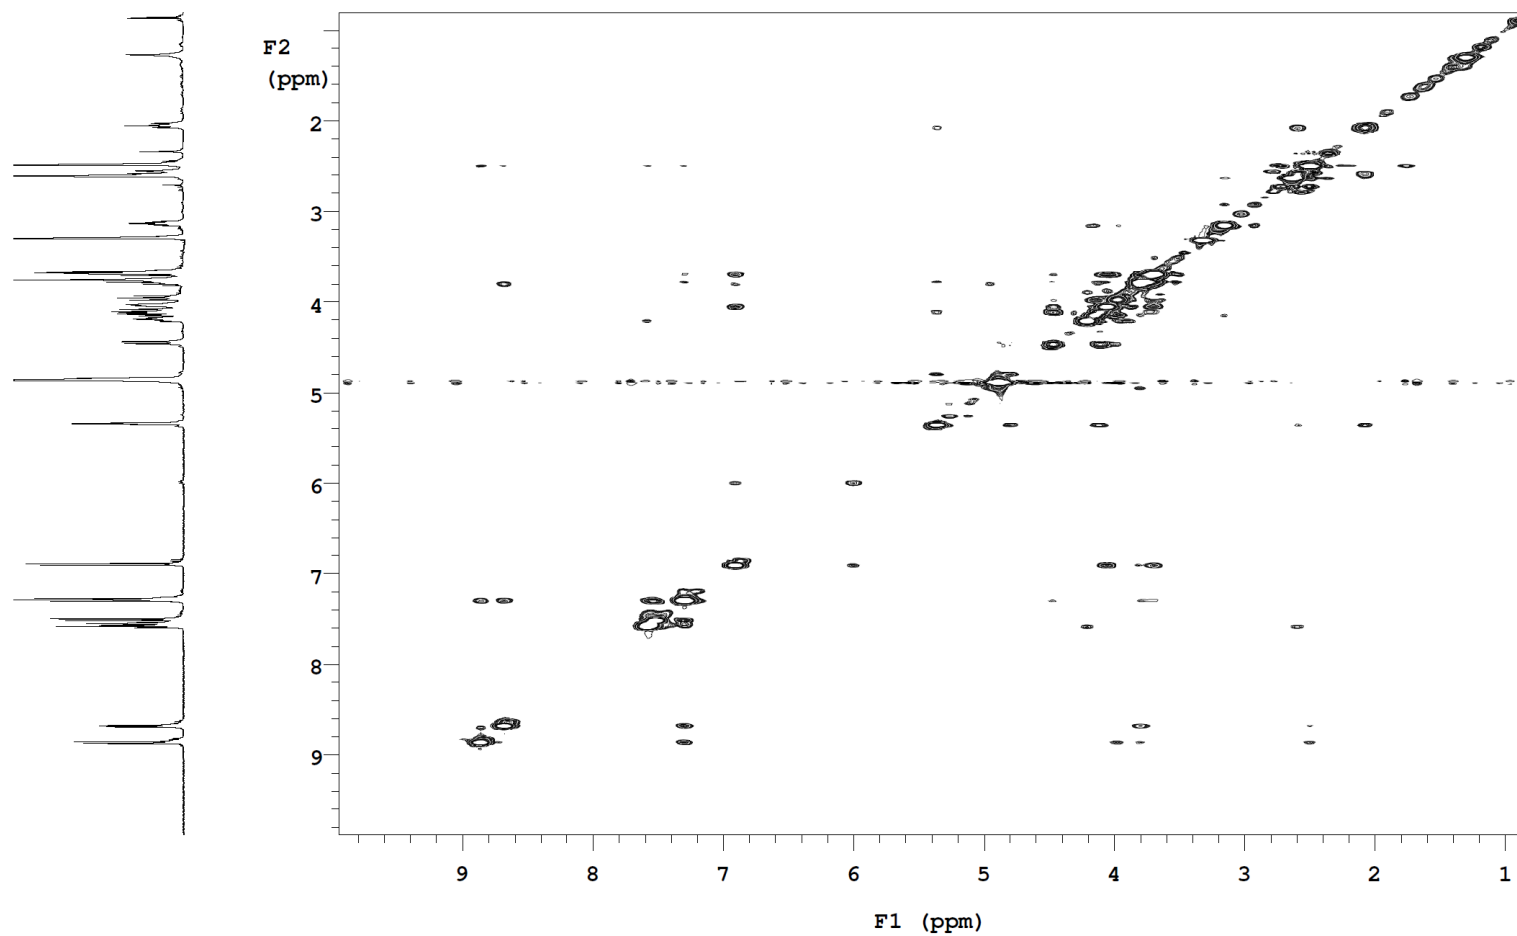

**Figure S61:** NOESY spectrum (CD<sub>3</sub>OD, 500 MHz) of AT2433-A1 (6)

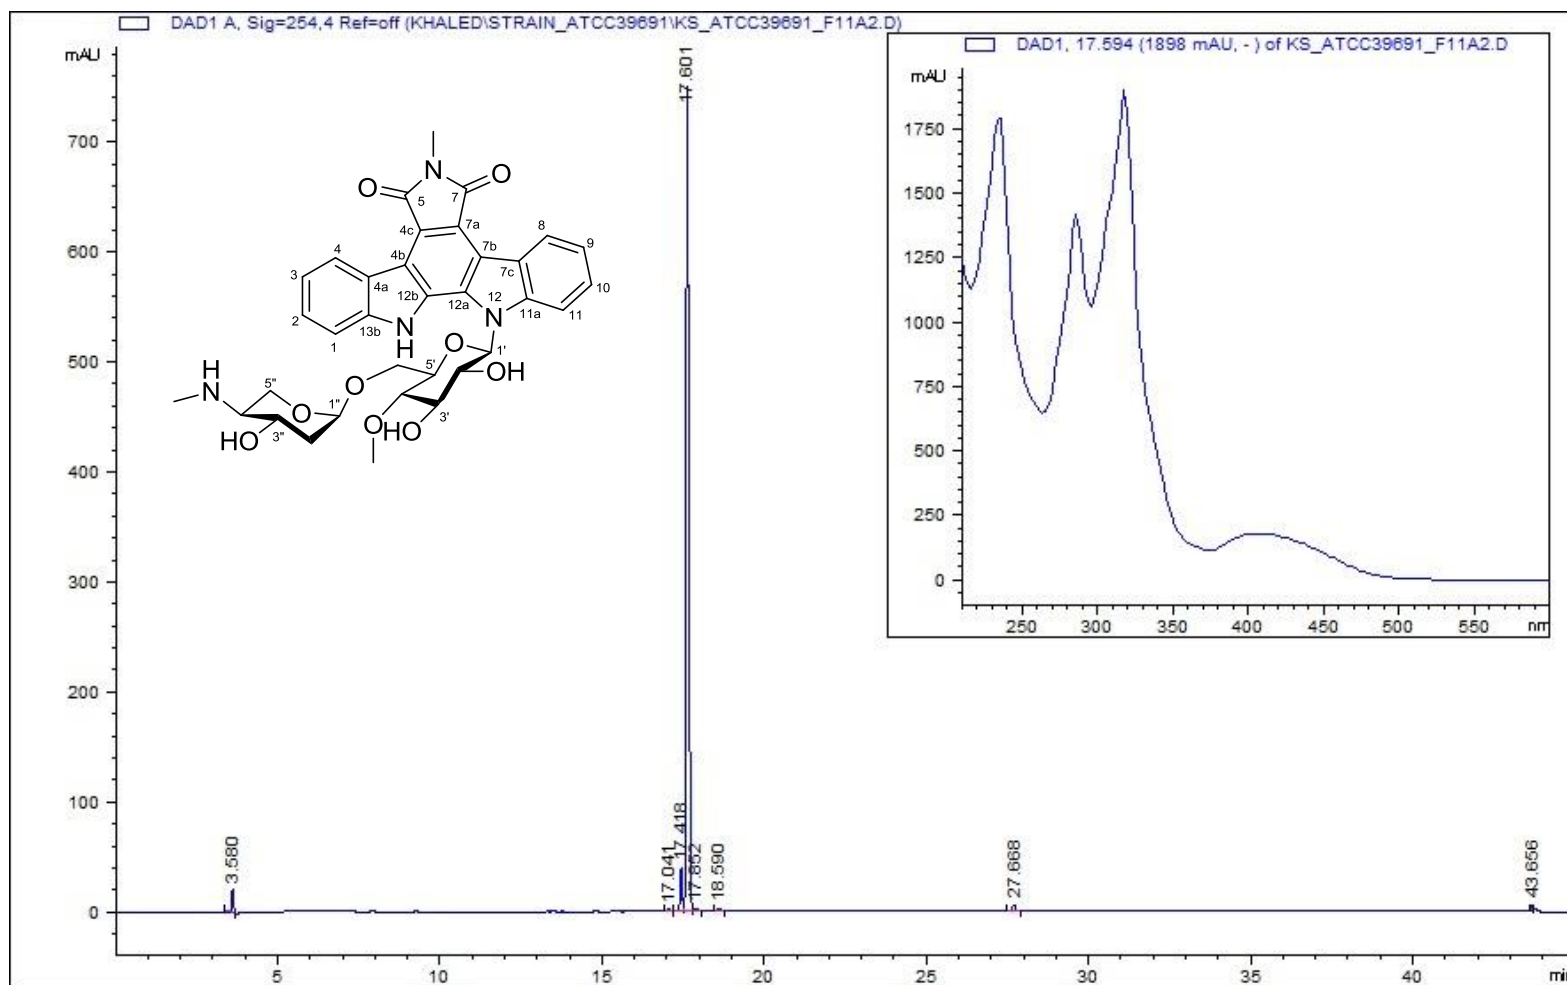

**Figure S62:** HPLC of AT2433-B1 (7). HPLC-conditions: Detection wavelength 254 nm; **solvent A:** H<sub>2</sub>O/0.1% TFA; **solvent B:** CH<sub>3</sub>CN; flow rate: 1.0 mL min<sup>-1</sup>; 0-35 min, 5%-100% B; 35-40 min, 100% B; 40-41 min, 100%-5% B; 41-45 min, 5% B). UV-vis inset of full wavelength 190-600 nm.



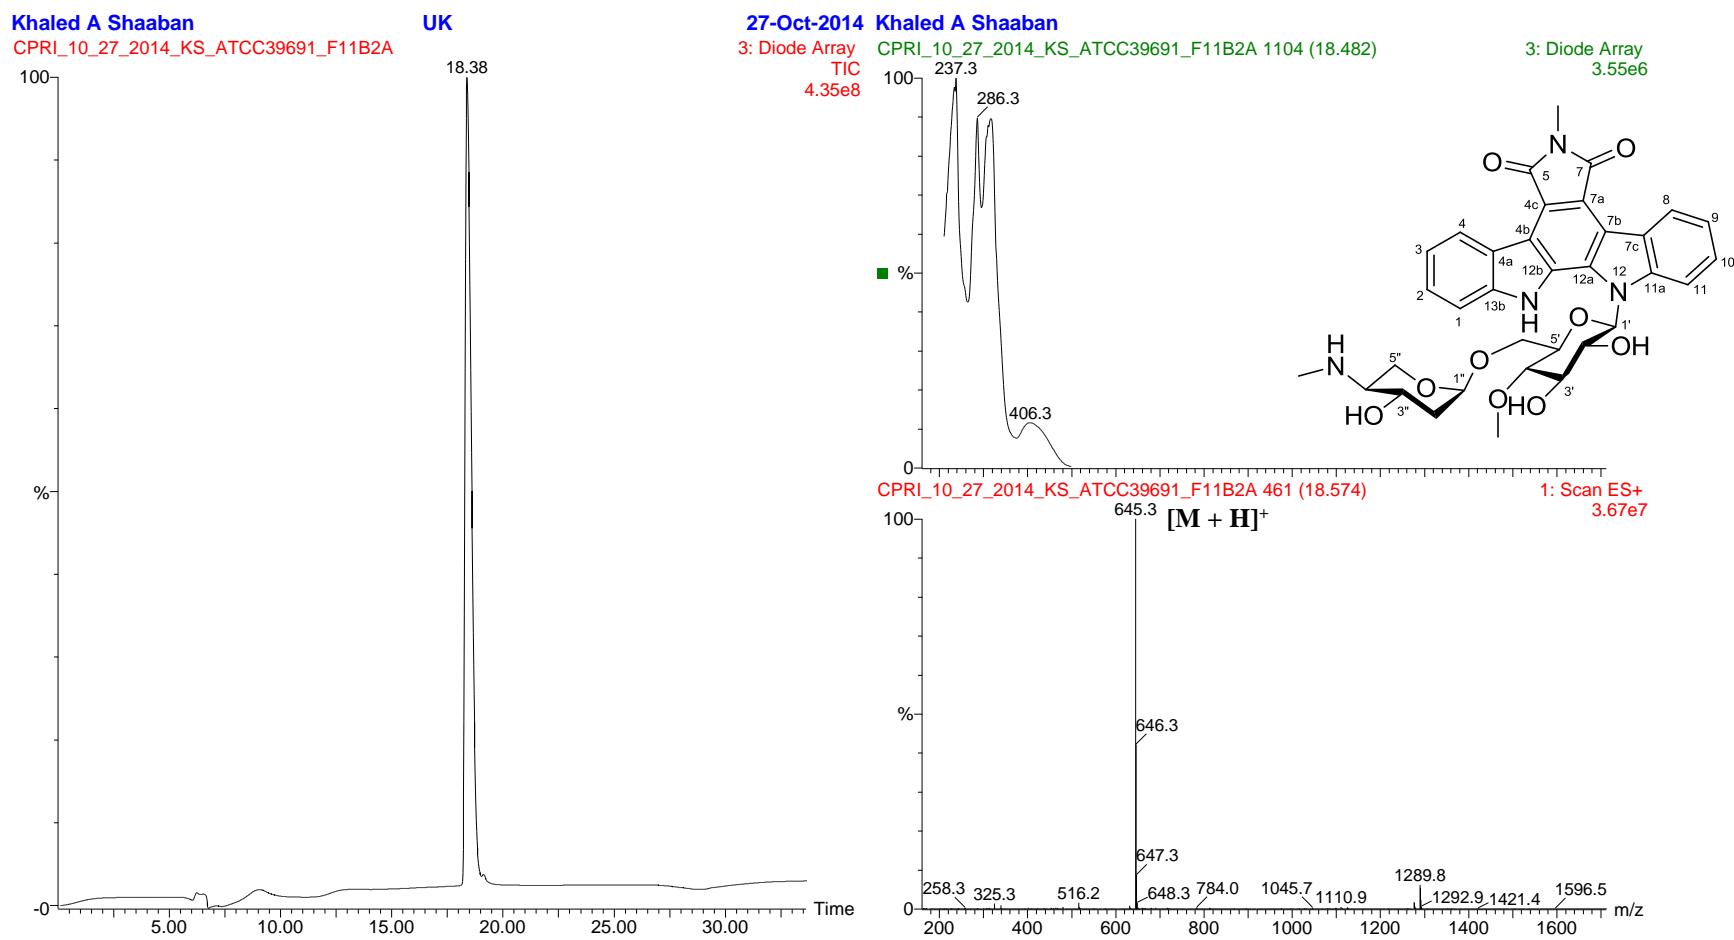

**Figure S63:** HPLC/UV/MS analyses of AT2433-B1 (**7**). Detection wavelength: 210-500; **solvent A:** H<sub>2</sub>O/0.1% Formic acid; **solvent B:** CH<sub>3</sub>CN/0.1% Formic acid; flow rate: 0.5 mL min<sup>-1</sup>; 0-4 min, 10% B; 4-22 min, 10-100% B; 22-27 min, 100% B; 27-29 min, 100%-10% B; 29-35 min, 10% B.

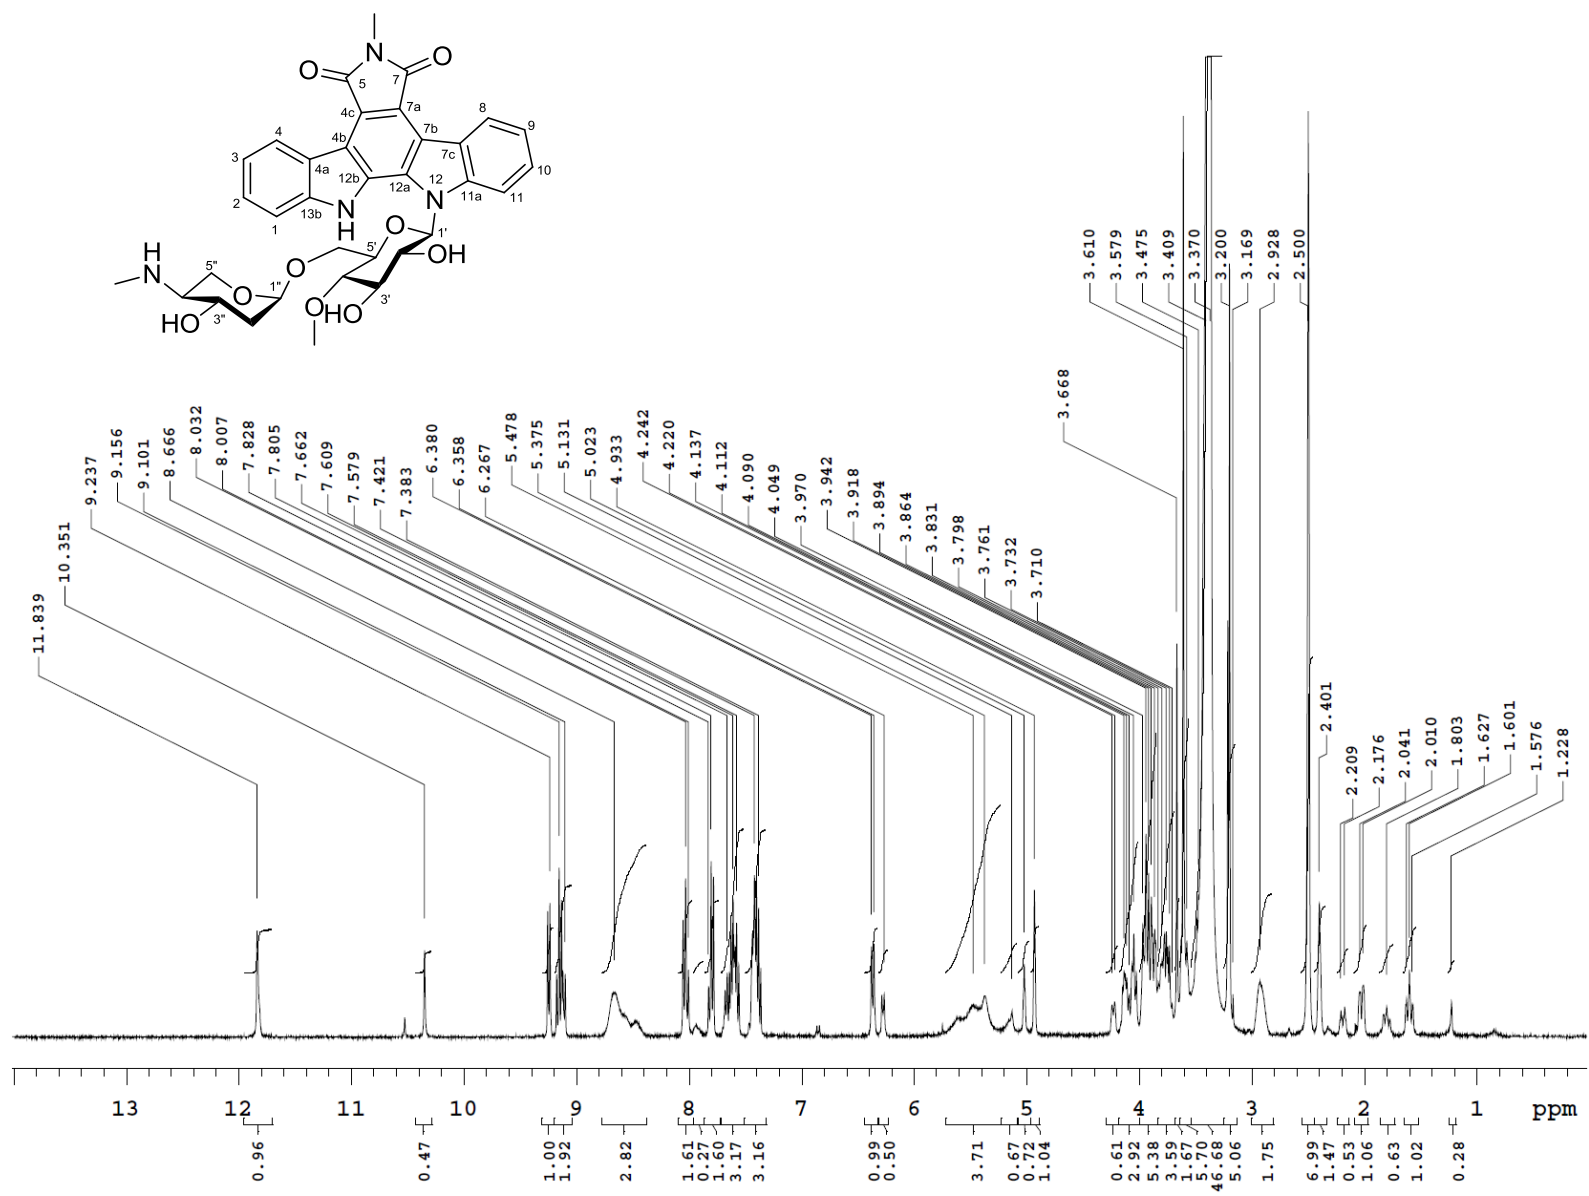

**Figure S64:** <sup>1</sup>H NMR spectrum (DMSO-d<sub>6</sub>, 400 MHz) of AT2433-B1 (7)

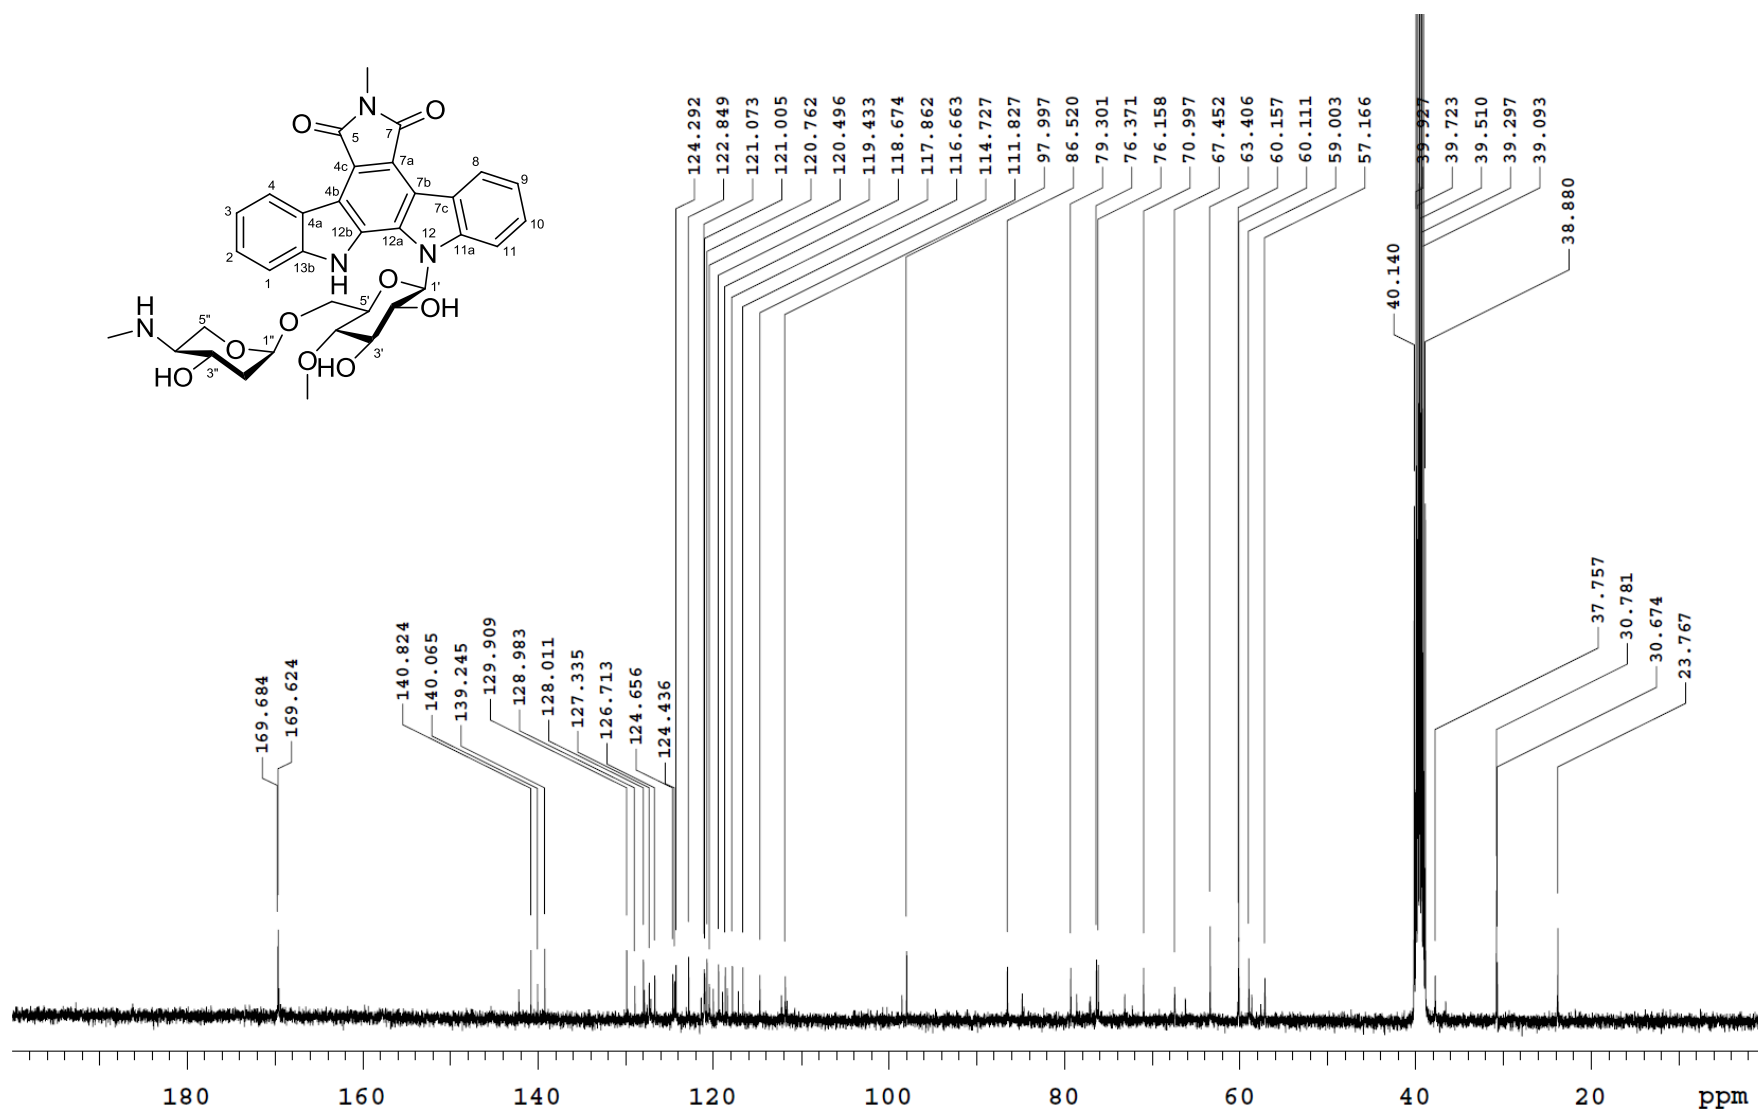

**Figure S65:** <sup>13</sup>C NMR spectrum (DMSO-*d*<sub>6</sub>, 100 MHz) of AT2433-B1 (7)

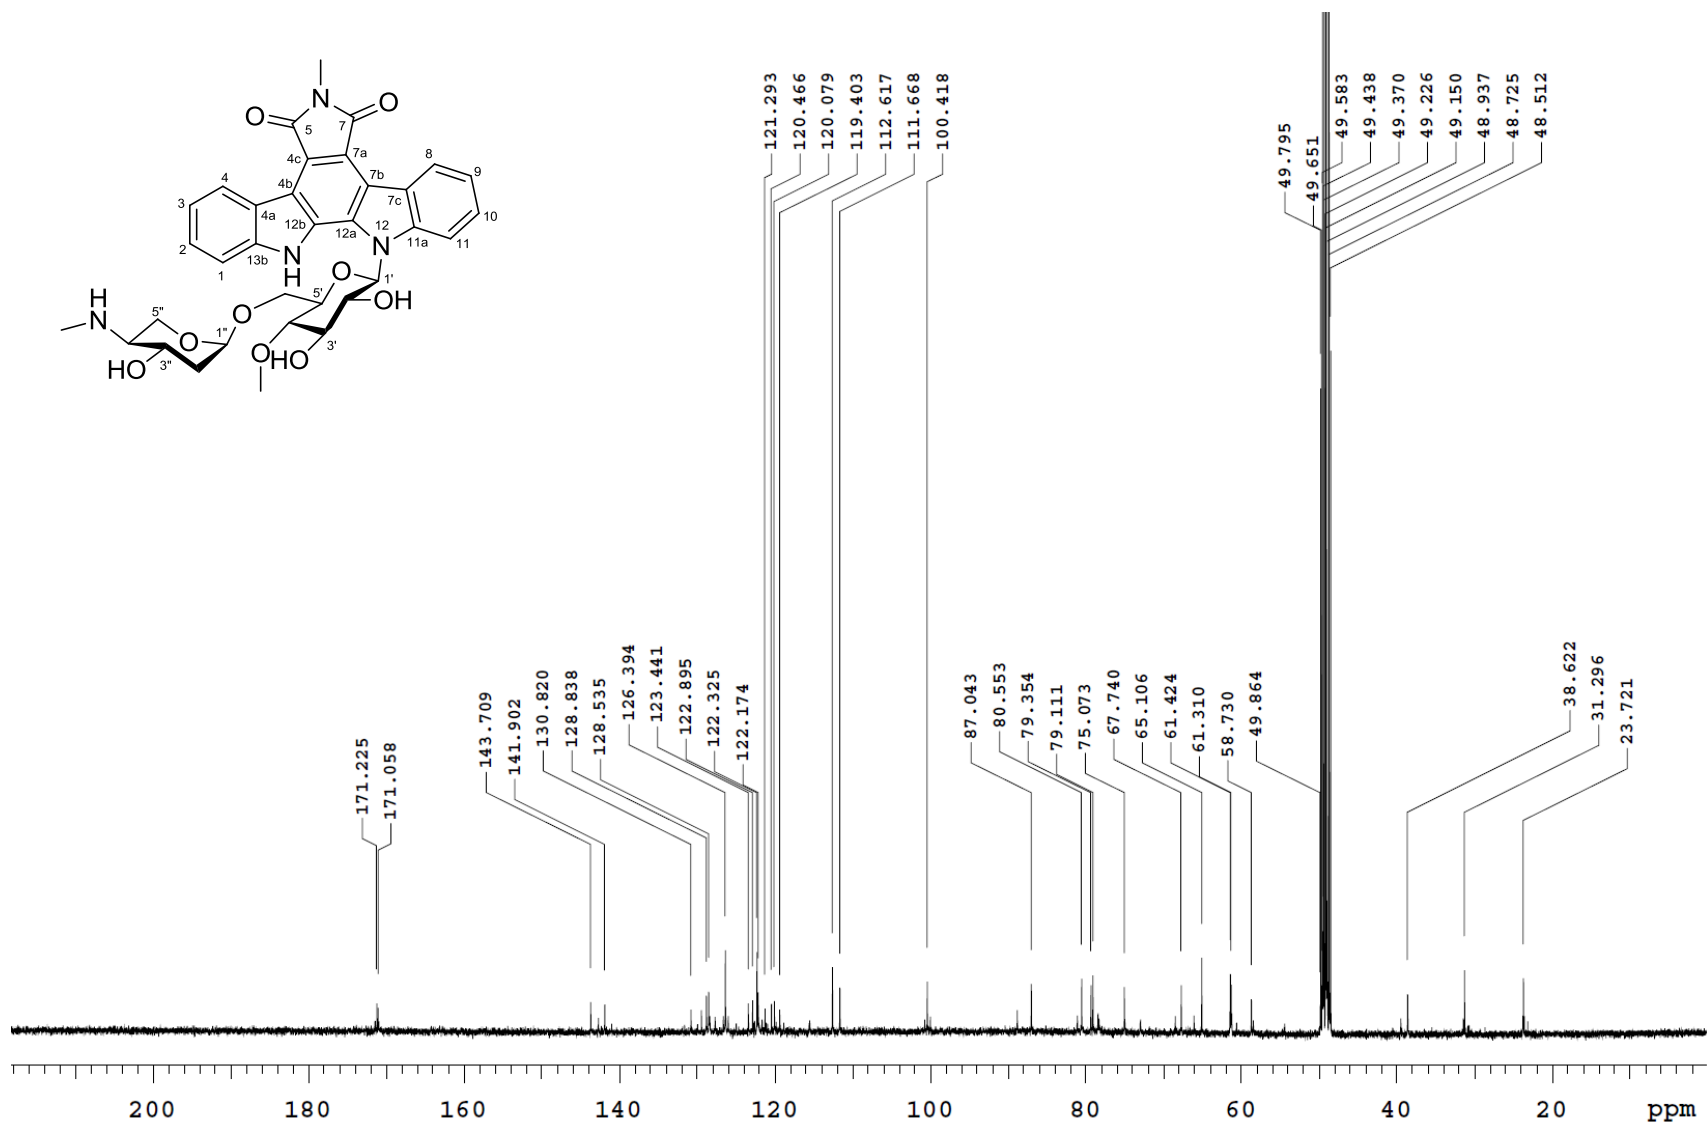

**Figure S66:** <sup>13</sup>C NMR spectrum (CD<sub>3</sub>OD, 100 MHz) of AT2433-B1 (7)

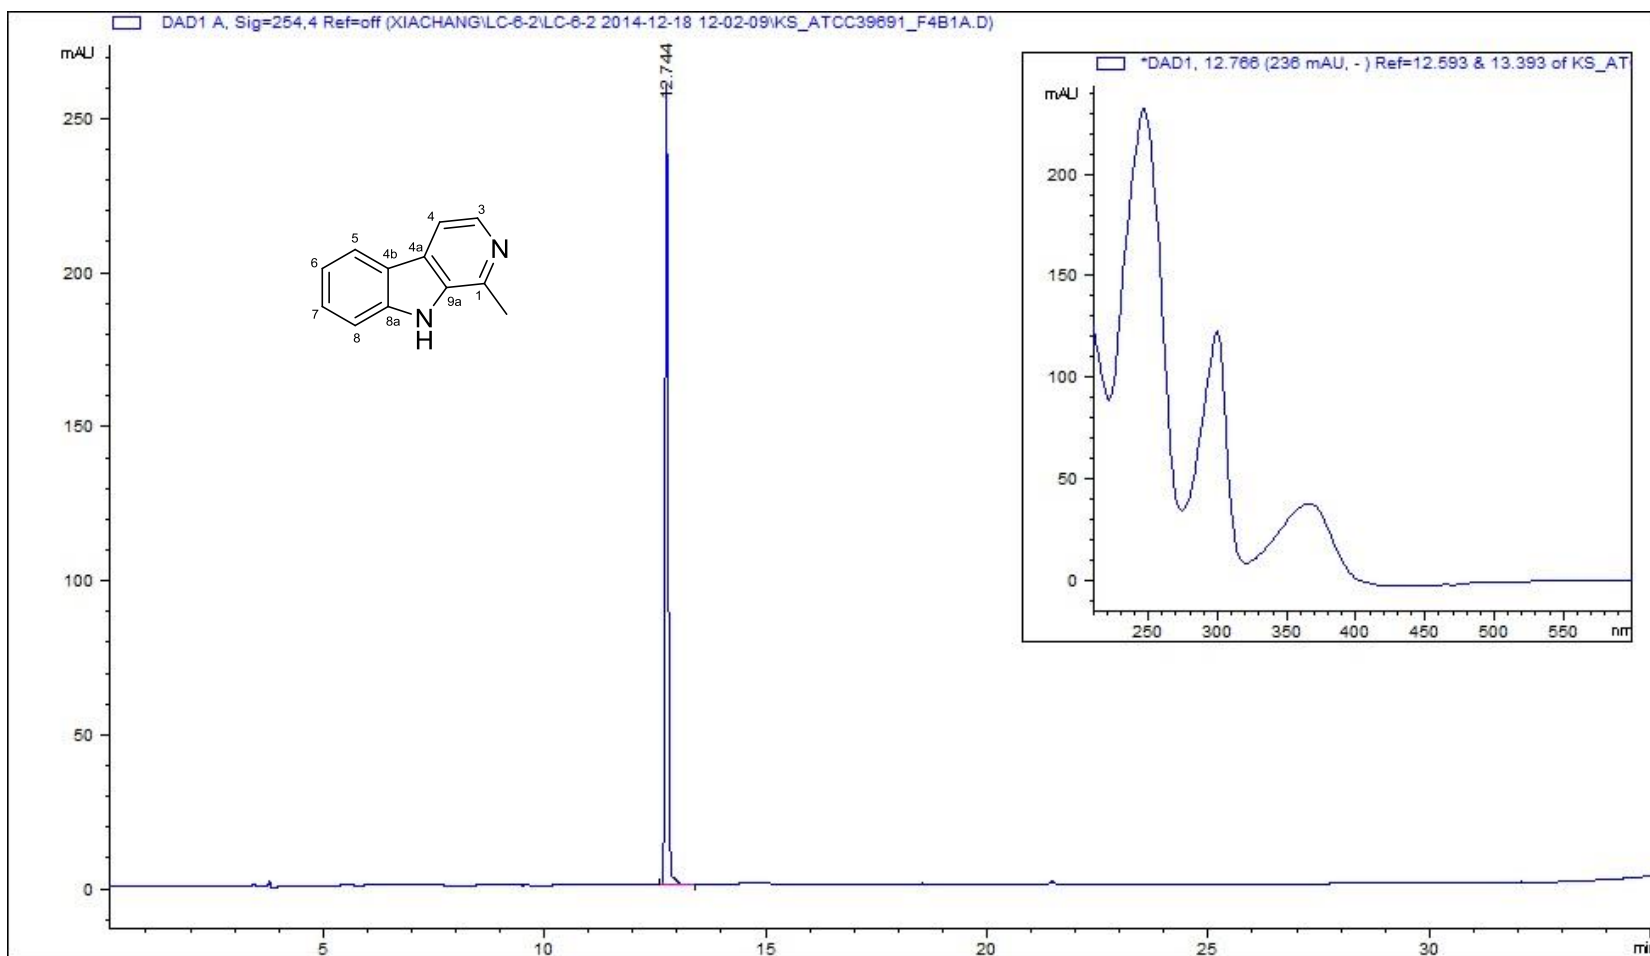

**Figure S67:** HPLC of harman “1-methyl- $\beta$ -carboline” (**12**). HPLC-conditions: Detection wavelength 254 nm; **solvent A:** H<sub>2</sub>O/0.1% TFA; **solvent B:** CH<sub>3</sub>CN; flow rate: 0.5 mL min<sup>-1</sup>; 0-4 min, 10% B; 4-22 min, 10-100% B; 22-27 min, 100% B; 27-29 min, 100%-10% B; 29-35 min, 10% B. UV-vis inset of full wavelength 190-600 nm.

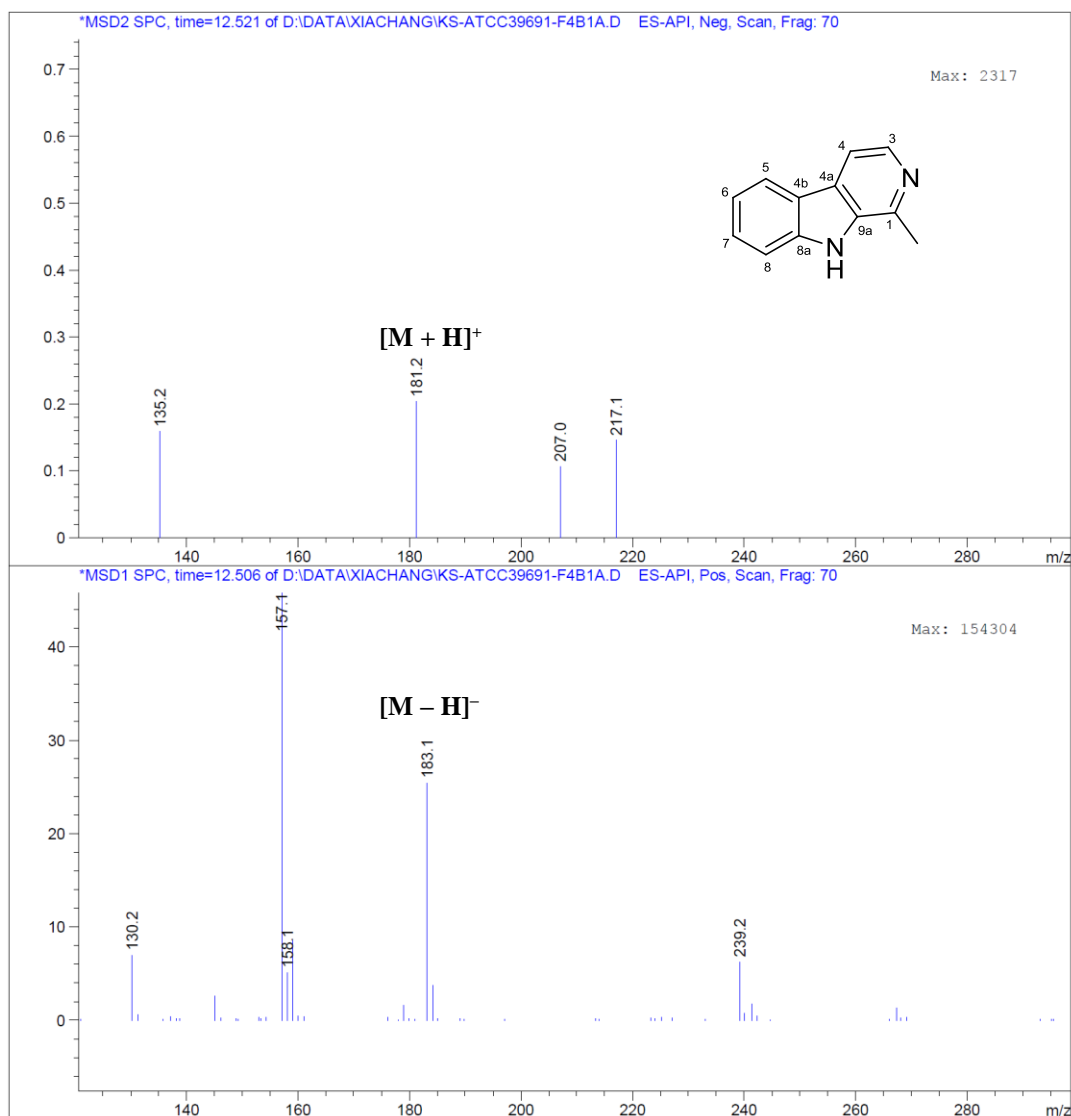

**Figure S68:** (+) and (-)-APCI-MS spectra of harman "1-methyl- $\beta$ -carboline" (**12**)

14-0616 #55-81 RT: 1.44-2.12 AV: 27 NL: 2.46E8  
T: FTMS + p ESI Full lock ms [100.00-1000.00]

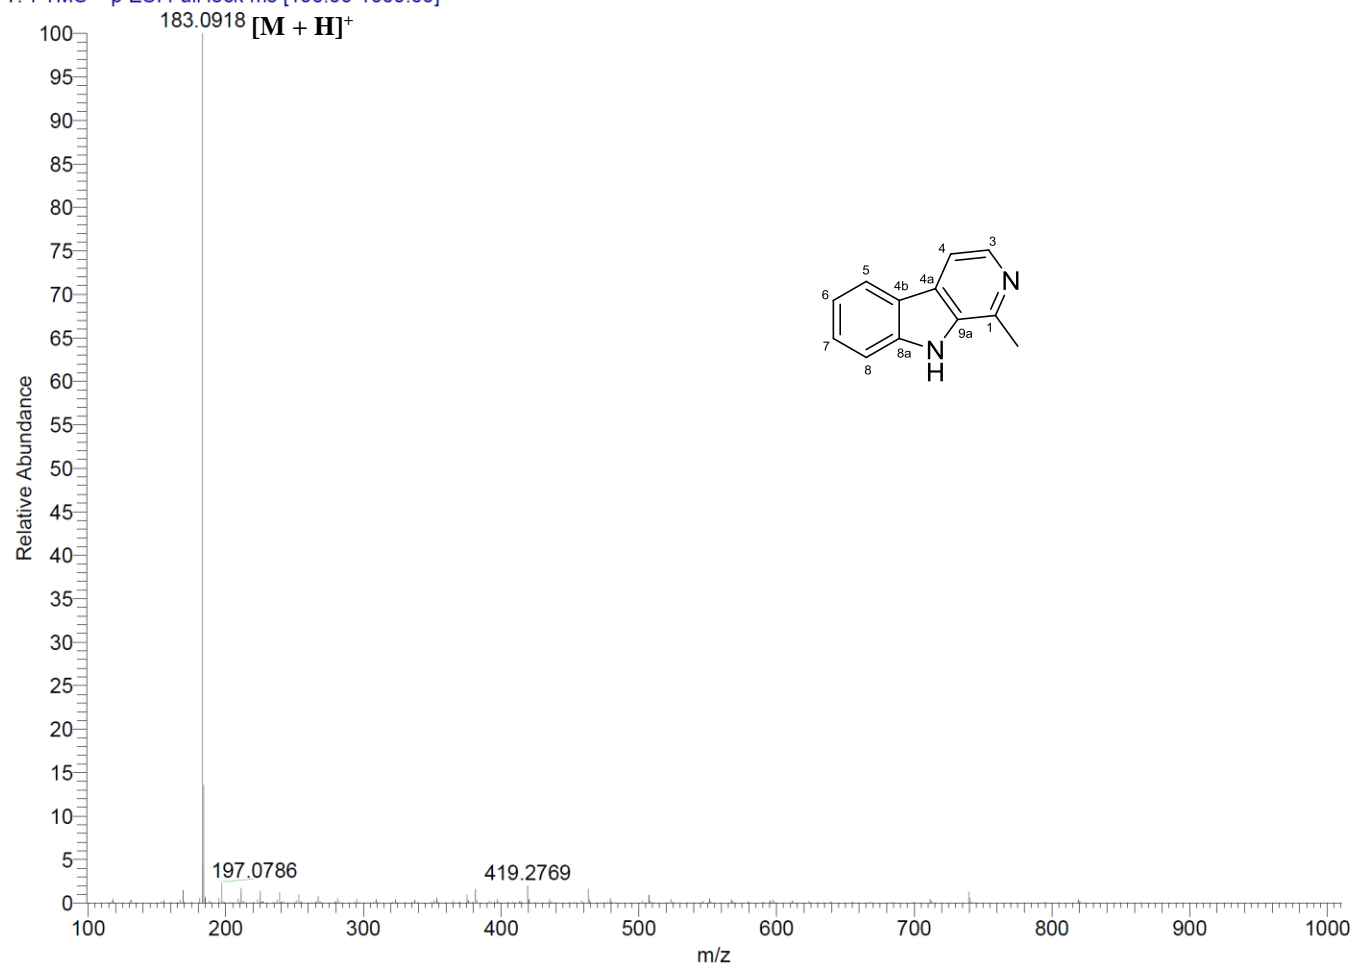

**Figure S69:** (+)-HRESI-MS spectrum of harman “1-methyl-β-carboline” (12)

500 MHz, DMSO-d<sub>6</sub>, nt=256  
Khaled A. Shaaban

Sample: khaled\_A\_Shaaban  
File: xp

Pulse Sequence: s2pul

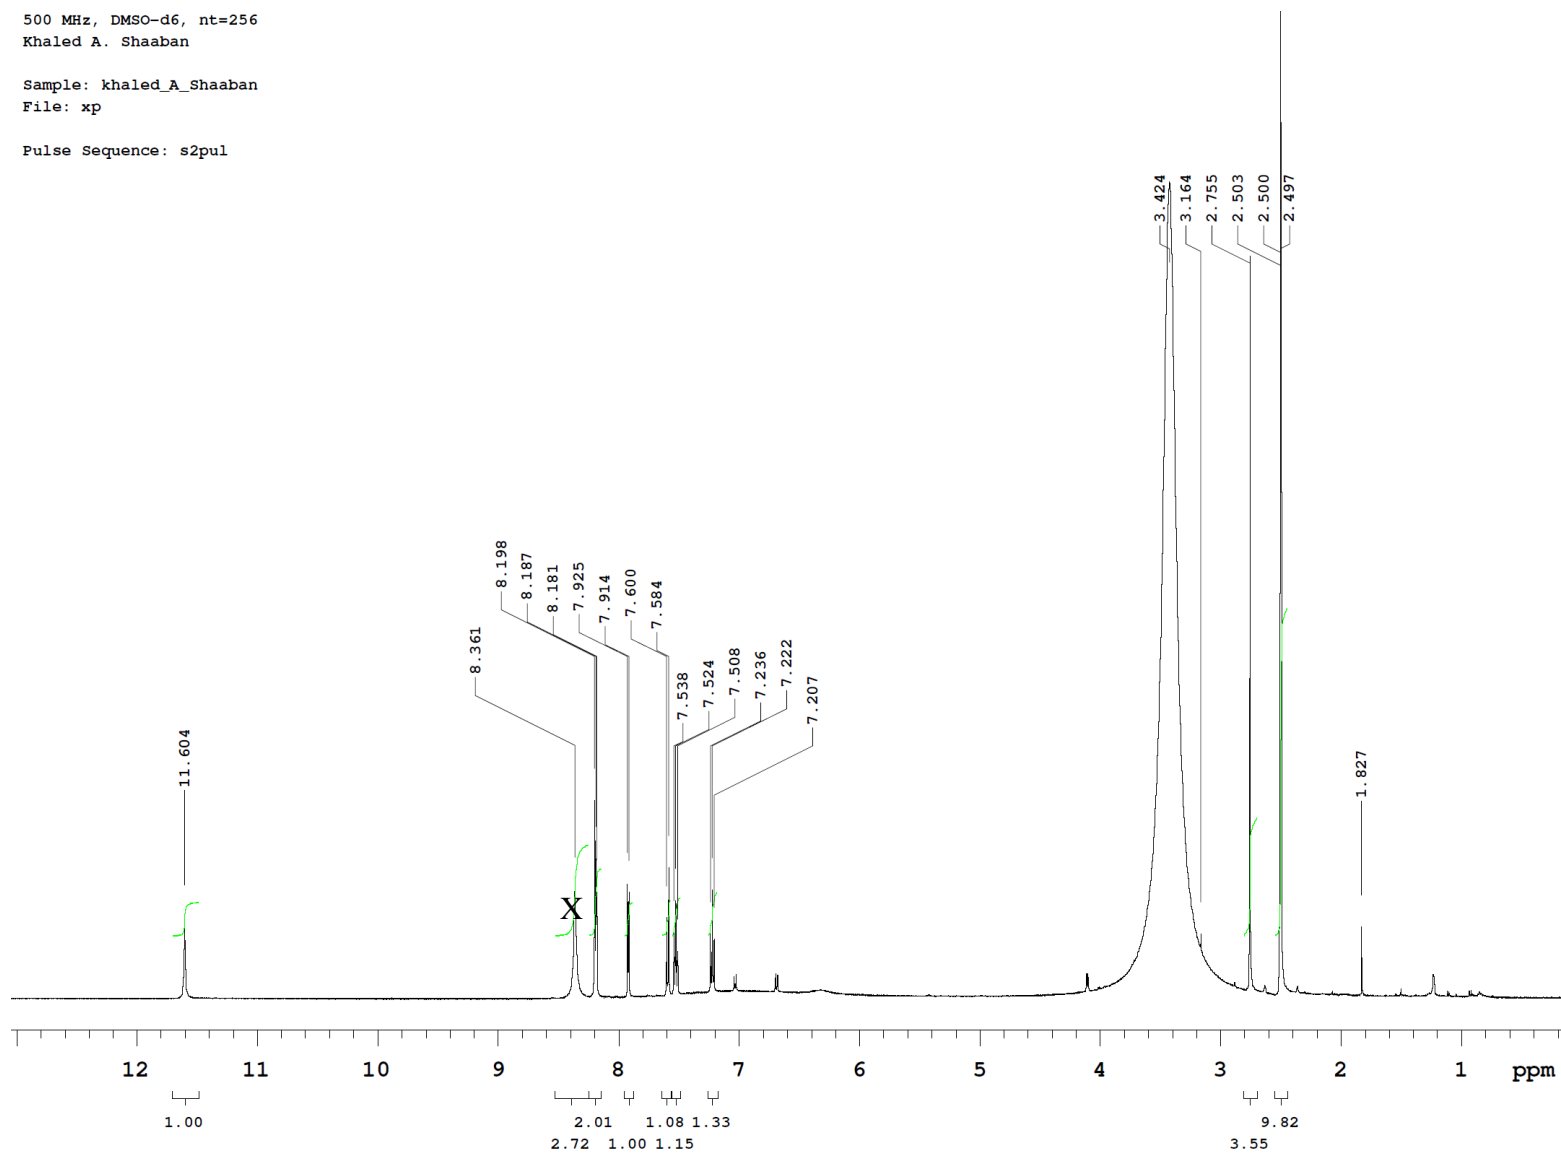

**Figure S70:** <sup>1</sup>H NMR spectrum (DMSO-d<sub>6</sub>, 500 MHz) of harman "1-methyl-β-carboline" (12)



125 MHz, DMSO-d<sub>6</sub>, 40 hrs  
Khaled A. Shaaban

Sample: khaled\_A\_Shaaban  
File: xp

Pulse Sequence: s2pul

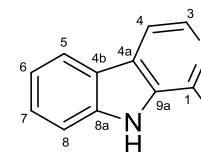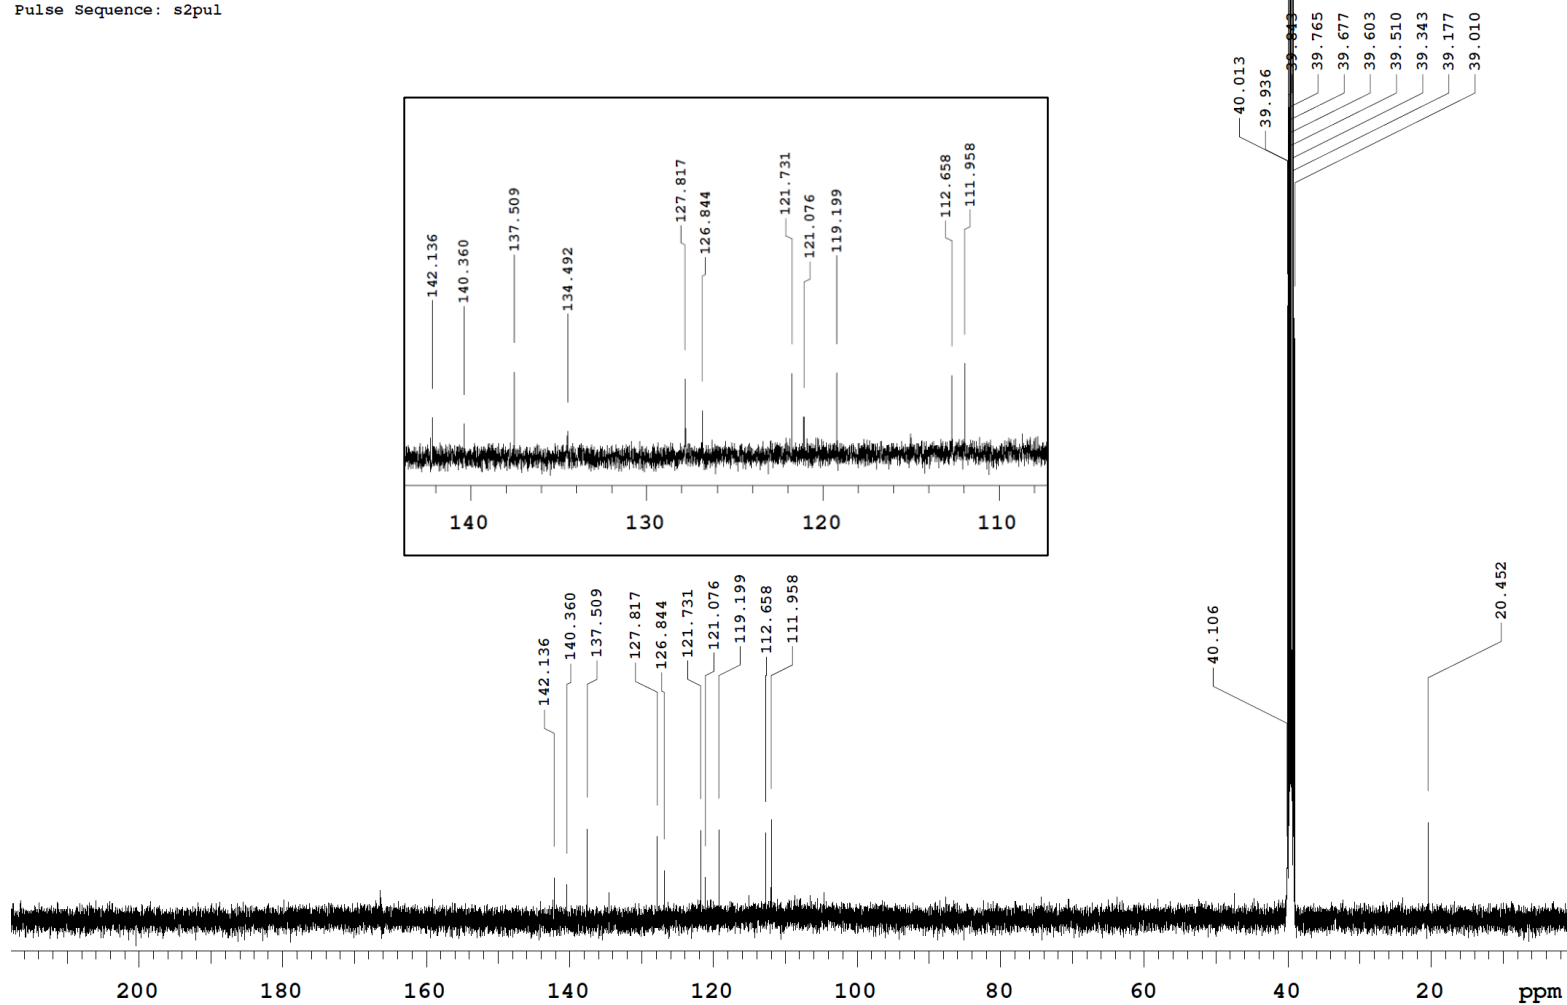

**Figure S71:**  $^{13}\text{C}$  NMR spectrum (DMSO- $d_6$ , 125 MHz) of harman “1-methyl- $\beta$ -carboline” (12)

500 MHz, DMSO-d<sub>6</sub>, 2 hrs  
Khaled A. Shaaban

Sample: khaled\_A\_Shaaban  
File: xp

Pulse Sequence: gCOSY

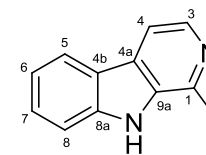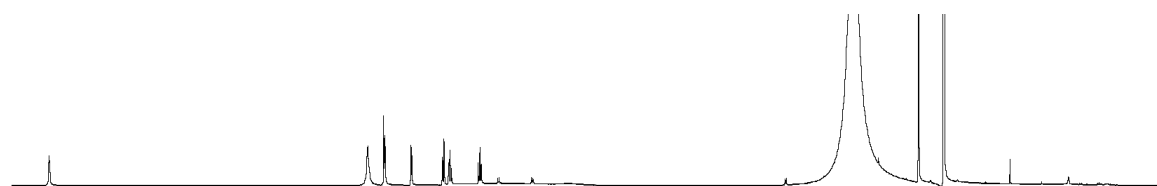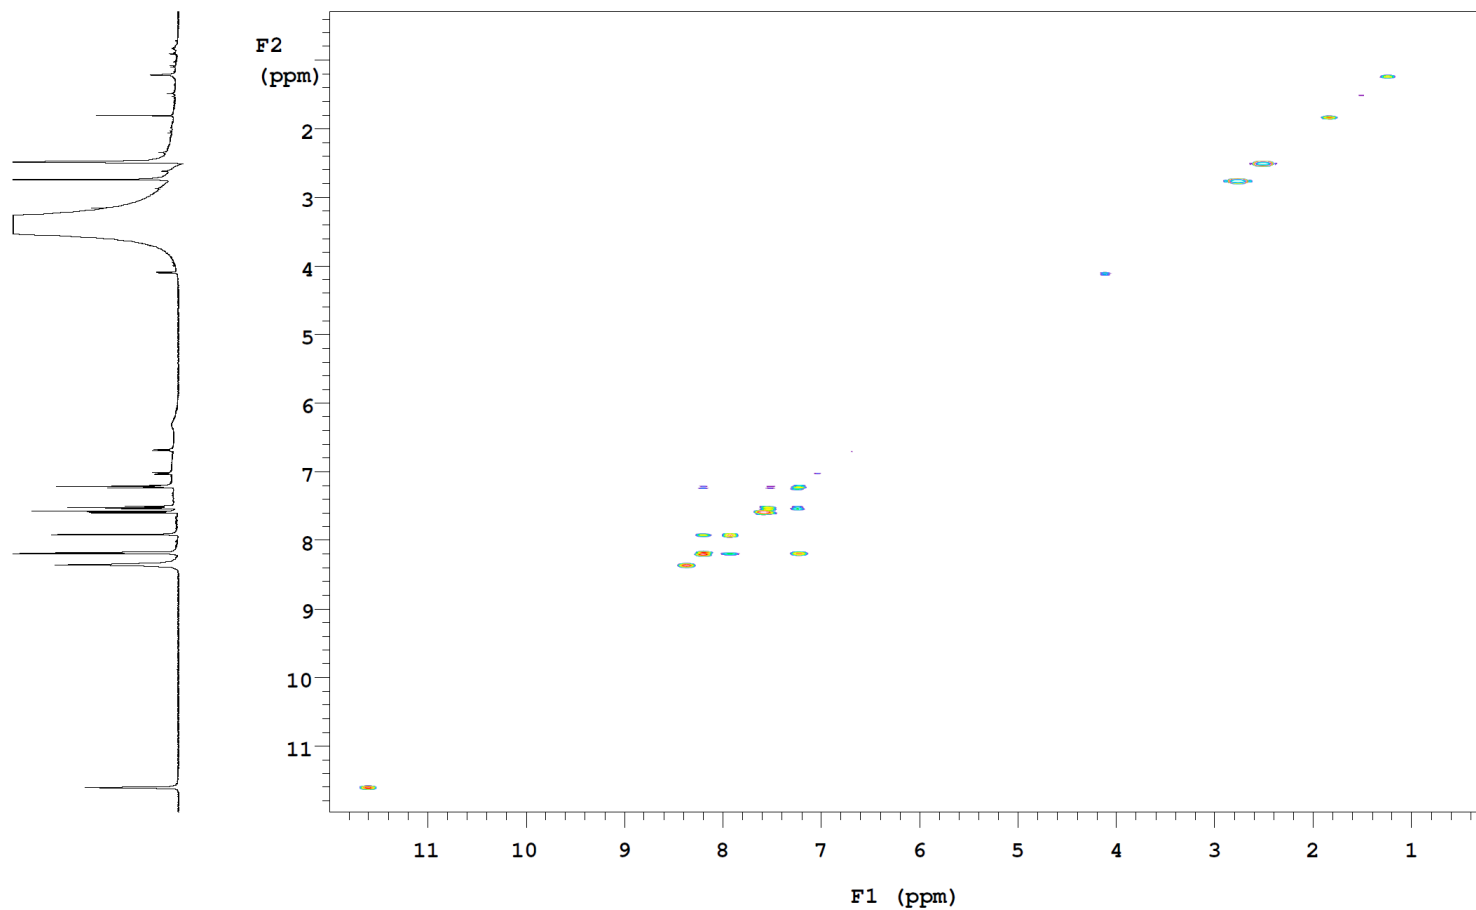

**Figure S72:** <sup>1</sup>H-<sup>1</sup>H COSY spectrum (DMSO-*d*<sub>6</sub>, 500 MHz) of harman “1-methyl-β-carboline” (**12**)

Sample: khaled\_A\_Shaaban  
File: xp  
Pulse Sequence: gHSQC

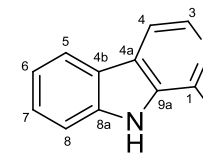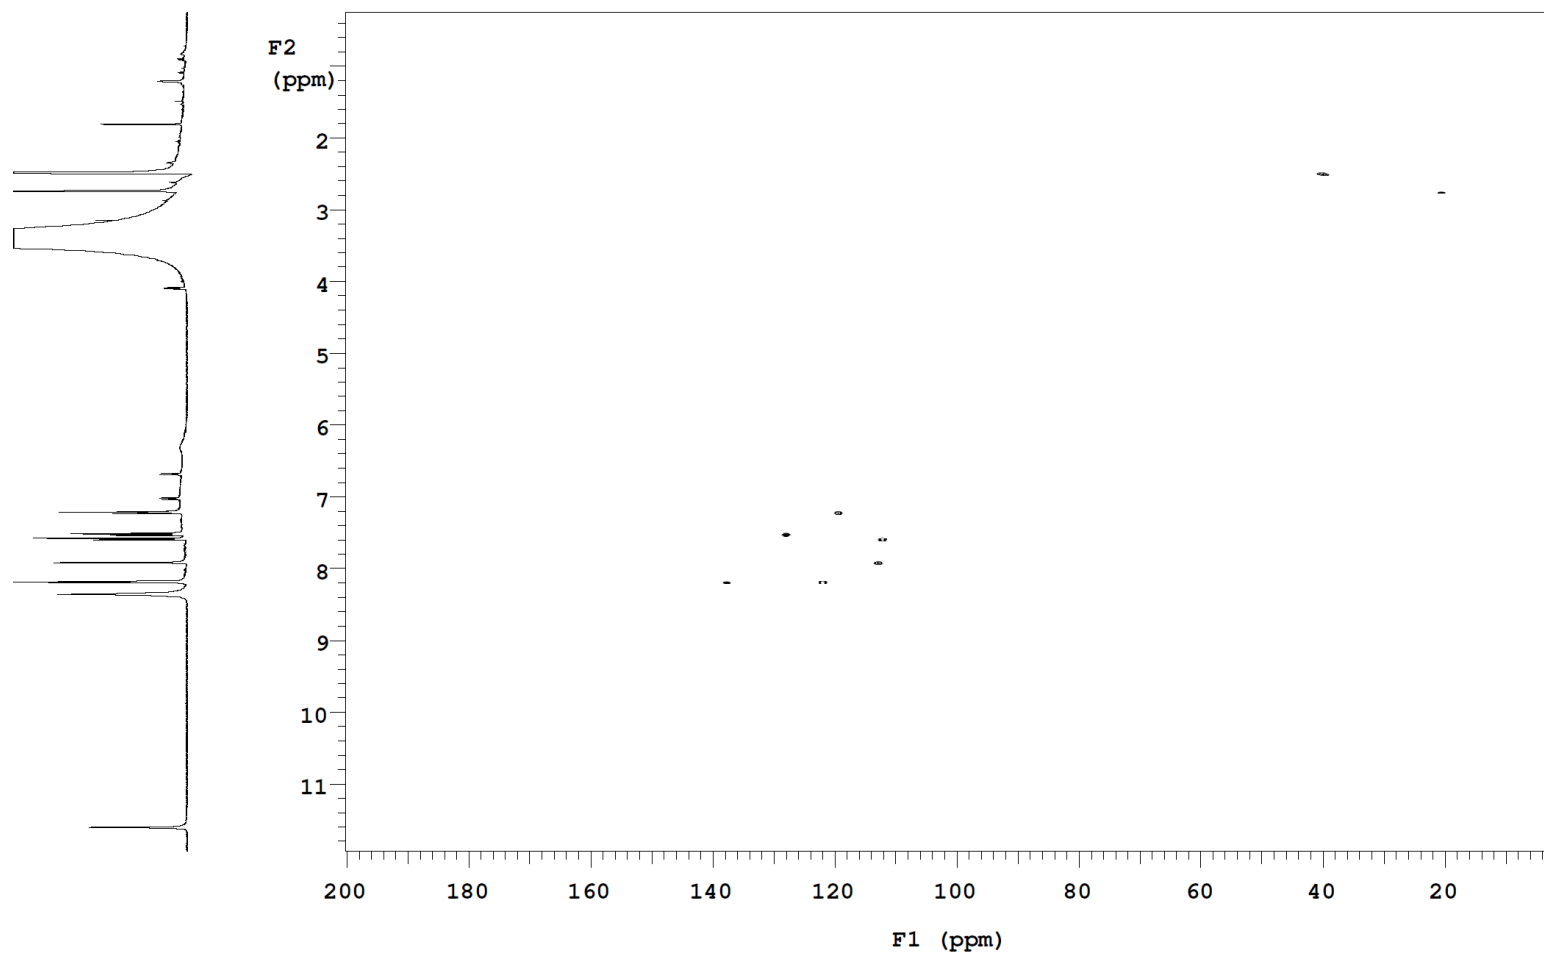

**Figure S73:** HSQC spectrum (DMSO-*d*<sub>6</sub>, 500 MHz) of harman “1-methyl- $\beta$ -carboline” (**12**)

KS\_ATCC39691\_F4B1A\_gHMBC\_12\_23\_2014  
500 MHz, DMSO-d<sub>6</sub>, 22 hrs  
Khaled A. Shaaban

Sample: khaled\_A\_Shaaban  
File: xp

Pulse Sequence: gHMBC

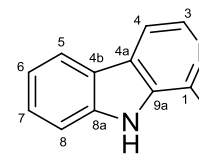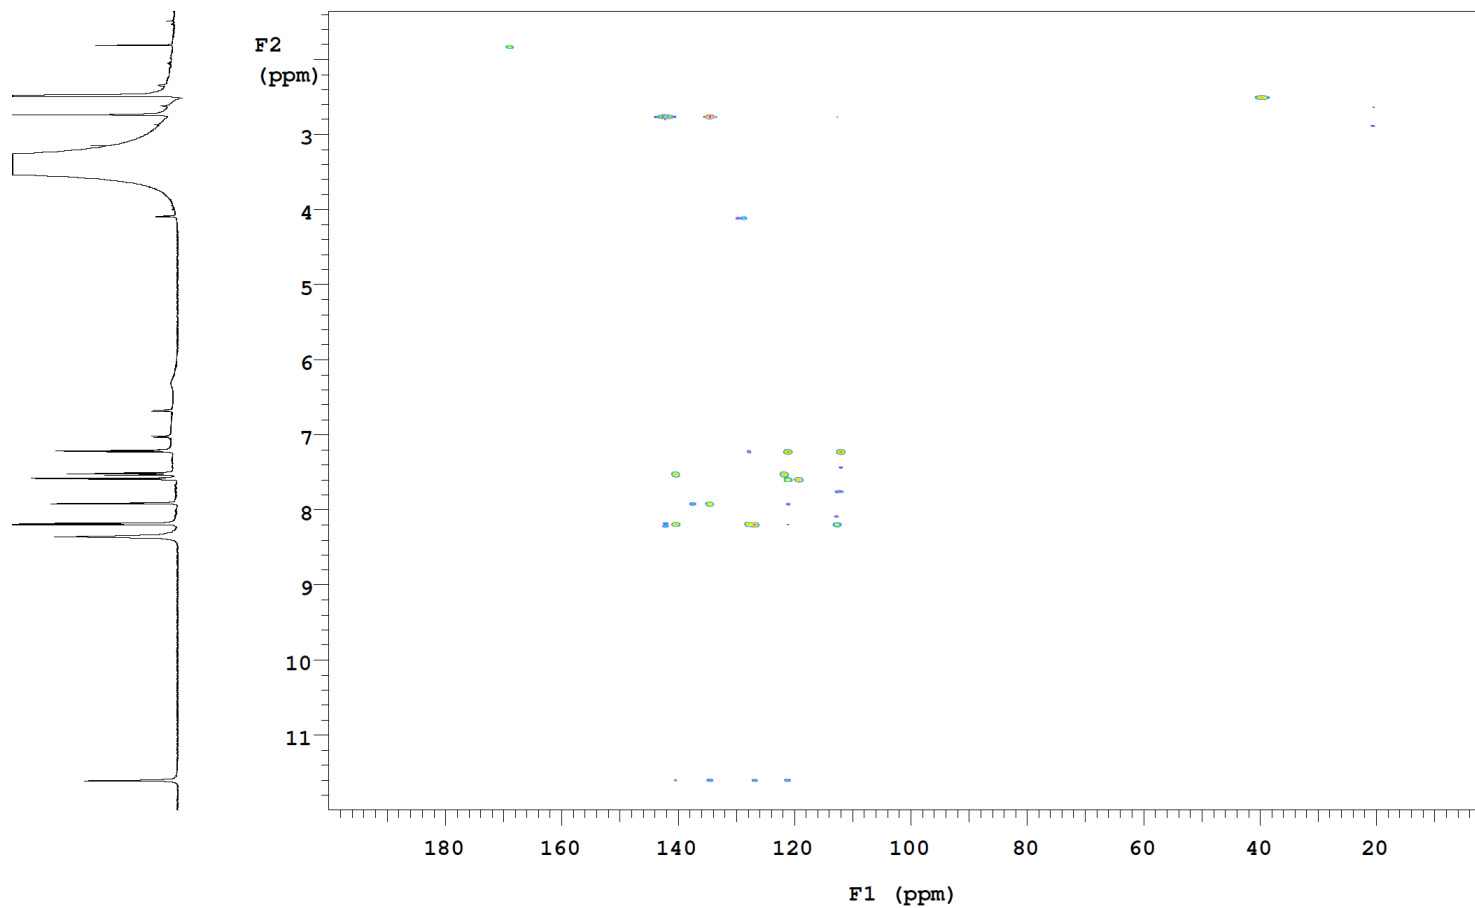

**Figure S74:** HMBC spectrum (DMSO-*d*<sub>6</sub>, 500 MHz) of harman “1-methyl- $\beta$ -carboline” (**12**)

KS\_ATCC39691\_F4B1A\_TOCSY\_12\_26\_2014  
500 MHz, DMSO-d6, 5 hrs  
Khaled A. Shaaban

Sample: khaled\_A\_Shaaban  
File: xp

Pulse Sequence: TOCSY

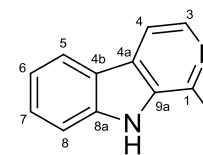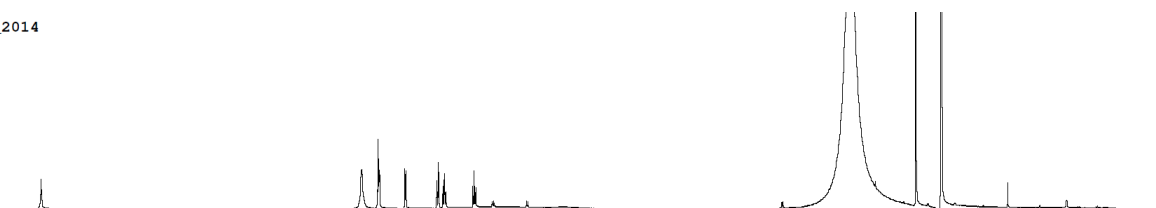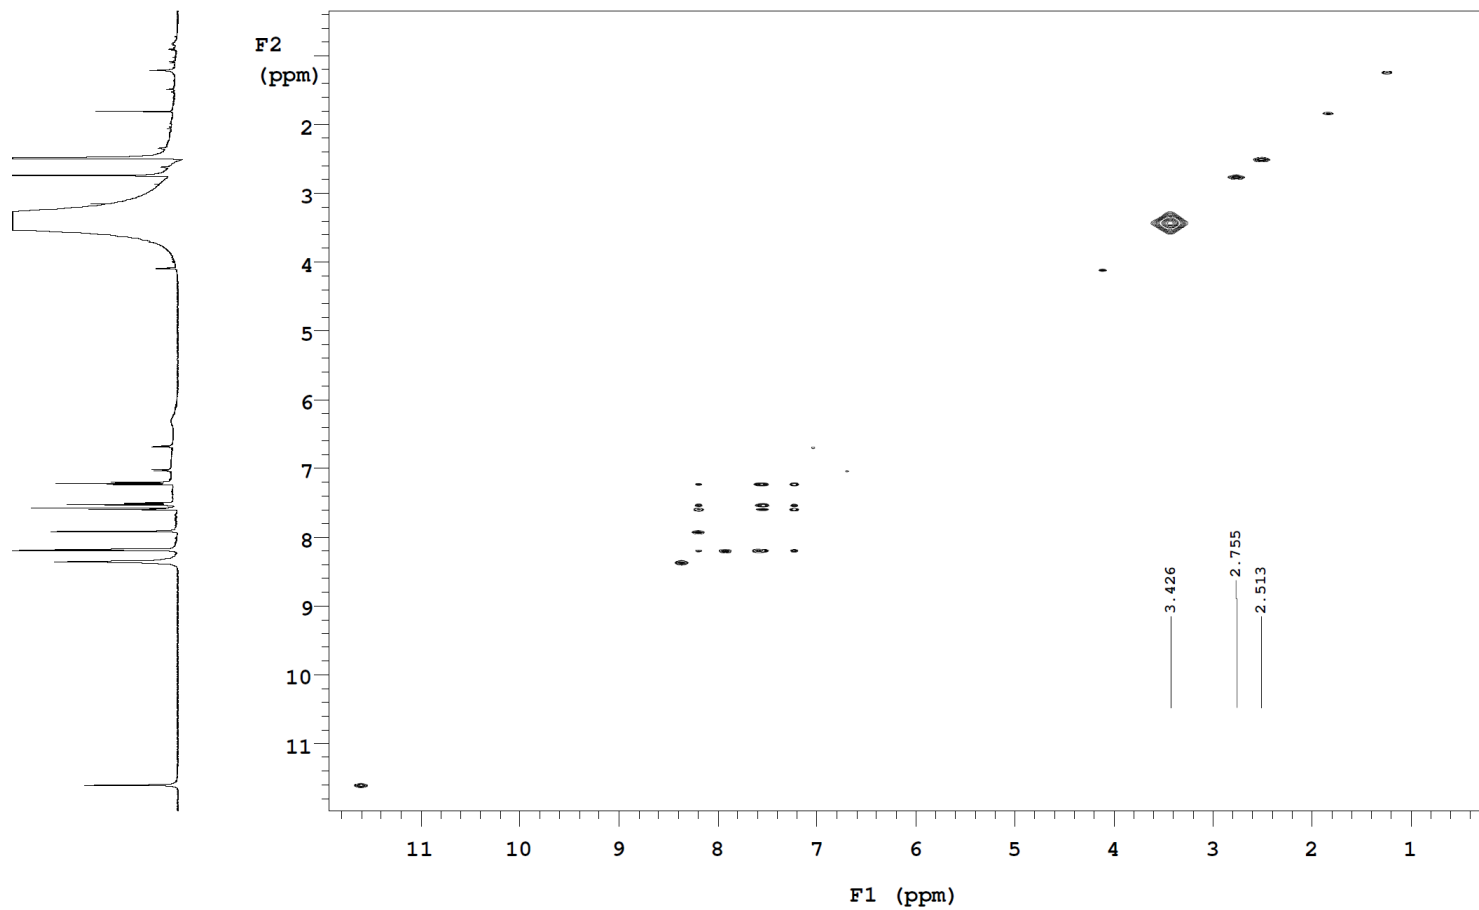

**Figure S75:** TOCSY spectrum (DMSO-*d*<sub>6</sub>, 500 MHz) of harman “1-methyl- $\beta$ -carboline” (**12**)



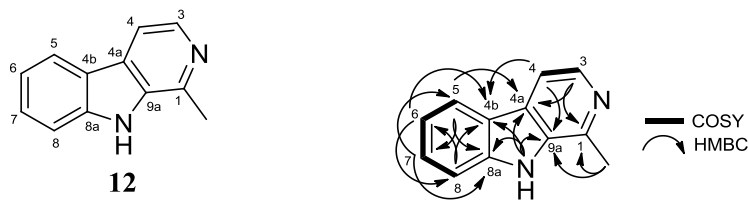

**Figure S77.** Chemical structure,  $^1\text{H}$ - $^1\text{H}$ -COSY and selected HMBC correlations in harman (**12**)

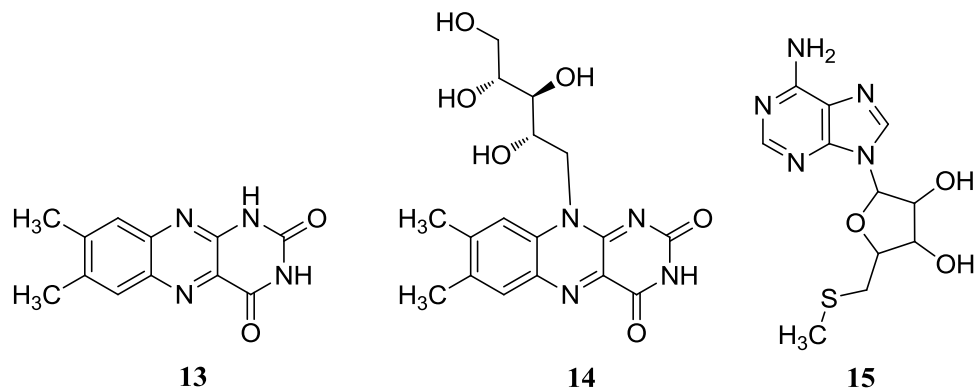

**Figure S78:** Chemical structures of lumichrome (**13**), riboflavin (**14**) and 5'-methylthioadenosine (**15**)

**Table S1.** Cytotoxic activities of compounds **1-7** at 10  $\mu$ M (average of three independent replicates); see Figure 4.

| Compounds    | PC3   |      | A549  |      | U118  |      |
|--------------|-------|------|-------|------|-------|------|
|              | Mean  | SD   | Mean  | SD   | Mean  | SD   |
| Veh. Control | 100.0 | 10.3 | 100.0 | 23.6 | 100.0 | 23.7 |
| <b>1</b>     | 39.0  | 0.6  | 19.9  | 1.4  | 31.3  | 1.6  |
| <b>2</b>     | 69.0  | 5.6  | 47.4  | 4.6  | 40.5  | 0.7  |
| <b>3</b>     | 154.9 | 13.7 | 164.0 | 27.3 | 186.1 | 9.6  |
| <b>4</b>     | 98.3  | 5.2  | 96.6  | 11.3 | 61.0  | 8.4  |
| <b>5</b>     | 47.7  | 1.2  | 32.6  | 3.5  | 53.6  | 5.9  |
| <b>6</b>     | 27.0  | 0.8  | 10.5  | 0.5  | 20.8  | 0.7  |
| <b>7</b>     | 36.4  | 1.3  | 16.6  | 0.7  | 29.4  | 1.2  |

SD= Standard deviation, Vehicle control= 1% DMSO and media

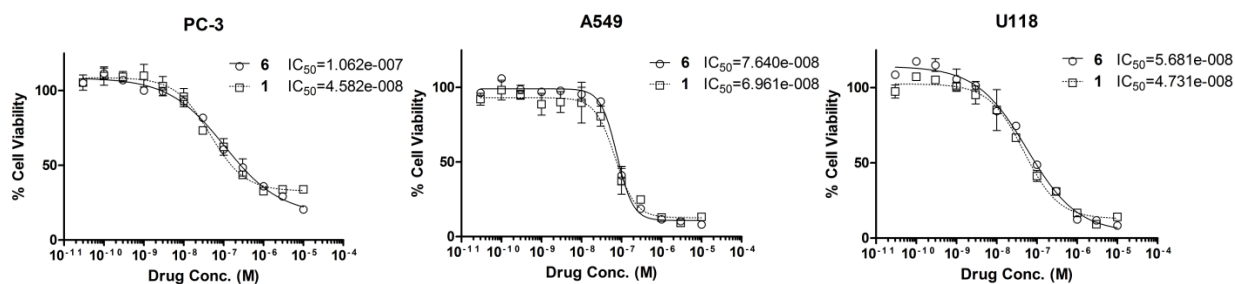

**Figure S79.** Dose–response curve of AT2433-A3 (**1**) and AT2433-A1 (**6**) in PC3 (Prostate), A549 (lung) and U118 (brain) human cancer cell lines at 72h; see Table 3.



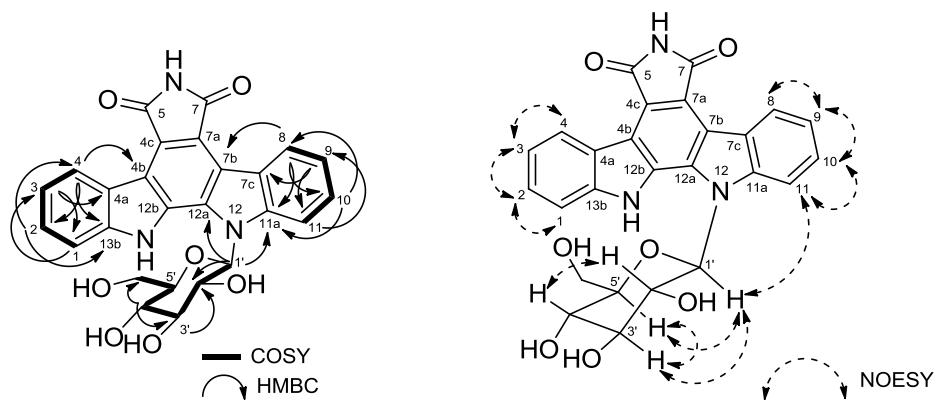

**Figure S80.** Selected  $^1\text{H}$ - $^1\text{H}$ -COSY, HMBC and NOESY correlations in BMY-41219 (**5**)

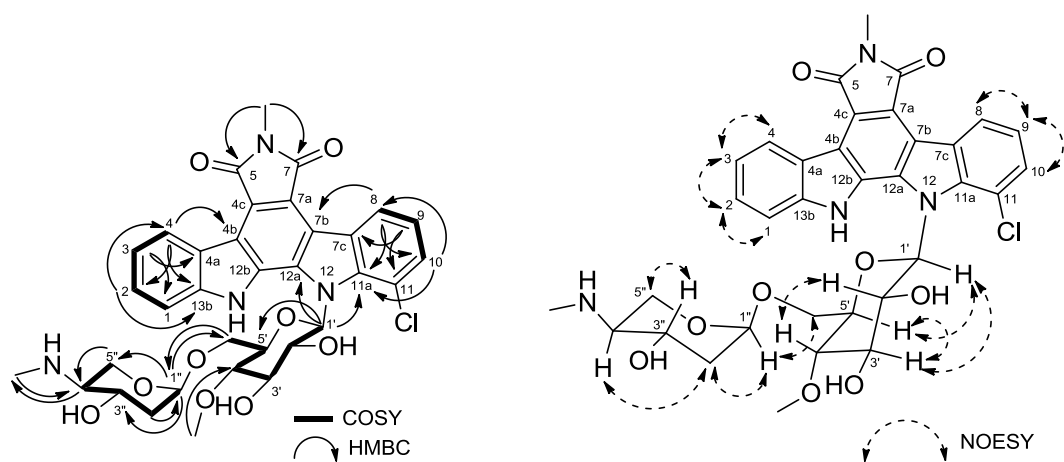

**Figure S81.** Selected  $^1\text{H}$ - $^1\text{H}$ -COSY, HMBC and NOESY correlations in AT2433-A1 (**6**)

**Table S2.**  $^{13}\text{C}$  (100 MHz) and  $^1\text{H}$  NMR data of compounds **5-7**

| Position             | BMY-41219 ( <b>5</b> ) <sup>a,b)</sup> |                                                      | AT2433-A1 ( <b>6</b> ) <sup>a,b)</sup> |                                                      | AT2433-B1 ( <b>7</b> ) <sup>a)</sup>     |                                          |                                                        |
|----------------------|----------------------------------------|------------------------------------------------------|----------------------------------------|------------------------------------------------------|------------------------------------------|------------------------------------------|--------------------------------------------------------|
|                      | $\delta_{\text{C}}$ , type             | $\delta_{\text{H}}^{\text{c)}$ , m ( <i>J</i> in Hz) | $\delta_{\text{C}}$ , type             | $\delta_{\text{H}}^{\text{c)}$ , m ( <i>J</i> in Hz) | $\delta_{\text{C}}$ , type <sup>d)</sup> | $\delta_{\text{C}}$ , type <sup>b)</sup> | $\delta_{\text{H}}^{\text{d,e)}$ , m ( <i>J</i> in Hz) |
| 1                    | 113.0, CH                              | 7.66, dd (8.0, 1.0)                                  | 112.6, CH                              | 7.58, d (8.0)                                        | 112.3, CH                                | 112.6, CH                                | 7.81, d (8.4)                                          |
| 2                    | 128.2, CH                              | 7.47, td (7.0, 1.0)                                  | 129.2, CH                              | 7.55, td (7.0, 1.5)                                  | 127.9, CH                                | 128.5, CH                                | 7.67, t (7.6)                                          |
| 3                    | 121.5, CH                              | 7.24, td (7.0, 1.0)                                  | 122.4, CH                              | 7.29, t (8.0)                                        | 121.4, CH                                | 121.3, CH                                | 7.42, t (7.6)                                          |
| 4                    | 126.2, CH                              | 9.00, dd (7.0, 1.0)                                  | 126.3, CH                              | 8.68, d (8.0)                                        | 126.7, CH                                | 126.4, CH                                | 9.25, d (8.4)                                          |
| 4a                   | 123.5, C                               | -                                                    | 122.9, C                               | -                                                    | 122.8, C                                 | 122.9, C                                 | -                                                      |
| 4b                   | 119.5, C                               | -                                                    | 119.5, C                               | -                                                    | 119.4, C                                 | 119.1, C                                 | -                                                      |
| 4c                   | 120.8, C                               | -                                                    | 119.3, C                               | -                                                    | 119.0, C                                 | 120.1, C                                 | -                                                      |
| 5                    | 172.7, C                               | -                                                    | 170.3, C                               | -                                                    | 169.6, C                                 | 171.1, C                                 | -                                                      |
| 6- $\text{CH}_3$     | -                                      | -                                                    | 23.7, $\text{CH}_3$                    | 2.50, s                                              | 23.8, $\text{CH}_3$                      | 23.7, $\text{CH}_3$                      | 3.20, s                                                |
| 7                    | 172.8, C                               | -                                                    | 170.9, C                               | -                                                    | 169.7, C                                 | 171.2, C                                 | -                                                      |
| 7a                   | 122.8, C                               | -                                                    | 122.4, C                               | -                                                    | 120.8, C                                 | 120.5, C                                 | -                                                      |
| 7b                   | 120.8, C                               | -                                                    | 120.9, C                               | -                                                    | 120.8, C                                 | 119.4, C                                 | -                                                      |
| 7c                   | 123.4, C                               | -                                                    | 126.6, C                               | -                                                    | 124.7, C                                 | 123.4, C                                 | -                                                      |
| 8                    | 126.4, CH                              | 9.13, dd (7.5, 0.5)                                  | 125.7, CH                              | 8.87, dd (8.0, 1.0)                                  | 124.4, CH                                | 126.4, CH                                | 9.16, d (8.8)                                          |
| 9                    | 122.0, CH                              | 7.29, td (8.0, 1.0)                                  | 123.7, CH                              | 7.29, t (7.5)                                        | 124.3, CH                                | 122.3, CH                                | 7.42, t (7.6)                                          |
| 10                   | 128.2, CH                              | 7.52, td (7.0, 1.5)                                  | 131.4, CH                              | 7.51, dd (7.5, 1.0)                                  | 128.0, CH                                | 128.8, CH                                | 7.67, t (7.6)                                          |
| 11                   | 112.0, C                               | 7.78, d (9.0)                                        | 117.9, C                               | -                                                    | 111.8, CH                                | 111.7, CH                                | 8.05, d (8.8)                                          |
| 11a                  | 143.9, C                               | -                                                    | 139.4, C                               | -                                                    | 139.2, C                                 | 143.7, C                                 | -                                                      |
| 12                   | -                                      | -                                                    | -                                      | -                                                    | -                                        | -                                        | -                                                      |
| 12a                  | 130.0, C                               | -                                                    | 130.8, C                               | -                                                    | 129.0, C                                 | 129.5, C                                 | -                                                      |
| 12b                  | 131.7, C                               | -                                                    | 131.4, C                               | -                                                    | 129.9, C                                 | 130.8, C                                 | -                                                      |
| 13                   | -                                      | -                                                    | -                                      | -                                                    | -                                        | -                                        | 11.83, brs                                             |
| 13a                  | 142.9, C                               | -                                                    | 141.7, C                               | -                                                    | 140.8, C                                 | 141.9, C                                 | -                                                      |
| 1'                   | 86.6, CH                               | 6.19, d (9.0)                                        | 86.2, CH                               | 6.90, d (9.5)                                        | 86.5, CH                                 | 87.0, CH                                 | 6.38, d (8.8)                                          |
| 2'                   | 74.9, CH                               | 3.85, t (9.0)                                        | 73.8, CH                               | 3.79, m                                              | 71.0, CH                                 | 75.1, CH                                 | 3.41, m                                                |
| 2'-OH                | -                                      | -                                                    | -                                      | -                                                    | -                                        | -                                        | 5.47-5.37, brs                                         |
| 3'                   | 78.7, CH                               | 3.76, t (9.5)                                        | 79.3, CH                               | 3.69, m                                              | 76.2, CH                                 | 79.1, CH                                 | 3.50, m                                                |
| 3'-OH                | -                                      | -                                                    | -                                      | -                                                    | -                                        | -                                        | 5.28, d (6.5)                                          |
| 4'                   | 69.5, CH                               | 4.27, t (9.5)                                        | 80.4, CH                               | 3.69, m                                              | 79.3, CH                                 | 80.6, CH                                 | 3.67, m                                                |
| 4'- $\text{OCH}_3$   | -                                      | -                                                    | 61.5, $\text{CH}_3$                    | 3.77, s                                              | 59.0, $\text{CH}_3$                      | 61.4, $\text{CH}_3$                      | 3.63, s                                                |
| 5'                   | 80.7, CH                               | 4.00, dd (9.5, 2.0)                                  | 79.7, CH                               | 4.05, m                                              | 76.4, CH                                 | 79.4, CH                                 | 3.94, m                                                |
| 6'                   | 60.2, $\text{CH}_2$                    | 4.26, d (9.0),<br>4.06, dd (11.5, 2.5)               | 67.8, $\text{CH}_2$                    | 4.46, dd (11.5, 2.0),<br>4.12, dd (11.5, 3.5)        | 67.5, $\text{CH}_2$                      | 67.7, $\text{CH}_2$                      | 3.97, m                                                |
| 6'-OH                | -                                      | -                                                    | -                                      | -                                                    | -                                        | -                                        | -                                                      |
| 1''                  | -                                      | -                                                    | 100.4, CH                              | 5.35, t (3.0)                                        | 100.0, CH                                | 100.4, CH                                | 4.93, brs                                              |
| 2''                  | -                                      | -                                                    | 38.7, $\text{CH}_2$                    | 2.60 - 2.56, m                                       | 37.8, $\text{CH}_2$                      | 38.6, $\text{CH}_2$                      | 2.04, m                                                |
|                      |                                        |                                                      |                                        | 2.06, m                                              |                                          |                                          | 1.60, m                                                |
| 3''                  | -                                      | -                                                    | 65.5, CH                               | 4.20, m                                              | 63.4, CH                                 | 65.1, CH                                 | 4.15, m                                                |
| 4''                  | -                                      | -                                                    | 61.6, CH                               | 3.13, m                                              | 60.2, CH                                 | 61.3, CH                                 | 2.93, m                                                |
| 4''- $\text{NHCH}_3$ | -                                      | -                                                    | 31.9, $\text{CH}_3$                    | 2.62, s                                              | 30.8, $\text{CH}_3$                      | 31.3, $\text{CH}_3$                      | 2.22, s                                                |
| 5''                  | -                                      | -                                                    | 59.1, $\text{CH}_2$                    | 4.14, dd (11.0, 4.0)<br>3.96, dd (11.5, 9.5)         | 57.2, $\text{CH}_2$                      | 58.7, $\text{CH}_2$                      | 4.06, m<br>3.92, m                                     |

Assignments supported by 2D HSQC and HMBC experiments

<sup>a)</sup> See supporting information for the NMR spectra; <sup>b)</sup>  $\text{CD}_3\text{OD}$ ; <sup>c)</sup> 500 MHz; <sup>d)</sup>  $\text{DMSO}-d_6$ ; <sup>e)</sup> 400 MHz

## Physico-chemical properties of compounds 5-7 and harman (12)

*BMY-41219* (**5**): yellow solid; UV/vis (MeOH)  $\lambda_{\max}$  227, 285, 316, 408 nm;  $^1\text{H}$  NMR ( $\text{CD}_3\text{OD}$ , 500 MHz) and  $^{13}\text{C}$  NMR ( $\text{CD}_3\text{OD}$ , 100 MHz), see Table S2; (+)-APCI-MS:  $m/z$  488  $[\text{M} + \text{H}]^+$ ; (+)-HR-ESI-MS:  $m/z$  488.1451  $[\text{M} + \text{H}]^+$  (calcd for  $\text{C}_{26}\text{H}_{22}\text{N}_3\text{O}_7$ , 488.1452); (-)-HR-ESI-MS:  $m/z$  486.1294  $[\text{M} - \text{H}]^-$  (calcd for  $\text{C}_{26}\text{H}_{20}\text{N}_3\text{O}_7$ , 486.1295).

*AT2433-A1* (**6**): yellow solid; UV/vis (MeOH)  $\lambda_{\max}$  ( $\log \epsilon$ ) 237 (4.18), 289 (4.11), 318 (4.23), 400 (3.16) nm;  $^1\text{H}$  NMR ( $\text{CD}_3\text{OD}$ , 500 MHz) and  $^{13}\text{C}$  NMR ( $\text{CD}_3\text{OD}$ , 100 MHz), see Table S2; (+)-APCI-MS:  $m/z$  679  $[\text{M} + \text{H}]^+$ .

*AT2433-B1* (**7**): yellow solid; UV/vis (MeOH)  $\lambda_{\max}$  237, 286, 319, 406 nm;  $^1\text{H}$  NMR ( $\text{DMSO}-d_6$ , 400 MHz) and  $^{13}\text{C}$  NMR ( $\text{DMSO}-d_6$ , 100 MHz), ( $\text{CD}_3\text{OD}$ , 100 MHz), see Table S2; (+)-APCI-MS:  $m/z$  645  $[\text{M} + \text{H}]^+$ .

*Harman* (*1-Methyl- $\beta$ -carboline*, **12**): white powder; blue UV-absorbing (254 nm), fluorescence (365 nm); pale-yellow with anisaldehyde/ $\text{H}_2\text{SO}_4$  spraying reagent;  $R_f$  0.38 (silica gel, 10% MeOH- $\text{CH}_2\text{Cl}_2$ ); UV  $\lambda_{\max}$  238, 295, 368 nm;  $^1\text{H}$  NMR ( $\text{DMSO}-d_6$ , 500 MHz):  $\delta$  11.60 (brs, 1H, NH), 8.20 (d,  $J = 5.5$  Hz, 1H, H-3), 8.19 (d,  $J = 8.5$  Hz, 1H, H-5), 7.92 (d,  $J = 5.5$  Hz, 1H, H-4), 7.59 (d,  $J = 8.0$  Hz, 1H, H-8), 7.52 (t,  $J = 7.0$  Hz, 1H, H-7), 7.22 (t,  $J = 7.0$  Hz, 1H, H-6), 2.76 (s, 3H, 1- $\text{CH}_3$ );  $^{13}\text{C}$  NMR ( $\text{DMSO}-d_6$ , 125 MHz):  $\delta$  142.1 (Cq-1), 140.4 (Cq-8a), 137.5 (CH-3), 134.5 (Cq-9a), 127.8 (CH-7), 126.8 (Cq-4a), 121.7 (CH-5), 121.1 (Cq-4b), 119.2 (CH-6), 112.7 (CH-4), 112.0 (CH-8), 20.5 (1- $\text{CH}_3$ ); (+)-APCI-MS:  $m/z$  183  $[\text{M} + \text{H}]^+$ ; (-)-APCI-MS:  $m/z$  181  $[\text{M} - \text{H}]^-$ ; (+)-HR-ESI-MS:  $m/z$  183.0918  $[\text{M} + \text{H}]^+$  (calcd for  $\text{C}_{12}\text{H}_{11}\text{N}_2$ , 183.0917); (-)-HR-ESI-MS:  $m/z$  181.0771  $[\text{M} - \text{H}]^-$  (calcd for  $\text{C}_{12}\text{H}_9\text{N}_2$ , 181.0771). See figure S77, for COSY and HMBC correlations.
